# Supplementary material for: Assessing the impact on chronic disease of incorporating the societal cost of greenhouse gases into the price of food: an econometric and comparative risk assessment modelling study
Source: PubMed Central journal article supplement — BMJ Open. 2013 Oct 22;3(10):e003543. doi: 10.1136/bmjopen-2013-003543 (PMC3808835; doi:10.1136/bmjopen-2013-003543), 2013-10-22
Supplement: bmjopen-2013-003543.draft_revisions.pdf [file bmjopen-2013-003543.draft_revisions.pdf]

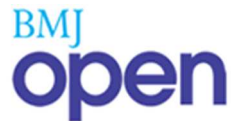

**Assessing the Impact on Chronic Disease of Incorporating  
the Societal Cost of Greenhouse Gases into the Price of  
Food: an Econometric and Comparative Risk Assessment  
Modelling Study**

|                                 |                                                                                                                                                                                                                                                                                                                                                                                                                                                                                                                |
|---------------------------------|----------------------------------------------------------------------------------------------------------------------------------------------------------------------------------------------------------------------------------------------------------------------------------------------------------------------------------------------------------------------------------------------------------------------------------------------------------------------------------------------------------------|
| Journal:                        | <i>BMJ Open</i>                                                                                                                                                                                                                                                                                                                                                                                                                                                                                                |
| Manuscript ID:                  | bmjopen-2013-003543                                                                                                                                                                                                                                                                                                                                                                                                                                                                                            |
| Article Type:                   | Research                                                                                                                                                                                                                                                                                                                                                                                                                                                                                                       |
| Date Submitted by the Author:   | 04-Jul-2013                                                                                                                                                                                                                                                                                                                                                                                                                                                                                                    |
| Complete List of Authors:       | Briggs, Adam; University of Oxford, Nuffield Department of Population Health<br>Kehlbacher, Ariane; University of Reading, School of Agriculture, Policy and Development<br>Tiffin, Richard; University of Reading, School of Agriculture, Policy and Development<br>Garnett, Tara; University of Oxford, Environmental Change Institute<br>Rayner, Mike; University of Oxford, Nuffield Department of Population Health<br>Scarborough, Peter; University of Oxford, Nuffield Department of Population Health |
| <b>Primary Subject Heading</b>: | Public health                                                                                                                                                                                                                                                                                                                                                                                                                                                                                                  |
| Secondary Subject Heading:      | Health policy, Nutrition and metabolism, Occupational and environmental medicine                                                                                                                                                                                                                                                                                                                                                                                                                               |
| Keywords:                       | PUBLIC HEALTH, Health policy < HEALTH SERVICES ADMINISTRATION & MANAGEMENT, NUTRITION & DIETETICS, EPIDEMIOLOGY                                                                                                                                                                                                                                                                                                                                                                                                |
|                                 |                                                                                                                                                                                                                                                                                                                                                                                                                                                                                                                |

SCHOLARONE™  
Manuscripts

**TITLE**

Assessing the Impact on Chronic Disease of Incorporating the Societal Cost of Greenhouse Gases into the Price of Food: an Econometric and Comparative Risk Assessment Modelling Study

**AUTHORS**

Adam DM Briggs<sup>a</sup>, Ariane Kehlbacher<sup>b</sup>, Richard Tiffin<sup>b</sup>, Tara Garnett<sup>c</sup>, Mike Rayner<sup>a</sup>, Peter Scarborough<sup>a</sup>

**AFFILIATIONS**

a British Heart Foundation Health Promotion Research Group, Nuffield Department of Population Health, University of Oxford, Oxford, UK

b School of Agriculture, Policy and Development, University of Reading, Reading, UK

c Food Climate Research Network, University of Oxford, Oxford, UK

**CORRESPONDENCE TO:**

Adam Briggs, British Heart Foundation Health Promotion Research Group, Nuffield Department of Population Health, University of Oxford, Oxford. UK. OX3 7LF.

Email: [adam.briggs@dph.ox.ac.uk](mailto:adam.briggs@dph.ox.ac.uk)

Phone: +44 1865 289200

**KEYWORDS**

Nutrition, taxation, greenhouse gas emissions, chronic disease

**WORD COUNT**

4991

## ABSTRACT

### Objectives

To model the impact on chronic disease of a tax on UK food and drink that internalises the wider costs to society of greenhouse gas emissions, and to estimate the potential revenue.

### Design

An econometric and comparative risk assessment modelling study

### Setting

UK

### Participants

UK adult population

### Interventions

Two tax scenarios are modelled:

- (a) a tax of £2.72/tonne carbon dioxide equivalents (tCO<sub>2</sub>e)/100g product applied to all food and drink groups with above average greenhouse gas emissions.
- (b) as with scenario (a) but food groups with emissions below average are subsidised to create a tax neutral scenario.

### Outcome measures

Primary outcomes are change in UK population mortality from chronic diseases following the implementation of each taxation strategy, the change in UK greenhouse gas emissions, and the predicted revenue.

Secondary outcomes are the changes to the micronutrient composition of the UK diet.

**Results**

Scenario (a) results in 6,750 (95% credible intervals: 6,150 to 7,350) deaths averted and a reduction in GHG emissions of 18,800 (14,700 to 23,000) ktCO<sub>2</sub>e per year. Estimated annual revenue is £2.03 (£1.98 to £2.07) billion.

Scenario (b) results in 3,720 (2,980 to 4,460) extra deaths and a reduction in GHG emissions of 16,100 (12,000 to 20,400) ktCO<sub>2</sub>e per year.

**Conclusions**

Incorporating the societal cost of greenhouse gases into the price of foods could save nearly 7,000 lives in the UK each year, reduce food-related GHG emissions, and generate substantial tax revenue. The revenue neutral scenario (b) demonstrates that sustainability and health goals are not always aligned. Future work should focus on investigating the health impact by population subgroup and on designing fiscal strategies to promote both sustainable and healthy diets.

## ARTICLE SUMMARY

### Article focus

- Climate change has been described as ‘the biggest global health threat of the 21<sup>st</sup> century’ and agriculture contributes up to 32% of global greenhouse gas emissions.
- Taxation based on greenhouse gas (GHG) emissions is a potential mechanism for internalising the wider costs of climate change to society.
- This study models the impact of taxing food and drink based on their greenhouse gas emissions to estimate the effect on health of diets low in greenhouse gas emissions.

### Key messages

- Incorporating the societal cost of greenhouse gases into the price of foods could significantly improve population health at the same time as reducing food-related GHG emissions, and generating substantial tax revenue.
- However, health and sustainability goals are not always aligned and there is the potential to worsen population health when subsidising food and drink products low in greenhouse gas emissions.

### Strengths and limitations of the study

- This study uses the best currently available datasets to estimate the effects of a taxation strategy on both the taxed product, as well as on substituting and complementing products.
- The data on UK greenhouse gas emissions for different food groups are not complete meaning that for some foods, levels of emissions were estimated from related food groups or constituent ingredients.
- Due to limitations of the economic data, this study is not able to estimate the health impact by different subgroups of society, such as socioeconomic group.

1  
2  
3  
4  
5  
6  
7  
8  
9  
10  
11  
12  
13  
14  
15  
16  
17  
18  
19  
20  
21  
22  
23  
24  
25  
26  
27  
28  
29  
30  
31  
32  
33  
34  
35  
36  
37  
38  
39  
40  
41  
42  
43  
44  
45  
46  
47  
48  
49  
50  
51  
52  
53  
54  
55  
56  
57  
58  
59  
60

**FUNDING STATEMENT**

This research received no specific grant from any funding agency in the public, commercial or not-for-profit sectors.

**COMPETING INTERESTS**

None declared

**AUTHORS' CONTRIBUTIONS**

PS had the original idea for the study. AB coordinated the study, designed the study methodology and ran the modelling except for the calculation and application of price elasticities. RT designed the economic modelling for devising price elasticities. AK devised how to apply the tax strategy to price elasticities and ran the economic modelling. PS designed the model to determine health outcomes. AB wrote the initial draft of the manuscript. PS, AK, RT, TG, and MR all commented on and contributed to the study methodology and edited various drafts of the final manuscript.

**DATA SHARING STATEMENT**

Price elasticity data are available from the authors on request. The values for all of the parameters in the DIETRON model, and the sources from which they are drawn, are provided in the supplementary data of an open access journal article and the complete model is available from the authors on request.

## INTRODUCTION

Climate change has been described as ‘the biggest global health threat of the 21<sup>st</sup> century’ with rising global temperatures projected to alter disease patterns, increase food and water insecurity, and lead to extreme climatic events.<sup>1</sup> Globally, agriculture is thought to directly contribute to between 10 and 12% of total greenhouse gas (GHG) emissions, and up to 32% of global emissions if land-use change is included.<sup>2,3</sup> The need for sustainable food systems to address climate change has been highlighted by both the United Nations (UN) and the World Health Organization (WHO).<sup>4,5</sup>

In the UK, the 2010 annual GHG inventory report submitted to the United Nations Framework Convention on Climate Change estimates that 46.2 million tonnes of carbon dioxide equivalents (tCO<sub>2</sub>e), approximately 8% of GHG emissions produced in the UK, are related to agriculture.<sup>6</sup> The Climate Change Act was passed by the UK government in 2008 to reduce the UK’s GHG emissions by 80% by 2050 from 1990 levels,<sup>7</sup> although projections indicate that the interim target of a 50% reduction by 2027 is unlikely to be achieved.<sup>8</sup> Recent reviews have suggested that substantial reductions in GHG emissions from agriculture are unlikely through technological improvements alone, and will require changes in food consumption patterns.<sup>9,10</sup>

### Food, tax, and health

In the developed world, obesity is a major health problem and is associated with diseases such as diabetes, cardiovascular disease, and some cancers.<sup>11</sup> Furthermore, high intake of specific food groups, such as red and processed meat are also associated with ill-health.<sup>12–14</sup> Conversely, high intake of other food groups, such as fruit and vegetables, protect against ill-health.<sup>15–17</sup>

Countries are increasingly using taxation to change population eating habits and improve health; examples include the recently withdrawn tax on saturated fat in Denmark, a tax on a variety of unhealthy foods in Hungary, and a tax on sweetened drinks in France.<sup>18</sup> The majority of studies investigating the relationship between food taxation and health are based on modelling, which offers the flexibility to illustrate a range of scenarios.<sup>19</sup> In modelling taxes, it is important to account for the effect of substituting with other foods as there is the potential that taxes designed to improve health may inadvertently do the opposite, for example by heavily taxing saturated fat people may then consume more salt.<sup>20</sup> In summarising the current evidence from trials and modelling studies, a review by Mytton et al. suggests that any tax would need to be 20% or higher to have a significant impact on purchasing patterns and population health.<sup>18</sup>

A tax on foods associated with high GHG emissions could potentially help to internalise the wider cost of GHGs to society, however it is unclear whether such a tax would have beneficial or harmful side-effects on health.<sup>21–23</sup> Other studies have explored the potential health implications of diets that reduce GHG emissions;<sup>23–33</sup> however, many of these have modelled arbitrary changes in diet that may not reflect possible changes in consumption (e.g. replacing red meat with fruit and vegetables).<sup>24–27</sup> Other studies that have investigated more realistic dietary scenarios do not offer a mechanism to change population dietary habits.<sup>28–32</sup> Wilson et al. identified dietary patterns that were low cost, low in GHG emissions, and beneficial for health, and suggest that fiscal measures may be an appropriate mechanism by which to alter New Zealand dietary habits.<sup>33</sup> Edjabou and Smed are the only authors to have previously modelled the impact on health of internalising the cost of GHG emissions through taxation.<sup>23</sup> The authors investigated the impact of raising the price of food by either 756 DKK

(£86) or 260 DKK (£30) per tonne of carbon dioxide equivalents (tCO<sub>2</sub>e) on Danish population saturated fat and sugar consumption. However, the magnitude of any subsequent health effects is not quantified.<sup>23</sup>

In order to account for, and internalise, the wider costs to society of climate change from food production and consumption in the UK, we model the effect of a UK GHG emission food tax on health. Two scenarios are modelled: the first taxes food groups with GHG emissions greater than average, and the second taxes high GHG emission food groups and subsidises those with low emissions to create a revenue-neutral scenario. We show that internalising the costs of GHG emissions in the food system has the potential to reduce GHG emissions, generate significant revenue, and save lives.

**METHODS**

We use a five-step method to model the impact of a GHG emission food tax on the health of the UK population (as measured by annual deaths averted or delayed).

**Step 1 – set the tax rates**

The modelled tax rates are based on the UK government’s Department for Environment, Food and Rural Affairs (Defra) agriculture marginal abatement cost curve (MACC) by Moran et al., adjusted to 2010 prices.<sup>34</sup> MACCs are used to prioritise the implementation of GHG abatement strategies. They plot the impact on GHG emissions of different interventions in the order of cost-effectiveness thereby allowing the user to visualise the cost (or savings) of reducing emissions by a specific amount using a given intervention. By plotting the cost-effectiveness of different strategies to reduce GHG emissions from agriculture, the agriculture MACC suggests that investment of £24.10/tCO<sub>2</sub>e (£27.19/tCO<sub>2</sub>e, 2010 prices) can reduce UK agricultural GHG emissions by 7,850 ktCO<sub>2</sub>e (16.2%), with the next most cost-effective abatement strategy costing significantly more (£174.22/tCO<sub>2</sub>e, £196.60/tCO<sub>2</sub>e, 2010 prices).<sup>34</sup> The specific tax level chosen for this analysis corresponds with the threshold identified in the MACC that allows for substantial reductions of GHG emissions at a cost of £24.10/tCO<sub>2</sub>e (£27.19/tCO<sub>2</sub>e, 2010 prices). The tax rate selected is also similar to the social cost of carbon for the UK economy of £21-£25/tCO<sub>2</sub>e (2010 prices) calculated by the Stern Review<sup>35</sup> although it should be noted that estimations of the cost to society of GHG emissions vary markedly.<sup>36</sup>

Two illustrative scenarios are modelled to investigate the impact on health, change in UK GHG emissions, and revenue generated from a GHG emission tax on food:

- (a) GHG emissions tax of £2.72/tCO<sub>2</sub>e/100g product applied to all food groups with emissions greater than 0.41 kgCO<sub>2</sub>e/100g, the mean level of emissions across all food groups;
- (b) as with (a) but using revenue generated to subsidise food groups with emissions lower than 0.41 kgCO<sub>2</sub>e/100g to create a cost-neutral scenario.

## Step 2 – identify baseline consumption data

Current UK food consumption patterns are taken from the Living Costs and Food Survey (LCF) for 2010, to provide the baseline level of food purchasing prior to the application of a tax.<sup>37</sup> The LCF is a survey of purchasing data for 256 food categories compiled from two-week long food expenditure diaries of 12,196 people (5,263 households) from across the UK. The survey measures purchasing habits and we assumed that all food purchased is consumed.

## Step 3 – identify greenhouse gas emissions for each food group

GHG emissions for different food types, measured as kg of CO<sub>2</sub>e produced for a kg of product, are taken from Audsley et al., the only study to have collated a near complete set of UK specific GHG emissions for a wide range of food types from the literature.<sup>38</sup> Emissions are divided into three categories: primary production; processing, distribution, retail, and preparation; and land-use change.

To derive the level of the tax for each food type, we use the GHG emissions from primary production (up to the retail distribution centre – pre-RDC) and land-use change, and not emissions from processing, distribution, retail, and preparation (post-RDC). This is because post-RDC emissions for individual food types are not available.<sup>38</sup> Furthermore, post-RDC emissions result from the consumer's travel to buy the food and how the consumer chooses to

1  
2  
3 cook the product. These decisions are as much influenced by the price of fuel and electricity,  
4  
5 as food. On a conservative basis, we assume that food purchased in restaurants (not including  
6  
7 takeaway meals) will not change in price as a result of the tax (eating out in 2010 contributed  
8  
9 only 11% of daily calorie intake).<sup>37</sup>  
10

11  
12  
13  
14 Pre-RDC emissions for food categories in the LCF are weighted by the proportion of food  
15  
16 consumed in the UK that is domestically produced, imported from Europe, and imported  
17  
18 from elsewhere in the world using consumption and import data from Food Balance Sheets  
19  
20 published by the Statistics Division of the Food and Agriculture Organization of the United  
21  
22 Nations.<sup>39</sup>  
23  
24  
25

26  
27 Where FAOSTAT food types do not exactly match the food categories used in the LCF, the  
28  
29 food categories are either assigned emissions (and therefore a tax rate) of a weighted average  
30  
31 of the food comprising that group (e.g. fresh fruit), the same emissions as the primary  
32  
33 ingredient in the group (e.g. bread/cereals/flour are assigned the emissions of wheat), or the  
34  
35 emissions of the closest constituent ingredient (e.g. cheese is assigned the same emissions as  
36  
37 butter).  
38  
39  
40

41  
42 The GHG emissions for each food type in kgCO<sub>2</sub>e/kg product are the sum of pre-RDC  
43  
44 emissions (weighted by the proportions domestically produced and imported) and land-use  
45  
46 change related emissions.  
47  
48  
49

50  
51  
52 **Step 4 – apply price elasticities**  
53

54 Price elasticities predict the percentage change in the amount of a food purchased, and of its  
55  
56 substitute and complementary foods, following a one per cent change in price. UK specific  
57  
58  
59

price elasticities are derived for food categories from the LCF, 2010 using methods described in Tiffin and Arnoult.<sup>40</sup> Using three-stage budgeting, we estimate unconditional price elasticities for 29 different food groups into which each of the 256 food categories of the LCF are allocated. The own- and cross-price elasticities used in this study are available from the authors on request. These are then used to predict change in purchasing, and therefore nutritional composition of the diet and annual tax revenue generated following tax scenarios (a) and (b) (table 1). The annual revenue generated by tax scenario (a) is calculated by scaling up the post-tax per person food intake from the LCF to the UK population and multiplying it by the tax per kg of each food group.

**Table 1. Food groups for which price-elasticities are estimated, and the levels of taxation applied to each food group for tax scenarios (a) and (b).**

| Food group                      | GHG emissions/<br>kg product (kgCO <sub>2</sub> e) | Tax/kg product in £ |              |
|---------------------------------|----------------------------------------------------|---------------------|--------------|
|                                 |                                                    | Scenario (a)        | Scenario (b) |
| Milk                            | 1.8                                                | 0                   | -0.06        |
| Other milk products             | 2.4                                                | 0                   | -0.05        |
| Cream                           | 2.4                                                | 0                   | -0.05        |
| Cheese                          | 1.8                                                | 0                   | -0.06        |
| Eggs                            | 4.9                                                | 0.02                | 0.02         |
| Pork                            | 7.9                                                | 0.10                | 0.10         |
| Beef                            | 68.8                                               | 1.76                | 1.76         |
| Poultry                         | 5.4                                                | 0.04                | 0.04         |
| Lamb                            | 64.2                                               | 1.63                | 1.63         |
| Other meat                      | 35.9                                               | 0.86                | 0.86         |
| Fish                            | 5.4                                                | 0.03                | 0.03         |
| Bread/cereals/flour             | 1.0                                                | 0                   | -0.08        |
| Cakes/buns/pastries/biscuits    | 0.9                                                | 0                   | -0.09        |
| Animal fats                     | 35.6                                               | 0.86                | 0.86         |
| Vegetable fats                  | 3.2                                                | 0                   | -0.02        |
| Sugar and preserves             | 0.1                                                | 0                   | -0.11        |
| Sweets                          | 0.1                                                | 0                   | -0.11        |
| Tinned and dried fruit and nuts | 0.9                                                | 0                   | -0.09        |
| Fresh fruit                     | 0.9                                                | 0                   | -0.09        |

|                       |      |      |       |
|-----------------------|------|------|-------|
| Potatoes              | 0.4  | 0    | -0.10 |
| Canned vegetables     | 1.6  | 0    | -0.07 |
| Fresh vegetables      | 1.6  | 0    | -0.07 |
| Fruit juice           | 0.9  | 0    | -0.09 |
| Soft drinks           | 0.1  | 0    | -0.11 |
| Non-coffee hot drinks | 3.0  | 0    | -0.03 |
| Coffee drinks         | 10.1 | 0.16 | 0.16  |
| Beer                  | 3.8  | 0    | -0.01 |
| Wine                  | 1.0  | 0    | -0.08 |
| Other                 | 3.3  | 0    | -0.02 |

GHG, greenhouse gas emissions; kgCO<sub>2</sub>e, kg of carbon dioxide equivalents

The 95% credible intervals of the post-tax estimates of the reduction in GHG emissions, revenue generated, and nutritional composition of the diet reflect the uncertainty surrounding the price elasticity estimates. Elasticities are estimated using a Markov Chain Monte Carlo procedure with 12,000 iterations and a burn-in of 2,000.

### Step 5 – identify population health implications of diet post tax

The effects of the introduction of a food based GHG emission tax on health are modelled using the DIETRON comparative risk assessment model to derive changes in mortality and identify the numbers of deaths averted with each scenario.<sup>41</sup> The DIETRON model uses age- and sex-specific relative risk estimates from meta-analyses to link the consumption of different food categories to mortality (figure 1). Dietary input data are grams/day of fruit, vegetables, salt, and fibre, per cent of total energy derived from total fat, monounsaturated

fatty acids, polyunsaturated fatty acids, saturated fatty acids, trans fatty acids, and dietary cholesterol, and total energy intake in kilocalories/day (kcal/day).<sup>41</sup> Changes in the mortality burden of coronary heart disease, stroke, and cancer are modelled via the intermediary risk factors of blood pressure, blood cholesterol, and obesity. The DIETRON model derives 95% credible intervals using 5,000 iterations of a Monte Carlo analysis to account for the uncertainty of the relationship between the dietary changes and mortality outcomes reported in the literature. The values for all of the parameters in the DIETRON model, and the sources from which they are drawn, are provided in the supplementary data of an open access journal article and the complete model is available from the authors on request.<sup>42</sup>

Following the change in UK population diet, the number of people consuming less than the recommended daily intake of vitamins A and B12, calcium, iron, and zinc are estimated. Consumption of micronutrients are assumed to follow a log-normal distribution with mean and standard deviation taken from the National Diet and Nutrition Survey (NDNS) years 1 and 2 (2008/9 – 2009/10).<sup>43</sup> NDNS collects four-day food diaries for 2126 participants as well as blood samples to help assess nutritional status; when calculating the distributions we used total micronutrients consumed including supplements. Where recommended daily intakes vary between men and women, the average is used.<sup>44</sup>

## RESULTS

Table 2 shows that following tax scenarios (a) and (b) the largest changes in consumption occurred with beef (14.3% reduction in scenario (a), 14.2% in scenario (b)) and lamb (14.0% reduction in both scenarios). Both scenarios also led to increases in the consumption of fresh fruit and vegetable fats by more than 4%, and small reductions in the consumption of alcohol (although uncertainty estimates surrounding changes in fruit and alcohol consumption included 0%). Unlike scenario (a), scenario (b) resulted in a 5.1% increase in sugar and preserves consumption and a 13.1% increase in soft drink consumption (compared to a 2.4% reduction in scenario (a)).

**Table 2. Percentage change in consumption of different food groups following the implementation of tax scenarios (a) and (b).**

| Food group          | Scenario (a) (95% CIs)                | Scenario (b) (95% CIs)    |
|---------------------|---------------------------------------|---------------------------|
|                     | Total change in quantity consumed (%) |                           |
| Milk                | -1.09 (-2.00 to -0.17)                | +4.96 (+3.61 to +6.31)    |
| Other milk products | -0.71 (-1.30 to -0.12)                | +0.90 (+0.24 to +1.55)    |
| Cream               | +0.00 (-0.00 to +0.00)                | +0.62 (+0.12 to +1.12)    |
| Cheese              | -0.38 (-0.70 to -0.07)                | +0.34 (-0.02 to +0.70)    |
| Eggs                | -0.43 (-0.58 to -0.28)                | -0.37 (-0.67 to -0.09)    |
| Pork                | -0.86 (-1.29 to -0.44)                | -0.69 (-1.13 to -0.26)    |
| Beef                | -14.28 (-17.93 to -10.63)             | -14.21 (-17.86 to -10.56) |
| Poultry             | -0.19 (-0.50 to +0.13)                | -0.09 (-0.41 to +0.22)    |
| Lamb                | -14.00 (-23.92 to -4.09)              | -14.00 (-23.92 to -4.09)  |
| Other meat          | -9.33 (-10.73 to -7.93)               | -8.98 (-10.39 to -7.58)   |

|                                         |                           |                           |
|-----------------------------------------|---------------------------|---------------------------|
| Fish                                    | -0.83 (-1.67 to +0.01)    | -0.73 (-1.51 to +0.04)    |
| Bread, cereals, flour, and other starch | -0.71 (-2.87 to +1.45)    | +1.76 (-0.57 to +4.09)    |
| Cakes, buns, pastries, and biscuits     | -0.27 (-1.09 to +0.55)    | +1.48 (+0.57 to +2.38)    |
| Animal fats                             | -13.26 (-16.11 to -10.41) | -13.13 (-16.03 to -10.23) |
| Vegetable fats                          | +6.55 (+4.31 to +8.79)    | +7.46 (+4.94 to +9.99)    |
| Sugar and preserves                     | -0.02 (-0.08 to +0.04)    | +5.14 (+4.82 to +5.46)    |
| Sweets                                  | -0.12 (-0.36 to +0.12)    | +0.66 (+0.35 to +0.98)    |
| Tinned and dried fruit, and nuts        | +0.08 (-0.05 to +0.21)    | +1.26 (+0.98 to +1.54)    |
| Fresh fruit                             | +4.47 (-2.32 to +11.25)   | +6.77 (-0.53 to +14.08)   |
| Potatoes                                | -0.77 (-1.10 to -0.46)    | +2.53 (+2.04 to +3.01)    |
| Canned vegetables                       | -1.38 (-1.90 to -0.85)    | +0.58 (+0.05 to +1.11)    |
| Fresh vegetables                        | -2.57 (-3.54 to -1.61)    | +0.21 (-0.77 to +1.18)    |
| Fruit juice                             | -0.15 (-0.32 to +0.02)    | +6.78 (+5.28 to +8.27)    |
| Soft drinks                             | -2.36 (-5.01 to +0.29)    | +13.06 (+9.62 to +16.51)  |
| Non-coffee drinks                       | -0.75 (-1.59 to +0.10)    | +0.01 (-0.95 to +0.96)    |
| Coffee drinks                           | -1.95 (-2.98 to -0.93)    | -1.43 (-2.61 to -0.26)    |
| Beer                                    | -0.37 (-1.45 to +0.70)    | -0.17 (-1.02 to +0.68)    |
| Wine                                    | -1.68 (-6.43 to +3.07)    | -1.38 (-5.06 to +2.31)    |
| Other alcoholic beverages               | -0.28 (-1.10 to +0.53)    | -0.26 (-0.90 to +0.37)    |

CI, confidence interval

Tax scenario (a) predicted a change in energy intake from 2,027 kcals/day to 2,004 kcals/day (95% credible intervals: 1,992 kcals/day to 2,017 kcals/day), a 1.1% reduction (table 3).

There were also overall reductions in consumption of cholesterol, saturated fatty acids, vitamin A, and vitamin B12 by more than 2% (mean levels of vitamins A and B12 remained

above the UK daily recommended intake). All other nutrients and dietary constituents increased or decreased by less than 2%.

Tax scenario (b) resulted in an increase in calorie consumption from 2,027kcal/day to 2,051kcal/day (2,038kcal/day to 2,064kcal per day), a 1.2% increase (table 3). In this scenario there was a reduction in cholesterol consumption of 2.2%, and increases in consumption of fruit and vegetables, calcium, polyunsaturated fatty acids, and sugar of over 2%. The remaining nutrients did not vary from baseline by more than 2%.

**Table 3. Nutrient composition of baseline diet and diets following tax scenarios (a) and (b), alongside UK recommended daily intakes.**

|                      | Baseline | Scenario (a)<br>(95% CIs) | Scenario (b)<br>(95% CIs) | Recommended<br>daily intake <sup>44</sup> |
|----------------------|----------|---------------------------|---------------------------|-------------------------------------------|
| Energy (kcal/day)    | 2,027    | 2,004 (1,991 to 2,017)    | 2,051 (2,038 to 2,064)    | Female: 2,000;<br>Male: 2,500             |
| Total fat (g/day)    | 84.2     | 83.3 (82.8 to 83.7)       | 84.4 (89.9 to 84.9)       |                                           |
| SAFAs (g/day)        | 32.5     | 31.7 (31.6 to 31.9)       | 32.2 (32.0 to 32.3)       | Female: <20;<br>Male: <30                 |
| MUFAs (g/day)        | 31.0     | 30.6 (30.5 to 30.8)       | 31.0 (30.8 to 31.2)       |                                           |
| PUFAs (g/day)        | 15.3     | 15.5 (15.3 to 15.6)       | 15.7 (15.5 to 15.8)       |                                           |
| Cholesterol (mg/day) | 230.0    | 223.1 (222.1 to 224.1)    | 225.0 (224.1 to 225.9)    |                                           |

|                              |       |                        |                        |                               |
|------------------------------|-------|------------------------|------------------------|-------------------------------|
|                              |       | 223.9)                 | 225.8)                 |                               |
| Fibre (g/day)                | 13.1  | 13.0 (12.9 to 13.2)    | 13.3 (13.2 to 13.5)    | 18                            |
| Salt (g/day)                 | 6.3   | 6.2 (6.2 to 6.2)       | 6.3 (6.3 to 6.3)       | 6                             |
| Fruit and vegetables (g/day) | 344.2 | 345.1 (337.3 to 352.9) | 354.9 (346.8 to 363.2) | 400                           |
| Iron (mg/day)                | 10.6  | 10.4 (10.3 to 10.5)    | 10.6 (10.5 to 10.7)    | Female: 14.8;<br>Male: 8.7    |
| Calcium (mg/day)             | 889.1 | 880.5 (874.4 to 886.4) | 909.2 (902.6 to 915.6) | 700                           |
| Zinc (mg/day)                | 8.2   | 8.0 (7.9 to 8.0)       | 8.1 (8.1 to 8.2)       | Female: 4-7;<br>Male: 5.5-9.5 |
| Vitamin A (µg /day)          | 803.6 | 778.7 (774.5 to 782.8) | 793.5 (789.3 to 797.5) | Female: 600;<br>Male: 700     |
| Vitamin D (µg /day)          | 2.7   | 2.7 (2.7 to 2.7)       | 2.7 (2.7 to 2.7)       | Variable                      |
| Vitamin B12 (µg/day)         | 5.7   | 5.6 (5.5 to 5.6)       | 5.7 (5.7 to 5.8)       | 1.5                           |
| Total sugar (g/day)          | 115.4 | 115.0 (114.0 to 116.0) | 120.2 (119.2 to 121.2) |                               |

SAFAs, saturated fatty acids; MUFAs, mono-unsaturated fatty acids; PUFAs, poly-unsaturated fatty acids; CI, credible interval

Following changes in nutrient consumption, tax scenarios (a) and (b) predict shifts in the number of people consuming below the recommended daily amounts of dietary micronutrients (supplementary table S1).<sup>44</sup> Following tax scenario (a), over 1,000,000 extra people consumed less than the recommended daily intake of vitamin A, zinc, and iron. Tax

scenario (b) predicted 1,172,000 extra people would be consuming greater than the recommended daily intake of calcium.

Scenario (a) predicted 6,751 deaths delayed or averted in the UK population per year (95% credible intervals: 6,147 deaths to 7,346 deaths), and 2,156 delayed or averted in people under 75 years old (table 4). Most of the reduction in deaths was due to fewer calories consumed; this leads to changes in population obesity prevalence and a lower burden of cardiovascular disease (tables 4 and 5). If energy intake were to have stayed the same, the improvement in dietary quality would have led to 805 deaths (476 to 1,131) delayed or averted.

Scenario (b) predicted an increase in deaths in the UK population of 3,721 (2,984 to 4,464), and of 789 in those less than 75 years old (table 4). The increase in deaths was due to increased calories consumed, again leading to a change in obesity prevalence and a greater burden of cardiovascular disease (tables 4 and 5). If energy intake were to have stayed the same, the increase in dietary quality would have led to 2,758 (2,278 to 3,232) deaths delayed or averted.

**Table 4. Total deaths delayed or averted by age, and deaths delayed or averted from nutritional changes in the diet following taxation scenarios (a) and (b)<sup>a</sup>.**

| Deaths averted or delayed, scenarios (a) and (b) |                        |                              |                        |                              |
|--------------------------------------------------|------------------------|------------------------------|------------------------|------------------------------|
|                                                  | Scenario (a) (95% CIs) |                              | Scenario (b) (95% CIs) |                              |
|                                                  | Energy intake changes  | Energy intake stays the same | Energy intake changes  | Energy intake stays the same |

|                      |                        |                        |                           |                        |
|----------------------|------------------------|------------------------|---------------------------|------------------------|
| Total                | 6,751 (6,147 to 7,347) | 1,435 (1,135 to 1,729) | -3,721 (-4,464 to -2,984) | 2,374 (2,003 to 2,750) |
| Total under 75 years | 2,156 (1,964 to 2,338) | 602 (486 to 715)       | -789 (-1040 to -545)      | 977 (835 to 1,119)     |
| Fruit and vegetables | 270 (-26 to 555)       | 923 (646 to 1,208)     | 1,930 (1,515 to 2,349)    | 1,252 (916 to 1,589)   |
| Fibre                | -171 (-72 to -273)     | 170 (74 to 268)        | 336 (142 to 536)          | 170 (72 to 266)        |
| Fats                 | 318 (255 to 387)       | 290 (232 to 351)       | 500 (396 to 620)          | 537 (427 to 661)       |
| Salt                 | 321 (383 to 446)       | 0*                     | 0*                        | 383 (323 to 445)       |
| Energy balance       | 5,909 (5,411 to 6,414) | 0*                     | -6,600 (-7,154 to -6,029) | 0*                     |
| Alcohol consumption  | 58 (42 to 73)          | 57 (42 to 73)          | 36 (26 to 46)             | 36 (27 to 46)          |

CI, credible interval.

<sup>a</sup>Numbers for each dietary component do not add up to the overall total of deaths delayed or averted because the DIETRON model accounts for double counting of different nutritional components contributing to the same cause of mortality <sup>41</sup>. Positive numbers indicate deaths delayed or averted.

\*Where there is no change in nutrient consumption there is no parameter to vary for the uncertainty analysis for health outcomes and therefore there are no CIs calculated for these dietary components

**Table 5. Total deaths delayed or averted by cause following taxation scenarios (a) and (b) allowing for energy intake to change.**

|                        | Deaths averted or delayed <sup>a</sup> |                           |
|------------------------|----------------------------------------|---------------------------|
|                        | Scenario (a) (95% CIs)                 | Scenario (b) (95% CIs)    |
| Cardiovascular disease | 4,915 (4,379 to 5,461)                 | -2,823 (-3,484 to -2,176) |
| Diabetes               | 398 (315 to 483)                       | -459 (-562 to -360)       |
| Cancer                 | 1,032 (824 to 1,227)                   | -21 (-329 to 283)         |
| Kidney disease         | 65 (32 to 101)                         | -73(-114 to -33)          |
| Liver disease          | 350 (244 to 461)                       | -346 (-471 to -227)       |

CI, credible intervals

<sup>a</sup>Positive numbers indicate deaths delayed or averted.

In scenario (a), 73% of deaths averted were due to a reduction in cardiovascular disease, and 15% to cancer; in scenario (b), 76% of the increase in premature deaths was due to an increase in cardiovascular disease (table 5).

Table 6 shows that scenario (a) resulted in a reduction in GHG emissions of 18,765 ktCO<sub>2e</sub> (95% credible intervals, 14,674 ktCO<sub>2e</sub> to 23,022 ktCO<sub>2e</sub>). The predicted revenue generated from this scenario was £2,028 million (£1,985 million to £2,068 million). Scenario (b) resulted in a 16,126 ktCO<sub>2e</sub> (12,002 ktCO<sub>2e</sub> to 20,406 ktCO<sub>2e</sub>) reduction in GHG emissions. The reduction in emissions attributable to land-use change in scenario (a) accounted for 75% of the total reduction, and for 82% in scenario (b).

**Table 6. Reduction in greenhouse gas emissions and revenue generated from tax scenarios (a) and (b).**

|  | Scenario (a) (95% CIs) | Scenario (b) (95% CIs) |
|--|------------------------|------------------------|
|--|------------------------|------------------------|

|                                              |                                                 |                                               |
|----------------------------------------------|-------------------------------------------------|-----------------------------------------------|
| Reduction in total emissions                 | 18,765 ktCO <sub>2</sub> e (14,674 to 23,022)   | 16,126 ktCO <sub>2</sub> e (12,002 to 20,406) |
| Reduction in emissions from land-used change | 14,128 ktCO <sub>2</sub> e (10,994 to 17,404)   | 13,282 ktCO <sub>2</sub> e (10,141 to 16,558) |
| Revenue generated                            | £2,028 million (1,985 million to 2,068 million) | N/A                                           |

CI, credible intervals; ktCO<sub>2</sub>e, kilotonne of carbon dioxide equivalents

## DISCUSSION

Our results show that fiscal interventions to reduce GHG emissions from the food sector may have health co-benefits. In scenario (a), taxation at a rate of £2.72/tCO<sub>2</sub>e/100g product has the potential to reduce the burden of premature deaths in the UK by nearly 7,000 per year (1.2% of all UK deaths)<sup>45</sup> at the same time as reducing food related GHG emissions by 18,765 ktCO<sub>2</sub>e and generating up to £2.03 billion revenue. When subsidising products with GHG emissions lower than the average emissions per kg of food consumed in the UK (scenario (b)), we predict a reduction in emissions of 16,126 ktCO<sub>2</sub>e with an increase in premature mortality of 3,721 (0.7% of UK deaths)<sup>45</sup>.

Scenario (b) (revenue neutral) demonstrates how health and sustainability goals are not always aligned and results in some proposed price changes that run against the current trend in public health (e.g. subsidising sugar and soft drinks by 11p per kg due to the low level of GHG emissions associated with sugar). The relationship between food consumption and health is more politically prominent than that between food consumption and the environment, and therefore it is unlikely that a taxation system could be introduced that did not take account of effects on health and address them.

A concern regarding diets that would lead to reduced GHG emissions is that they may result in a decrease in consumption of essential micronutrients. Both modelled scenarios maintain the same broad micronutrient composition as the baseline diet with only moderate reductions in mean vitamin A and vitamin B12 consumption seen in scenario (a) (but these were still within recommended daily levels). Despite small absolute percentage changes in micronutrient consumption, at a population level there may be significant changes to the

number of people consuming below the recommended daily intakes (supplementary table S1).

**Strengths and limitations**

This study is the first to model the impact on population mortality of internalising the societal cost of food-related GHG emissions through increasing price. A strength of this work is that we are able to estimate the effect of price changes on both the taxed product, and on substituting and complementing products. Furthermore both consumption and price elasticity data are derived from the same dataset (LCF), resulting in more accurate modelling of the changes in purchasing and consumption than previous modelling studies in this area.<sup>20,22</sup>

Limitations of this work include that the estimates of GHG emissions of some products are assumed to be identical to related products (for example all tree fruits except oranges are assumed to be the same as apples), and non-UK data are used in some circumstances (for example with fish).<sup>38</sup> Estimates of GHG emissions for some imported products are not known and are assumed to be the same as imported products from elsewhere in the world. Furthermore, GHG emissions from land-use change are likely to vary significantly between and within countries and these variations are not captured by this research. The LCF has a significant non-response rate (50% response rate in Great Britain, and 59% in Northern Ireland) and although the results are weighted for non-response, the results may not be representative of the UK population with certain age and income groups likely to be under-sampled.<sup>46</sup>

In this study, we base estimates of pre- and post-tax diets on the mean population diet. Population diet will vary between individuals and they may respond to price changes

1  
2  
3 differently depending on their age and baseline consumption patterns. We do not account for  
4 these in our uncertainty estimates because the LCF reports at the household rather than  
5 individual level making it not possible to derive age or consumption specific price elasticities.  
6  
7 We are likely to have over-estimated the population consuming below recommended daily  
8 intakes because we chose to use adult recommendations but the mean and distributions of  
9 consumption are estimated for all ages. Furthermore, it was necessary to compromise  
10 between the number of food groups for which own- and cross-price elasticities are estimated,  
11 and the confidence with which those estimates were made; greater numbers of food groups  
12 results in less confidence in the estimates. We disaggregated the diet into 29 different groups  
13 and it is likely that within groups (for example, vegetable fats) certain constituents will vary  
14 (sunflower oil, rapeseed oil, etc.) but we assumed that the percentage change in consumption  
15 for any group applied to all foods within that group.  
16  
17  
18  
19  
20  
21  
22  
23  
24  
25  
26  
27  
28  
29  
30  
31

32 The uncertainty analyses from which the credible intervals are derived only estimate the  
33 parametric uncertainty attached to these estimates (for example the relationship between  
34 calorie intake and obesity), and cannot estimate the structural uncertainty (i.e. the uncertainty  
35 underlying the design of the model). Structural limitations include: the model assumes no  
36 time lag between changes in consumption behaviour and health outcomes; the model is cross-  
37 sectional and therefore cannot predict changes in life expectancy in the counterfactual  
38 scenario; it assumes that all non-food items will remain at the same price in the  
39 counterfactual scenario; and it assumes that reduction in consumption of broad food  
40 categories will be met equally by all items within that category.  
41  
42  
43  
44  
45  
46  
47  
48  
49  
50  
51  
52  
53

54 We assume that all food purchased is consumed; food waste is no longer accounted for in the  
55 LCF and it is possible that the change in purchasing resulting from price increases could have  
56  
57  
58  
59  
60

a smaller impact on consumption patterns through individuals reducing food waste. Therefore individuals may maintain calorie consumption with reduced food purchasing following higher prices, this is thought to be partly driving the reduction in UK food and drink wastage between 2009 and 2011, a period of rising food prices and falling disposable incomes.<sup>47</sup> There would likely be differential changes in food waste patterns with different price changes making modelling of these circumstances difficult.

In our study we assume that calorie consumption will change following the implementation of a tax. Both scenarios modelled in this paper show small changes in calorie intake (1.1% decrease in scenario (a) and 1.2% increase in scenario (b), table 3). Although the changes in calorie intake dominate the modelled changes in mortality (table 4), the changes are considerably fewer than calorie reductions modelled in previous studies of taxes on GHGs or soft drink (where calories are not assumed to be replaced), which suggest that they are plausible.<sup>23,48,49</sup> Extra calories consumed in scenario (b) are primarily due to increases in consumption of bread and cereals, and milk and soft drinks.

In both scenarios (a) and (b), there is a reduction in premature deaths if energy intake remains the same indicating that the post-tax diet is healthier in other respects (table 4). Although this estimate assumes that the percentage change in calories required to keep energy intake the same leads to a diet with equivalent percentage changes to individual nutritional components. Finally, the health impact following the implementation of tax scenarios (a) and (b) is only quantified through the change in diet. We are likely to have underestimated the wider benefits to health of reduced GHG emissions from reduced environmental pollution and slowed climate change both within the UK and around the world.

## Comparisons with other studies

The 2006 Stern Review assessed the implications of climate change on the global economy and described climate change as ‘the greatest and widest-ranging market failure ever seen’.<sup>35</sup> The review went on to calculate the social cost of carbon to society as \$25-\$30/tCO<sub>2</sub>e emitted (£16-19/tCO<sub>2</sub>e, 2000 prices; £21-£25/tCO<sub>2</sub>e, 2010 prices).<sup>35</sup> Our tax rates are not dissimilar to the social costs to society calculated by the Stern Review, and allow for direct comparison between our modelled reduction in GHG emissions to the Defra abatement statistics derived for the agriculture MACC.<sup>34</sup> We estimate that GHG emissions from production and land-use change for UK food consumption amount to 249,207 ktCO<sub>2</sub>e; the reduction in GHG emissions seen in scenario (a) of 18,765 ktCO<sub>2</sub>e equates to 7.5% of these emissions. This is substantially more than the 7,850 ktCO<sub>2</sub>e reduction in GHG emissions estimated by Defra’s agriculture MACC with an equivalent investment of £24.10/tCO<sub>2</sub>e (£27.19/tCO<sub>2</sub>e, 2010 prices).<sup>34</sup> However, unlike the agriculture MACC, our model incorporates emissions from UK consumed food that is produced overseas. Imported products account for the vast majority of emissions relating to land-use change. Without land-use change, the reduction in emissions from scenarios (a) and (b) are both less than that estimated by Moran et al. (2008) at 4,637 ktCO<sub>2</sub>e and 2,844 ktCO<sub>2</sub>e respectively.

Scenario (b) results in a reduction in GHG emissions of 16,126 ktCO<sub>2</sub>e which is less than the reduction in scenario (a). It may be expected that by subsidising foods with below-average GHG emissions there would be an even greater reduction in emissions than found in scenario (a); however, the effect of substituting to other foods, in particular to milk, means that the reduction in GHG emissions is not as marked. It should be noted that although scenario (b) results in an overall increase in calorie intake of 1.2% (because of increased food consumption) and scenario (a) results in a decrease of 1.1%, this makes little difference to the

overall GHG emissions; if calorie consumption were to stay the same as baseline in both scenarios, there would still be an 18,552 ktCO<sub>2</sub>e reduction in scenario (a) compared to 16,316 ktCO<sub>2</sub>e reduction in scenario (b).

The number of deaths delayed or averted are fewer than those predicted by Scarborough et al. who modelled the health impact of three sustainable dietary scenarios,<sup>27</sup> and by Friel et al. who modelled the health benefits of various strategies to reduce agricultural GHG emissions.<sup>25</sup> However, neither study quantified realistic counterfactual dietary scenarios. Friel et al. modelled the effect on ischemic heart disease of a 30% reduction in livestock consumption leading to less saturated fat and cholesterol intake, without accounting for any effect of substituting food products,<sup>25</sup> and Scarborough et al., following the UK Committee on Climate Change Fourth Carbon Budget dietary scenarios, assumed that replacement calories from a 50% reduction in livestock consumption were exclusively derived from fruit, vegetables, and cereals.<sup>27</sup>

Edjabou and Smed investigated the impact of a GHG tax on food in Denmark and identify identical patterns of reductions in GHG emissions and subsequent changes to population food consumption as in our study.<sup>23</sup> Edjabou and Smed find that applying a non-tax neutral scenario results in a greater reduction in emissions than a tax neutral scenario, and that the non-tax neutral scenario reduces overall calorie consumption compared to an increase in the tax neutral model. Similarly both our model and the Edjabou and Smed model identify large reductions in saturated fat consumption alongside small changes in sugar consumption with the non-neutral scenario, and the opposite following the tax neutral scenario. Edjabou and Smed's model does not include the effect of land-use change, and furthermore, their non-tax neutral scenario models the effect of increasing the price of all food rather than just food

groups with above the average emissions. However, their estimate of the reduction in GHG emissions from food consumed in Denmark of between 4.0% and 7.9% using a tax rate of £19.10/tCO<sub>2</sub>e is comparable to the 7.5% reduction we observe in the equivalent scenario (a) with a tax rate of £27.20/tCO<sub>2</sub>e applied just to food groups with emissions greater than average.<sup>23</sup>

### Implications and future research

Scenario (a) is predicted to generate £2.03 billion revenue per annum. This represents a substantial amount of money that could be reinvested in GHG emission mitigation strategies in either the agriculture sector or elsewhere. However, revenue may also be spent on GHG producing projects that would otherwise have not been funded, thereby negating the reductions in GHG emissions seen with the changes in diet modelled here. Although our modelled tax scenarios lead to a healthier diet, scenario (a) would likely be economically regressive meaning that the poor spend proportionately more of their income on the tax than the rich. However, because those in lower socio-economic classes suffer from a greater prevalence of chronic disease<sup>50</sup> and are more sensitive to price changes,<sup>51</sup> the taxes are likely to be progressive in terms of health benefits. Further work should explicitly consider differential effects by socio-demographic group of internalising the societal cost of climate change in the food sector; this is not currently possible with our data. Our research also estimates a 14% reduction in lamb and beef consumption, which will have significant negative economic implications for some farmers. We have not accounted for these wider economic impacts; appropriate reinvestment of the tax revenue may help to mitigate the negative consequences.

We are using taxation to internalise much of the cost to society of GHG emissions as it is a readily grasped mechanism for changing prices; however, these price changes could be realised through a different mechanism, e.g. carbon trading schemes that incorporate all GHGs relevant to agriculture. The taxes modelled here are not unrealistic; the highest rate of tax is £0.176/100g beef, which represents a price increase of approximately 15%-35% (depending on quality and type of beef purchased). This price increase is not dissimilar to Mytton et al.'s estimate of a 20% increase in the price of 'unhealthy' foods to give a significant population health benefit,<sup>18</sup> and is significantly less than the current tax on cigarettes of 16.5% of retail plus a further £3.35 per 20 cigarettes.<sup>52</sup> As discussed by Mytton et al., taxation of unhealthy food as a public health measure is beginning to gain traction in the developed world<sup>18</sup> yet the jump to taxing foods with high GHG emissions is unlikely to happen soon. An appropriate next step would be to investigate the health and environmental impacts of a combined GHG emission and unhealthy food tax (for example implementing tax scenario (a) alongside a tax on soft drinks).

**Conclusions**

In the context of widespread global economic austerity and the estimated long term financial costs of carbon,<sup>35,53</sup> the health, economic, and environmental benefits make internalising these costs through a GHG emission tax on food a potential solution. Current projections estimate that the UK is unlikely to meet the 2050 target of an 80% reduction in GHG emissions set by the Climate Change Act<sup>7,8</sup> and large changes to the food chain supply system would be required to achieve just a 70% reduction in emissions from agriculture (not including land-use change).<sup>38</sup> The careful use of market governance mechanisms will have a crucial role in reducing global agriculture GHG emissions and our results show that taxation

offers a possible method to reduce GHG emissions, improve public health, and raise revenue simultaneously.

### **Funding**

None

### **Contributorship**

PS had the original idea for the study. AB coordinated the study, designed the study methodology and ran the modelling except for the calculation and application of price elasticities. RT designed the economic modelling for devising price elasticities. AK devised how to apply the tax strategy to price elasticities and ran the economic modelling. PS designed the model to determine health outcomes. AB wrote the initial draft of the manuscript. PS, AK, RT, TG, and MR all commented on and contributed to the study methodology and edited various drafts of the final manuscript.

### **Data sharing**

Price elasticity data are available from the authors on request. The values for all of the parameters in the DIETRON model, and the sources from which they are drawn, are provided in the supplementary data of an open access journal article and the complete model is available from the authors on request.

### **Competing Interests**

None

REFERENCES

1 Costello A, Abbas M, Allen A, *et al.* Managing the health effects of climate change: Lancet and University College London Institute for Global Health Commission. *The Lancet* 2009;**373**:1693–733.

2 Solomon S, Qin M, Manning M, *et al.* Section 2.10.2, Direct Global Warming Potentials, in Contribution of Working Group I to the Fourth Assessment Report of the Intergovernmental Panel on Climate Change. London: 2007. [http://www.ipcc.ch/publications\\_and\\_data/ar4/wg1/en/ch2s2-10-2.html](http://www.ipcc.ch/publications_and_data/ar4/wg1/en/ch2s2-10-2.html)

3 Bellarby J, Foereid B, Hastings A, *et al.* Cool farming: climate impacts of agriculture and mitigation potential. Amsterdam: 2008.

4 United Nations Environment Programme. Avoiding Future Famines: Strengthening the Ecological Foundation of Food Security through Sustainable Food Systems. Nairobi: 2012.

5 World Health Organisation. Protecting health from climate change. Geneva: 2009.

6 Brown K, Cardenas L, MacCarthy J, *et al.* UK Greenhouse Gas Inventory, 1990 to 2010. Annual report for submission under the Framework Convention on Climate Change. Didcot: 2012.

7 UK Government. Climate Change Act 2008. London: 2008. <http://www.legislation.gov.uk/ukpga/2008/27/contents>

8 Cambridge Econometrics. The decline in UK's carbon emissions is set to accelerate after 2020 as power generation, helped by a rising flood price of carbon on fossil fuel inputs, makes good progress towards decarbonisation. Cambridge: 2011. <http://www.camecon.com/uk/ukenergy/pressrelease-UKenergy.aspx>

9 Foresight. The future of food and farming. Final project report. London: 2011.

10 Foley JA, Ramankutty N, Brauman KA, *et al.* Solutions for a cultivated planet. *Nature* 2011;**478**:337–42.

11 World Health Organisation. Diet, Nutrition and the Prevention of Chronic Diseases. Technical Report Series 916. Geneva: 2003.

12 Micha R, Wallace S, Mozaffarian D. Red and processed meat consumption and risk of incident coronary heart disease, stroke and diabetes mellitus. A systematic review and meta-analysis. *Circulation* 2010;**121**:2271–83.

13 Pan A, Sun Q, Bernstein AM, *et al.* Red meat consumption and mortality: results from 2 prospective cohort studies. *Archives of Internal Medicine* 2012;**172**:555–63.

14 Chan DS, Lau R, Aune D, *et al.* Red and processed meat and colorectal cancer incidence: meta-analysis of prospective studies. *PLoS One* 2011;**6**:e20456.

- 1  
2  
3 15 Aune D, Chan DSM, Lau R, *et al.* Dietary fibre, whole grains, and risk of colorectal  
4 cancer: systematic review and dose-response meta-analysis of prospective studies. *The*  
5 *British Medical Journal* 2011;**343**:d6617.  
6  
7 16 Dauchet L, Amouyel P, Dallongeville J. Fruit and vegetable consumption and risk of  
8 stroke: a meta-analysis of cohort studies. *Neurology* 2005;**65**:1193–7.  
9  
10 17 Dauchet L, Amouyel P, Hercberg S, *et al.* Fruit and vegetable consumption and risk of  
11 coronary heart disease: a meta-analysis of cohort studies. *Journal of Nutrition*  
12 2006;**136**:2588–93.  
13  
14 18 Mytton O, Clarke D, Rayner M. Taxing unhealthy food and drinks to improve health.  
15 *The British Medical Journal* 2012;**344**:e2931.  
16  
17 19 Thow AM, Jan S, Leeder S, *et al.* The effect of fiscal policy on diet, obesity and  
18 chronic disease: a systematic review. *Bulletin of the World Health Organisation*  
19 2010;**88**:609–14.  
20  
21 20 Nnoaham KE, Sacks G, Rayner M, *et al.* Modelling income group differences in the  
22 health and economic impacts of targeted food taxes and subsidies. *International*  
23 *Journal of Epidemiology* 2009;**38**:1324–33.  
24  
25 21 Feng K, Hubacek K, Guan D, *et al.* Distributional effects of climate change taxation:  
26 the case of the UK. *Environmental Science and Technology* 2010;**44**:3670–6.  
27  
28 22 Wirsenius S, Hedenus F, Mohlin K. Greenhouse gas taxes on animal food products:  
29 Rationale, tax scheme and climate mitigation effects. *Climatic Change* 2011;**108**:159–  
30 84.  
31  
32 23 Edjabou L, Smed S. The effect of using consumption taxes on foods to promote  
33 climate friendly diets – The case of Denmark. *Food Policy* 2013;**39**:84–96.  
34  
35 24 McMichael AJ, Powles JW, Butler CD, *et al.* Food, livestock production, energy,  
36 climate change, and health. *The Lancet* 2007;**370**:1253–63.  
37  
38 25 Friel S, Dangour AD, Garnett T, *et al.* Public health benefits of strategies to reduce  
39 greenhouse-gas emissions: food and agriculture. *The Lancet* 2009;**374**:2016–25.  
40  
41 26 Garnett T. Cooking up a storm. Food, greenhouse gas emissions and our changing  
42 climate. Guildford: 2008.  
43  
44 27 Scarborough P, Allender S, Clarke D, *et al.* Modelling the health impact of  
45 environmentally sustainable dietary scenarios in the UK. *European Journal of Clinical*  
46 *Nutrition* 2012;**66**:710–5.  
47  
48 28 Vieux F, Soler L, Touazi D, *et al.* High nutritional quality is not associated with low  
49 greenhouse gas emissions in self-selected diets of French adults. *American Journal of*  
50 *Clinical Nutrition* 2013;**97**:569–83.  
51  
52  
53  
54  
55  
56  
57  
58  
59  
60

29 Saxe H, Larsen TM, Mogensen L. The global warming potential of two healthy Nordic diets compared with the average Danish diet. *Climatic Change* 2013;**116**:249–62.

30 Macdiarmid J, Kyle J, Horgan G, *et al.* Livewell: a balance of healthy and sustainable food choices. London: 2011.

31 Macdiarmid J, Kyle J, Horgan G, *et al.* Sustainable diets for the future: can we contribute to reducing greenhouse gas emissions by eating a healthy diet? *American Journal of Clinical Nutrition* 2012;**96**:632–9.

32 Aston LM, Smith JN, Powles JW. Impact of a reduced red and processed meat dietary pattern on disease risks and greenhouse gas emissions in the UK: a modelling study . *BMJ Open* 2012;**2** . doi:10.1136/bmjopen-2012-001072

33 Wilson N, Nghiem N, Ni Mhurchu C, *et al.* Foods and Dietary Patterns That Are Healthy, Low-Cost, and Environmentally Sustainable: A Case Study of Optimization Modeling for New Zealand. *PLoS ONE* 2013;**8**:e59648.

34 Moran D, MacLeod M, Wall E, *et al.* UK Marginal Abatement Cost Curves for the Agriculture and Land Use, Land-Use Change and Forestry Sectors out to 2022, with Qualitative Analysis of Options to 2050. Report to the Committee on Climate Change. London: 2008.

35 Stern N. Stern Review: The Economics of Climate Change. London: 2006.

36 Ackerman F, Stanton EA. Climate Risks and Carbon Prices: Revising the Social Cost of Carbon. *Economics: The Open-Access, Open Assessment E-Journal* 2012;**6**:2012–10.

37 Department for the Environment Food and Rural Affairs. Family Food 2010. London: 2011.

38 Audsley E, Brander M, Chatterton J, *et al.* How low can we go? An assessment of greenhouse gas emissions from the UK food system and the scope to reduce them by 2050. *Food Climate Research Network – WWF-UK* 2009.

39 FAOSTAT. The Statistics Division of the Food and Agriculture Organisation of the United Nations. 2012.<http://faostat.fao.org/> (accessed 7 Jun2013).

40 Tiffin R, Arnoult M. The demand for a healthy diet: estimating the almost ideal demand system with infrequency of purchase. *European Review of Agricultural Economics* 2010;**37**:501–21.

41 Scarborough P, Nnoaham K, Clarke D, *et al.* Modelling the impact of a healthy diet on cardiovascular disease and cancer mortality. *Journal of Epidemiology and Community Health* 2012;**66**:420–6.

42 Scarborough P, Morgan R, Webster P, *et al.* Differences in coronary heart disease, stroke and cancer mortality rates between England, Wales, Scotland and Northern Ireland: the role of diet and nutrition. *BMJ Open* 2011;**1**:e000263.

- 43 Department of Health. National Diet and Nutrition Survey Years 1 and 2, 2008/9 - 2009/10. 2011.
- 44 Department of Health. NHS Choices. Healthy eating. 2012.<http://www.nhs.uk/livewell/healthy-eating/Pages/Healthyeating.aspx> (accessed 6 Jun2013).
- 45 Office for National Statistics. Death registrations by single year of age, United Kingdom 2010. 2011.
- 46 Department for the Environment Food and Rural Affairs. Survey sampling for Family Food. London: 2011. <http://www.defra.gov.uk/statistics/files/defra-stats-foodfarm-food-methodology-sampling-111213.pdf>
- 47 Quested T, Parry A. New estimates for household food and drink waste in the UK. Banbury: 2011.
- 48 Andreyeva T, Chaloupka FJ, Brownell KD. Estimating the potential of taxes on sugar-sweetened beverages to reduce consumption and generate revenue. *Preventative Medicine* 2011;**52**:413–6.
- 49 Lin BH, Smith TA, Lee JY, *et al.* Measuring weight outcomes for obesity intervention strategies: the case of a sugar-sweetened beverage tax. *Economics and Human Biology* 2011;**9**:329–41.
- 50 Commission on the Social Determinants of Health. Closing the gap in a generation. Geneva: 2008.
- 51 Smed S, Jensen JD, Denver S. Socioeconomic characteristics and the effect of taxation as a health policy instrument. *Food Policy* 2007;**32**:624–39.
- 52 Her Majesty's Revenue and Customs. Tobacco products duty. 2012.<http://www.hmrc.gov.uk/rates/tobacco-duty.htm> (accessed 7 Jun2013).
- 53 Price R, Thornton S, Nelson S. The Social Cost Of Carbon and the Shadow Price Of Carbon: what they are, and how to use them in economic appraisal in the UK. London: 2007.

1  
2  
3  
4  
5  
6  
7  
8  
9  
10  
11  
12  
13  
14  
15  
16  
17  
18  
19  
20  
21  
22  
23  
24  
25  
26  
27  
28  
29  
30  
31  
32  
33  
34  
35  
36  
37  
38  
39  
40  
41  
42  
43  
44  
45  
46  
47  
48  
49  
50  
51  
52  
53  
54  
55  
56  
57  
58  
59  
60

**FIGURE LEGEND**

**Figure 1. DIETRON model conceptual framework**

The figure demonstrates relationships between different components of the DIETRON comparative risk assessment model. Model inputs are to the left of the figure with outcomes on the right and mediating factors in the middle. Solid lines represent a negative health relationship and dashed lines represent a positive relationship.

For peer review only

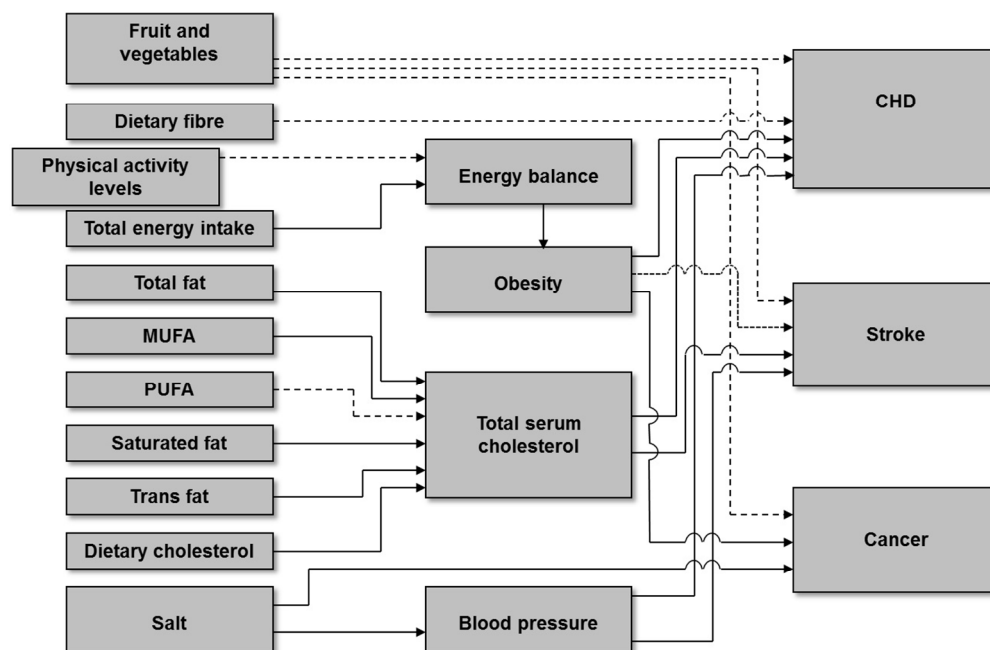

The figure demonstrates relationships between different components of the DIETRON comparative risk assessment model. Model inputs are to the left of the figure with outcomes on the right and mediating factors in the middle. Solid lines represent a negative health relationship and dashed lines represent a positive relationship.

223x145mm (150 x 150 DPI)

1  
2  
3  
4  
5  
6  
7  
8  
9  
10  
11  
12  
13  
14  
15  
16  
17  
18  
19  
20  
21  
22  
23  
24  
25  
26  
27  
28  
29  
30  
31  
32  
33  
34  
35  
36  
37  
38  
39  
40  
41  
42  
43  
44  
45  
46  
47  
48  
49  
50  
51  
52  
53  
54  
55  
56  
57  
58  
59  
60

**Supplementary table**

Modeling the Impact on Chronic Disease of Incorporating the Societal Cost of  
Greenhouse Gases into the Price of Food

Adam DM Briggs

Ariane Kehlbacher

Richard Tiffin

Tara Garnett

Mike Rayner

Peter Scarborough

**Contents**

|                             |   |
|-----------------------------|---|
| Supplemental Table, S1..... | 2 |
| Reference.....              | 3 |

**Supplementary Table, S1. Number of people in the UK consuming less than the recommended daily intake of micronutrients following tax scenarios (a) and (b) (000s).**

|                         | Recommended<br>daily intake <sup>1</sup> | Baseline | Scenario (a)<br>(95% CIs)    | Scenario (b)<br>(95% CIs)    |
|-------------------------|------------------------------------------|----------|------------------------------|------------------------------|
| Iron (mg/day)           | Female: 14.8;<br>Male: 8.7               | 37,119   | 38,170 (37,664<br>to 38,681) | 37,077 (36,543<br>to 37,614) |
| Calcium (mg/day)        | 700                                      | 16,507   | 17,033 (16,668<br>to 17,411) | 15,334 (14,973<br>to 15,710) |
| Zinc (mg/day)           | Female: 4-7;<br>Male: 5.5-9.5            | 18,361   | 19,874 (19,509<br>to 20,253) | 18,896 (18,536<br>to 19,255) |
| Vitamin A (µg /day)     | Female: 600;<br>Male: 700                | 23,982   | 25,021 (24,849<br>to 25,199) | 24,399 (24,232<br>to 24,574) |
| Vitamin B12<br>(µg/day) | 1.5                                      | 624      | 714 (698 to<br>732)          | 629 (612 to<br>646)          |

Assumes 2010 UK population of 62,262,000. CI, credible intervals

1  
2  
3  
4  
5  
6  
7  
8  
9  
10  
11  
12  
13  
14  
15  
16  
17  
18  
19  
20  
21  
22  
23  
24  
25  
26  
27  
28  
29  
30  
31  
32  
33  
34  
35  
36  
37  
38  
39  
40  
41  
42  
43  
44  
45  
46  
47  
48  
49  
50  
51  
52  
53  
54  
55  
56  
57  
58  
59  
60

Reference

1     Department of Health. NHS Choices. Healthy eating.  
2012.<http://www.nhs.uk/livewell/healthy-eating/Pages/Healthyeating.aspx>  
(accessed 6 Jun2013).

For peer review only



**Assessing the Impact on Chronic Disease of Incorporating  
the Societal Cost of Greenhouse Gases into the Price of  
Food: an Econometric and Comparative Risk Assessment  
Modelling Study**

|                                 |                                                                                                                                                                                                                                                                                                                                                                                                                                                                                                                |
|---------------------------------|----------------------------------------------------------------------------------------------------------------------------------------------------------------------------------------------------------------------------------------------------------------------------------------------------------------------------------------------------------------------------------------------------------------------------------------------------------------------------------------------------------------|
| Journal:                        | <i>BMJ Open</i>                                                                                                                                                                                                                                                                                                                                                                                                                                                                                                |
| Manuscript ID:                  | bmjopen-2013-003543.R1                                                                                                                                                                                                                                                                                                                                                                                                                                                                                         |
| Article Type:                   | Research                                                                                                                                                                                                                                                                                                                                                                                                                                                                                                       |
| Date Submitted by the Author:   | 05-Sep-2013                                                                                                                                                                                                                                                                                                                                                                                                                                                                                                    |
| Complete List of Authors:       | Briggs, Adam; University of Oxford, Nuffield Department of Population Health<br>Kehlbacher, Ariane; University of Reading, School of Agriculture, Policy and Development<br>Tiffin, Richard; University of Reading, School of Agriculture, Policy and Development<br>Garnett, Tara; University of Oxford, Environmental Change Institute<br>Rayner, Mike; University of Oxford, Nuffield Department of Population Health<br>Scarborough, Peter; University of Oxford, Nuffield Department of Population Health |
| <b>Primary Subject Heading</b>: | Public health                                                                                                                                                                                                                                                                                                                                                                                                                                                                                                  |
| Secondary Subject Heading:      | Health policy, Nutrition and metabolism, Occupational and environmental medicine                                                                                                                                                                                                                                                                                                                                                                                                                               |
| Keywords:                       | PUBLIC HEALTH, Health policy < HEALTH SERVICES ADMINISTRATION & MANAGEMENT, NUTRITION & DIETETICS, EPIDEMIOLOGY                                                                                                                                                                                                                                                                                                                                                                                                |
|                                 |                                                                                                                                                                                                                                                                                                                                                                                                                                                                                                                |

SCHOLARONE™  
Manuscripts

**TITLE**

Assessing the Impact on Chronic Disease of Incorporating the Societal Cost of Greenhouse Gases into the Price of Food: an Econometric and Comparative Risk Assessment Modelling Study

**AUTHORS**

Adam DM Briggs<sup>a</sup>, Ariane Kehlbacher<sup>b</sup>, Richard Tiffin<sup>b</sup>, Tara Garnett<sup>c</sup>, Mike Rayner<sup>a</sup>, Peter Scarborough<sup>a</sup>

**AFFILIATIONS**

a British Heart Foundation Health Promotion Research Group, Nuffield Department of Population Health, University of Oxford, Oxford, UK

b School of Agriculture, Policy and Development, University of Reading, Reading, UK

c Food Climate Research Network, University of Oxford, Oxford, UK

**CORRESPONDENCE TO:**

Adam Briggs, British Heart Foundation Health Promotion Research Group, Nuffield Department of Population Health, University of Oxford, Oxford. UK. OX3 7LF.

Email: [adam.briggs@dph.ox.ac.uk](mailto:adam.briggs@dph.ox.ac.uk)

Phone: +44 1865 289200

**KEYWORDS**

Nutrition, taxation, greenhouse gas emissions, chronic disease

**WORD COUNT**

5148

## ABSTRACT

### Objectives

To model the impact on chronic disease of a tax on UK food and drink that internalises the wider costs to society of greenhouse gas emissions, and to estimate the potential revenue.

### Design

An econometric and comparative risk assessment modelling study

### Setting

UK

### Participants

UK adult population

### Interventions

Two tax scenarios are modelled:

- (a) a tax of £2.72/tonne carbon dioxide equivalents (tCO<sub>2</sub>e)/100g product applied to all food and drink groups with above average greenhouse gas emissions.
- (b) as with scenario (a) but food groups with emissions below average are subsidised to create a tax neutral scenario.

### Outcome measures

Primary outcomes are change in UK population mortality from chronic diseases following the implementation of each taxation strategy, the change in UK greenhouse gas emissions, and the predicted revenue.

Secondary outcomes are the changes to the micronutrient composition of the UK diet.

**Results**

Scenario (a) results in 7,770 (95% credible intervals: 7,150 to 8,390) deaths averted and a reduction in GHG emissions of 18,683 (14,665 to 22,889) ktCO<sub>2</sub>e per year. Estimated annual revenue is £2.02 (£1.98 to £2.06) billion.

Scenario (b) results in 2,685 (1,966 to 3,402) extra deaths and a reduction in GHG emissions of 15,228 (11,245 to 19,492) ktCO<sub>2</sub>e per year.

**Conclusions**

Incorporating the societal cost of greenhouse gases into the price of foods could save 7,770 lives in the UK each year, reduce food-related GHG emissions, and generate substantial tax revenue. The revenue neutral scenario (b) demonstrates that sustainability and health goals are not always aligned. Future work should focus on investigating the health impact by population subgroup and on designing fiscal strategies to promote both sustainable and healthy diets.

## ARTICLE SUMMARY

### Article focus

- Climate change has been described as ‘the biggest global health threat of the 21<sup>st</sup> century’ and agriculture contributes up to 32% of global greenhouse gas emissions.
- Taxation based on greenhouse gas (GHG) emissions is a potential mechanism for internalising the wider costs of climate change to society.
- This study models the impact of taxing food and drink based on their greenhouse gas emissions to estimate the effect on health of diets low in greenhouse gas emissions.

### Key messages

- Incorporating the societal cost of greenhouse gases into the price of foods could significantly improve population health at the same time as reducing food-related GHG emissions, and generating substantial tax revenue.
- However, health and sustainability goals are not always aligned and there is the potential to worsen population health when subsidising food and drink products low in greenhouse gas emissions.

### Strengths and limitations of the study

- This study uses the best currently available datasets to estimate the effects of a taxation strategy on both the taxed product, as well as on substituting and complementing products.
- The data on UK greenhouse gas emissions for different food groups are not complete meaning that for some foods, levels of emissions were estimated from related food groups or constituent ingredients.
- Due to limitations of the economic data, this study is not able to estimate the health impact by different subgroups of society, such as socioeconomic group.

1  
2  
3  
4  
5  
6  
7  
8  
9  
10  
11  
12  
13  
14  
15  
16  
17  
18  
19  
20  
21  
22  
23  
24  
25  
26  
27  
28  
29  
30  
31  
32  
33  
34  
35  
36  
37  
38  
39  
40  
41  
42  
43  
44  
45  
46  
47  
48  
49  
50  
51  
52  
53  
54  
55  
56  
57  
58  
59  
60

**FUNDING STATEMENT**

This research received no specific grant from any funding agency in the public, commercial or not-for-profit sectors.

**COMPETING INTERESTS**

None declared

**AUTHORS' CONTRIBUTIONS**

PS had the original idea for the study. AB coordinated the study, designed the study methodology and ran the modelling except for the calculation and application of price elasticities. RT designed the economic modelling for devising price elasticities. AK devised how to apply the tax strategy to price elasticities and ran the economic modelling. PS designed the model to determine health outcomes. AB wrote the initial draft of the manuscript. PS, AK, RT, TG, and MR all commented on and contributed to the study methodology and edited various drafts of the final manuscript.

**DATA SHARING STATEMENT**

Price elasticity data are available from the authors on request. The values for all of the parameters in the DIETRON model, and the sources from which they are drawn, are provided in the supplementary data of an open access journal article and the complete model is available from the authors on request.

## INTRODUCTION

Climate change has been described as ‘the biggest global health threat of the 21<sup>st</sup> century’ with rising global temperatures projected to alter disease patterns, increase food and water insecurity, and lead to extreme climatic events.<sup>1</sup> Globally, agriculture is thought to directly contribute to between 10 and 12% of total greenhouse gas (GHG) emissions, and up to 32% of global emissions if land-use change is included.<sup>2,3</sup> The need for sustainable food systems to address climate change has been highlighted by both the United Nations (UN) and the World Health Organization (WHO).<sup>4,5</sup>

In the UK, the 2010 annual GHG inventory report submitted to the United Nations Framework Convention on Climate Change estimates that 46.2 million tonnes of carbon dioxide equivalents (tCO<sub>2</sub>e), approximately 8% of GHG emissions produced in the UK, are related to agriculture.<sup>6</sup> The Climate Change Act was passed by the UK government in 2008 to reduce the UK’s GHG emissions by 80% by 2050 from 1990 levels,<sup>7</sup> although projections indicate that the interim target of a 50% reduction by 2027 is unlikely to be achieved.<sup>8</sup> Recent reviews have suggested that substantial reductions in GHG emissions from agriculture are unlikely through technological improvements alone, and will require changes in food consumption patterns.<sup>9,10</sup>

### Food, tax, and health

In the developed world, obesity is a major health problem and is associated with diseases such as diabetes, cardiovascular disease, and some cancers.<sup>11</sup> Furthermore, high intake of specific food groups, such as red and processed meat are also associated with ill-health.<sup>12–14</sup> Conversely, high intake of other food groups, such as fruit and vegetables, protect against ill-health.<sup>15–17</sup>

Countries are increasingly using taxation to change population eating habits and improve health; examples include the recently withdrawn tax on saturated fat in Denmark, a tax on a variety of unhealthy foods in Hungary, and a tax on sweetened drinks in France.<sup>18</sup> The majority of studies investigating the relationship between food taxation and health are based on modelling, which offers the flexibility to illustrate a range of scenarios.<sup>19</sup> In modelling taxes, it is important to account for the effect of substituting with other foods as there is the potential that taxes designed to improve health may inadvertently do the opposite, for example by heavily taxing saturated fat, people may then consume more salt.<sup>20</sup> In summarising the current evidence from trials and modelling studies, a review by Mytton et al. suggests that any tax would need to be 20% or higher to have a significant impact on purchasing patterns and population health.<sup>18</sup>

A tax on foods associated with high GHG emissions could potentially help to internalise the wider cost of GHGs to society, however it is unclear whether such a tax would have beneficial or harmful side-effects on health.<sup>21–23</sup> Other studies have explored the potential health implications of diets that reduce GHG emissions;<sup>23–33</sup> however, many of these have modelled arbitrary changes in diet that may not reflect possible changes in consumption (e.g. replacing red meat with fruit and vegetables).<sup>24–27</sup> Other studies that have investigated more realistic dietary scenarios do not offer a mechanism to change population dietary habits.<sup>28–32</sup> Wilson et al. identified dietary patterns that were low cost, low in GHG emissions, and beneficial for health, and suggest that fiscal measures may be an appropriate mechanism by which to alter New Zealand dietary habits.<sup>33</sup> Edjabou and Smed are the only authors to have previously modelled the impact on health of internalising the cost of GHG emissions through taxation.<sup>23</sup> The authors investigated the impact of raising the price of food by either 756 DKK

(£86) or 260 DKK (£30) per tonne of carbon dioxide equivalents (tCO<sub>2</sub>e) on Danish population saturated fat and sugar consumption. However, the magnitude of any subsequent health effects is not quantified.<sup>23</sup>

In order to account for, and internalise, the wider costs to society of climate change from food production and consumption in the UK, we model the effect of a UK GHG emission food tax on health. Two scenarios are modelled: the first taxes food groups with GHG emissions greater than average, and the second taxes high GHG emission food groups and subsidises those with low emissions to create a revenue-neutral scenario. We show that internalising the costs of GHG emissions in the food system has the potential to reduce GHG emissions, generate significant revenue, and save lives.

**METHODS**

We use a five-step method to model the impact of a GHG emission food tax on the health of the UK population (as measured by annual deaths averted or delayed, see figure 1).

**Step 1 – set the tax rates**

The modelled tax rates are based on the UK government’s Department for Environment, Food and Rural Affairs (Defra) agriculture marginal abatement cost curve (MACC) by Moran et al., adjusted to 2010 prices.<sup>34</sup> MACCs are used to prioritise the implementation of GHG abatement strategies. They plot the impact on GHG emissions of different interventions in the order of cost-effectiveness thereby allowing the user to visualise the cost (or savings) of reducing emissions by a specific amount using a given intervention. By plotting the cost-effectiveness of different strategies to reduce GHG emissions from agriculture, the agriculture MACC suggests that investment of £24.10/tCO<sub>2</sub>e (£27.19/tCO<sub>2</sub>e, 2010 prices) can reduce UK agricultural GHG emissions by 7,850 ktCO<sub>2</sub>e (16.2%), with the next most cost-effective abatement strategy costing significantly more (£174.22/tCO<sub>2</sub>e, £196.60/tCO<sub>2</sub>e, 2010 prices).<sup>34</sup> The specific tax level chosen for this analysis corresponds with the threshold identified in the MACC that allows for substantial reductions of GHG emissions at a cost of £24.10/tCO<sub>2</sub>e (£27.19/tCO<sub>2</sub>e, 2010 prices). The tax rate selected is also similar to the social cost of carbon for the UK economy of £21-£25/tCO<sub>2</sub>e (2010 prices) calculated by the Stern Review<sup>35</sup> although it should be noted that estimations of the cost to society of GHG emissions vary markedly.<sup>36</sup>

Two illustrative scenarios are modelled to investigate the impact on health, change in UK GHG emissions, and revenue generated from a GHG emission tax on food:

- (a) GHG emissions tax of £2.72/tCO<sub>2</sub>e/100g product applied to all food groups with emissions greater than 0.41 kgCO<sub>2</sub>e/100g, the mean level of emissions across all food groups;
- (b) as with (a) but using revenue generated to subsidise food groups with emissions lower than 0.41 kgCO<sub>2</sub>e/100g to create a cost-neutral scenario.

The rate of subsidy in scenario (b) was calculated by applying the tax rate of £2.72 tCO<sub>2</sub>e/100g product to the difference between the mean GHG emissions (0.41 kgCO<sub>2</sub>e/100g) and the GHG emissions for each food group with emissions below average.

### **Step 2 – identify baseline consumption data**

Current UK food consumption patterns are taken from the Living Costs and Food Survey (LCF) for 2010, to provide the baseline level of food purchasing prior to the application of a tax.<sup>37</sup> The LCF is a survey of purchasing data for 256 food categories compiled from two-week long food expenditure diaries of 12,196 people (5,263 households) from across the UK. The survey measures purchasing habits and we assumed that all food purchased is consumed.

### **Step 3 – identify greenhouse gas emissions for each food group**

GHG emissions for different food types, measured as kg of CO<sub>2</sub>e produced for a kg of product, are taken from Audsley et al., the only study to have collated a near complete set of UK specific GHG emissions for a wide range of food types from the literature.<sup>38</sup> Emissions are divided into three categories: primary production; processing, distribution, retail, and preparation; and land-use change.

To derive the level of the tax for each food type, we use the GHG emissions from primary production (up to the retail distribution centre – pre-RDC) and land-use change, and not emissions from processing, distribution, retail, and preparation (post-RDC); although the exact distinction of where production stops and processing begins varies slightly between different food groups (see Audsley *et al.* 2009).<sup>38</sup> This is because post-RDC emissions for individual food types are not available. Furthermore, post-RDC emissions result from the consumer’s travel to buy the food and how the consumer chooses to cook the product. These decisions are as much influenced by the price of fuel and electricity, as food. On a conservative basis, we assume that food purchased in restaurants (not including takeaway meals) will not change in price as a result of the tax (eating out in 2010 contributed only 11% of daily calorie intake).<sup>37</sup>

Pre-RDC emissions for food categories in the LCF are weighted by the proportion of food consumed in the UK that is domestically produced, imported from Europe, and imported from elsewhere in the world using consumption and import data from Food Balance Sheets published by the Statistics Division of the Food and Agriculture Organization of the United Nations.<sup>39</sup>

Where FAOSTAT food types do not exactly match the food categories used in the LCF, the food categories are either assigned emissions (and therefore a tax rate) of a weighted average of the food comprising that group (e.g. fresh fruit), the same emissions as the primary ingredient in the group (e.g. bread/cereals/flour are assigned the emissions of wheat), or the emissions of the closest constituent ingredient (e.g. cheese is assigned the same emissions as butter).

The GHG emissions for each food type in kgCO<sub>2</sub>e/kg product are the sum of pre-RDC emissions (weighted by the proportions domestically produced and imported) and land-use change related emissions.

#### Step 4 – apply price elasticities

Price elasticities predict the percentage change in the amount of a food purchased, and of its substitute and complementary foods, following a one per cent change in price. UK specific price elasticities are derived for food categories from the LCF, 2010 using methods described in Tiffin and Arnoult.<sup>40</sup> Using three-stage budgeting, we estimate unconditional price elasticities for 29 different food groups into which each of the 256 food categories of the LCF are allocated. The own- and cross-price elasticities used in this study are available from the authors on request. These are then used to predict change in purchasing, and therefore nutritional composition of the diet and annual tax revenue generated following tax scenarios (a) and (b) (table 1). The annual revenue generated by tax scenario (a) is calculated by scaling up the post-tax per person food intake from the LCF to the UK population and multiplying it by the tax per kg of each food group.

**Table 1. Food groups for which price-elasticities are estimated, and the levels of taxation applied to each food group for tax scenarios (a) and (b).**

| Food group                      | GHG emissions/<br>kg product (kgCO <sub>2</sub> e) | Tax/kg product in £ |              |
|---------------------------------|----------------------------------------------------|---------------------|--------------|
|                                 |                                                    | Scenario (a)        | Scenario (b) |
| Milk                            | 1.8                                                | 0                   | -0.06        |
| Other milk products             | 2.4                                                | 0                   | -0.05        |
| Cream                           | 2.4                                                | 0                   | -0.05        |
| Cheese                          | 1.8                                                | 0                   | -0.06        |
| Eggs                            | 4.9                                                | 0.02                | 0.02         |
| Pork                            | 7.9                                                | 0.10                | 0.10         |
| Beef                            | 68.8                                               | 1.76                | 1.76         |
| Poultry                         | 5.4                                                | 0.04                | 0.04         |
| Lamb                            | 64.2                                               | 1.63                | 1.63         |
| Other meat                      | 35.9                                               | 0.86                | 0.86         |
| Fish                            | 5.4                                                | 0.03                | 0.03         |
| Bread/cereals/flour             | 1.0                                                | 0                   | -0.08        |
| Cakes/buns/pastries/biscuits    | 0.9                                                | 0                   | -0.09        |
| Animal fats                     | 35.6                                               | 0.86                | 0.86         |
| Vegetable fats                  | 3.2                                                | 0                   | -0.02        |
| Sugar and preserves             | 0.1                                                | 0                   | -0.11        |
| Sweets                          | 0.1                                                | 0                   | -0.11        |
| Tinned and dried fruit and nuts | 0.9                                                | 0                   | -0.09        |
| Fresh fruit                     | 0.9                                                | 0                   | -0.09        |

|                       |      |      |       |
|-----------------------|------|------|-------|
| Potatoes              | 0.4  | 0    | -0.10 |
| Canned vegetables     | 1.6  | 0    | -0.07 |
| Fresh vegetables      | 1.6  | 0    | -0.07 |
| Fruit juice           | 0.9  | 0    | -0.09 |
| Soft drinks           | 0.1  | 0    | -0.11 |
| Non-coffee hot drinks | 3.0  | 0    | -0.03 |
| Coffee drinks         | 10.1 | 0.16 | 0.16  |
| Beer                  | 3.8  | 0    | -0.01 |
| Wine                  | 1.0  | 0    | -0.08 |
| Other                 | 3.3  | 0    | -0.02 |

GHG, greenhouse gas emissions; kgCO<sub>2</sub>e, kg of carbon dioxide equivalents

The 95% credible intervals of the post-tax estimates of the reduction in GHG emissions, revenue generated, and nutritional composition of the diet reflect the uncertainty surrounding the price elasticity estimates. Elasticities are estimated using a Markov Chain Monte Carlo procedure with 12,000 iterations and a burn-in of 2,000.

### Step 5 – identify population health implications of diet post tax

The effects of the introduction of a food based GHG emission tax on health are modelled using the DIETRON comparative risk assessment model to derive changes in mortality and identify the numbers of deaths averted with each scenario.<sup>41</sup> The DIETRON model uses age- and sex-specific relative risk estimates from meta-analyses to link the consumption of different food categories to mortality (figure 2). Dietary input data are grams/day of fruit, vegetables, salt, and fibre, per cent of total energy derived from total fat, monounsaturated

fatty acids, polyunsaturated fatty acids, saturated fatty acids, trans fatty acids, and dietary cholesterol, and total energy intake in kilocalories/day (kcal/day).<sup>41</sup> Changes in the mortality burden of coronary heart disease, stroke, and cancer are modelled via the intermediary risk factors of blood pressure, blood cholesterol, and obesity. The DIETRON model derives 95% credible intervals using 5,000 iterations of a Monte Carlo analysis to account for the uncertainty of the relationship between the dietary changes and mortality outcomes reported in the literature. The values for all of the parameters in the DIETRON model, and the sources from which they are drawn, are provided in the supplementary data of an open access journal article and the complete model is available from the authors on request.<sup>42</sup>

Following the change in UK population diet, the number of people consuming less than the recommended daily intake of vitamins A and B12, calcium, iron, and zinc are estimated. Consumption of micronutrients are assumed to follow a log-normal distribution with mean and standard deviation taken from the National Diet and Nutrition Survey (NDNS) years 1 and 2 (2008/9 – 2009/10).<sup>43</sup> NDNS collects four-day food diaries for 2126 participants as well as blood samples to help assess nutritional status; when calculating the distributions we used total micronutrients consumed including supplements. Where recommended daily intakes vary between men and women, the average is used.<sup>44</sup>

## RESULTS

Table 2 shows that following tax scenarios (a) and (b) the largest changes in consumption occurred with beef (14.2% reduction in scenario (a), 13.7% in scenario (b)) and lamb (14.1% and 13.9% reductions in scenarios (a) and (b) respectively). Unlike scenario (a), scenario (b) led to increases in the consumption of milk, fruit juice, fresh fruit, and potatoes by more than 4%. Scenario (b) also resulted in a 5.0% increase in sugar and preserves consumption and a 12.9% increase in soft drink consumption (compared to a 0.2% non-significant reduction in scenario (a)).

**Table 2. Percentage change in consumption of different food groups following the implementation of tax scenarios (a) and (b).**

| Food group          | Scenario (a) (95% CIs)                | Scenario (b) (95% CIs)    |
|---------------------|---------------------------------------|---------------------------|
|                     | Total change in quantity consumed (%) |                           |
| Milk                | -0.25 (-0.44 to -0.06)                | +6.19 (+5.11 to +7.26)    |
| Other milk products | -0.24 (-0.41 to -0.61)                | +1.79 (+1.29 to +2.28)    |
| Cream               | -0.03 (-0.13 to +0.06)                | +0.15 (-1.42 to +1.71)    |
| Cheese              | -0.19 (-0.32 to -0.07)                | +0.86 (+0.47 to +1.25)    |
| Eggs                | -0.51 (-0.76 to -0.25)                | -0.19 (-1.20 to +0.82)    |
| Pork                | -1.20 (-1.51 to -0.89)                | -0.67 (-1.04 to -0.31)    |
| Beef                | -14.22 (-17.88 to -10.56)             | -13.71 (-17.35 to -10.01) |
| Poultry             | -0.23 (-0.53 to +0.07)                | -0.30 (-0.06 to +0.67)    |
| Lamb                | -14.14 (-23.78 to -4.51)              | -13.91 (-23.55 to -4.27)  |
| Other meat          | -9.81 (-11.22 to -8.39)               | -9.13 (-10.55 to -7.71)   |
| Fish                | -0.95 (-1.89 to -0.00)                | -0.43 (-1.07 to +0.20)    |

|                                         |                           |                           |
|-----------------------------------------|---------------------------|---------------------------|
| Bread, cereals, flour, and other starch | -0.35 (-0.52 to -0.19)    | +2.21 (+1.83 to +2.59)    |
| Cakes, buns, pastries, and biscuits     | -0.29 (-0.44 to -0.15)    | +1.29 (+0.93 to +1.65)    |
| Animal fats                             | -13.25 (-16.10 to -10.40) | -13.32 (-16.26 to -10.37) |
| Vegetable fats                          | +1.09 (-0.19 to +2.36)    | +1.62 (+0.20 to +3.05)    |
| Sugar and preserves                     | -0.14 (-0.64 to +0.35)    | +5.04 (+4.46 to +5.63)    |
| Sweets                                  | -0.20 (-0.61 to +0.20)    | +0.91 (+0.17 to +1.66)    |
| Tinned and dried fruit, and nuts        | +0.07 (-0.04 to +0.17)    | +0.96 (+0.60 to +1.31)    |
| Fresh fruit                             | +0.18 (-0.08 to +0.43)    | +3.49 (+2.79 to +4.18)    |
| Potatoes                                | -0.27 (-0.38 to -0.15)    | +3.08 (+2.68 to +3.49)    |
| Canned vegetables                       | -0.36 (-0.50 to -0.22)    | +1.67 (+1.32 to +2.02)    |
| Fresh vegetables                        | -0.41 (-0.56 to -0.26)    | +2.39 (+1.96 to +2.82)    |
| Fruit juice                             | -0.12 (-0.26 to +0.03)    | +9.97 (+7.61 to +12.32)   |
| Soft drinks                             | -0.20 (-0.45 to +0.04)    | +12.95 (+11.16 to +14.74) |
| Non-coffee drinks                       | -0.16 (-0.37 to +0.05)    | +0.26 (-0.29 to +0.82)    |
| Coffee drinks                           | -1.20 (-1.41 to -0.99)    | -1.11 (-1.71 to -0.51)    |
| Beer                                    | -0.13 (-0.54 to +0.29)    | +0.06 (-0.70 to +0.82)    |
| Wine                                    | -0.15 (-0.63 to +0.33)    | +0.77 (-0.12 to +1.66)    |
| Other alcoholic beverages               | -0.12 (-0.52 to +0.28)    | -0.07 (-0.80 to +0.66)    |

CI, confidence interval

Tax scenario (a) predicted a change in energy intake from 2,027 kcals/day to 1,999 kcals/day (95% credible intervals: 1,997 kcals/day to 2,002 kcals/day), a 1.4% reduction (table 3).

There were also overall reductions in consumption of cholesterol, saturated fatty acids, polyunsaturated fatty acids, and total fat, and in zinc, vitamin A, and vitamin B12 by more

than 2% (mean levels of zinc, vitamin A, and vitamin B12 remained above the UK daily recommended intake). All other nutrients and dietary constituents increased or decreased by less than 2%.

Tax scenario (b) resulted in an increase in calorie consumption from 2,027kcal/day to 2,048kcal/day (2,044kcal/day to 2,052kcal per day), a 1.0% increase (table 3). In this scenario there was a reduction in cholesterol consumption of 2.2%, and increases in consumption of fruit and vegetables, calcium, and sugar of over 2%. The remaining nutrients did not vary from baseline by more than 2%.

**Table 3. Nutrient composition of baseline diet and diets following tax scenarios (a) and (b), alongside UK recommended daily intakes.**

|                   | Baseline | Scenario (a)<br>(95% CIs) | Scenario (b)<br>(95% CIs) | Recommended<br>daily intake <sup>44</sup> |
|-------------------|----------|---------------------------|---------------------------|-------------------------------------------|
| Energy (kcal/day) | 2,027    | 1,999 (1,997 to 2,002)    | 2,048 (2,044 to 2,051)    | Female: 2,000;<br>Male: 2,500             |
| Total fat (g/day) | 84.2     | 82.4 (82.2 to 82.6)       | 83.6 (83.4 to 83.9)       |                                           |
| SAFAs (g/day)     | 32.5     | 31.6 (31.5 to 31.7)       | 32.1 (32.0 to 32.2)       | Female: <20;<br>Male: <30                 |
| MUFAs (g/day)     | 31.0     | 30.3 (30.2 to 30.4)       | 30.7 (30.6 to 30.8)       |                                           |
| PUFAs (g/day)     | 15.3     | 15.2 (15.1 to 15.2)       | 15.4 (15.3 to 15.4)       |                                           |

|                              |       |                        |                        |                               |
|------------------------------|-------|------------------------|------------------------|-------------------------------|
| Cholesterol (mg/day)         | 230.0 | 222.6 (221.8 to 223.3) | 225.1 (224.1 to 226.0) |                               |
| Fibre (g/day)                | 13.1  | 13.1 (13.0 to 13.1)    | 13.4 (13.4 to 13.4)    | 18                            |
| Salt (g/day)                 | 6.3   | 6.2 (6.2 to 6.2)       | 6.3 (6.3 to 6.3)       | 6                             |
| Fruit and vegetables (g/day) | 344.2 | 343.6 (343.2 to 344.1) | 355.9 (354.4 to 357.3) | 400                           |
| Iron (mg/day)                | 10.6  | 10.4 (10.4 to 10.4)    | 10.6 (10.6 to 10.7)    | Female: 14.8;<br>Male: 8.7    |
| Calcium (mg/day)             | 889.1 | 884.3 (883.4 to 885.2) | 915.1 (911.9 to 918.5) | 700                           |
| Zinc (mg/day)                | 8.2   | 8.0 (8.0 to 8.0)       | 8.2 (8.1 to 8.2)       | Female: 4-7;<br>Male: 5.5-9.5 |
| Vitamin A (µg /day)          | 803.6 | 778.4 (775.6 to 780.9) | 793.7 (790.6 to 796.6) | Female: 600;<br>Male: 700     |
| Vitamin D (µg /day)          | 2.7   | 2.6 (2.6 to 2.6)       | 2.7 (2.7 to 2.7)       | Variable                      |
| Vitamin B12 (µg/day)         | 5.7   | 5.6 (5.6 to 5.6)       | 5.8 (5.7 to 5.8)       | 1.5                           |
| Total sugar (g/day)          | 115.4 | 115.0 (114.9 to 115.2) | 120.3 (119.8 to 120.6) |                               |

SAFAs, saturated fatty acids; MUFAs, mono-unsaturated fatty acids; PUFAs, poly-unsaturated fatty acids; CI, credible interval

Following changes in nutrient consumption, tax scenarios (a) and (b) predict shifts in the number of people consuming below the recommended daily amounts of dietary micronutrients (supplementary table S1).<sup>44</sup> Following tax scenario (a), over 900,000 extra

people consumed less than the recommended daily intake of vitamin A, zinc, and iron. Tax scenario (b) predicted 1,507,000 extra people would be consuming greater than the recommended daily intake of calcium.

Scenario (a) predicted 7,768 deaths delayed or averted in the UK population per year (95% credible intervals: 7,151 deaths to 8,382 deaths), and 2,448 delayed or averted in people under 75 years old (table 4). Most of the reduction in deaths was due to fewer calories consumed; this leads to changes in population obesity prevalence and a lower burden of cardiovascular disease (tables 4 and 5). If energy intake were to have stayed the same, the improvement in dietary quality would have led to 1,207 deaths (1,003 to 1,431) delayed or averted.

Scenario (b) predicted an increase in deaths in the UK population of 2,685 (1,966 to 3,402), and of 477 in those less than 75 years old (table 4). The increase in deaths was due to increased calories consumed, again leading to a change in obesity prevalence and a greater burden of cardiovascular disease (tables 4 and 5). If energy intake were to have stayed the same, the increase in dietary quality would have led to 2,536 (2,195 to 2,896) deaths delayed or averted.

**Table 4. Total deaths delayed or averted by age, and deaths delayed or averted from nutritional changes in the diet following taxation scenarios (a) and (b)<sup>a</sup>.**

|  | Deaths averted or delayed, scenarios (a) and (b) |               |                        |               |
|--|--------------------------------------------------|---------------|------------------------|---------------|
|  | Scenario (a) (95% CIs)                           |               | Scenario (b) (95% CIs) |               |
|  | Energy intake                                    | Energy intake | Energy intake          | Energy intake |

|                      | changes                | stays the same         | changes                   | stays the same         |
|----------------------|------------------------|------------------------|---------------------------|------------------------|
| Total                | 7,768 (7,151 to 8,392) | 1,207 (1,003 to 1,431) | -2,685 (-3,402 to -1,966) | 2,536 (2,195 to 2,896) |
| Total under 75 years | 2,448 (2,254 to 2,638) | 463 (386 to 542)       | -477 (-719 to -233)       | 1,082 (945 to 1,223)   |
| Fruit and vegetables | -75 (-124 to -26)      | 696 (540 to 857)       | 1,996 (1,570 to 2,420)    | 1,414 (1,118 to 1,712) |
| Fibre                | -118 (-50 to -185)     | 188 (79 to 298)        | 439 (185 to 695)          | 204 (83 to 326)        |
| Fats                 | 410 (324 to 512)       | 373 (292 to 464)       | 577 (432 to 735)          | 601 (454 to 765)       |
| Salt                 | 426 (356 to 496)       | 98 (81 to 114)         | -32 (-37 to -26)          | 216 (181 to 252)       |
| Energy balance       | 7,124 (6,511 to 7,737) | 0*                     | -5,726 (-6,212 to -5,229) | 0*                     |
| Alcohol consumption  | 15 (11 to 19)          | -148 (-187 to -107)    | -13 (-16 to -9)           | 108 (79 to 137)        |

CI, credible interval.

<sup>a</sup>Numbers for each dietary component do not add up to the overall total of deaths delayed or averted because the DIETRON model accounts for double counting of different nutritional components contributing to the same cause of mortality <sup>41</sup>. Positive numbers indicate deaths delayed or averted.

\*Where there is no change in nutrient consumption there is no parameter to vary for the uncertainty analysis for health outcomes and therefore there are no CIs calculated for these dietary components

**Table 5. Total deaths delayed or averted by cause following taxation scenarios (a) and (b) allowing for energy intake to change.**

|                        | Deaths averted or delayed <sup>a</sup> |                           |
|------------------------|----------------------------------------|---------------------------|
|                        | Scenario (a) (95% CIs)                 | Scenario (b) (95% CIs)    |
| Cardiovascular disease | 5,845 (5,274 to 6,410)                 | -1,937 (-2,583 to -1,293) |
| Diabetes               | 477 (381 to 580)                       | -399 (-486 to -313)       |
| Cancer                 | 969 (798 to 1,138)                     | 30 (-240 to 305)          |
| Kidney disease         | 79 (39 to 123)                         | -63 (-100 to -32)         |
| Liver disease          | 392 (264 to 524)                       | -323 (-434 to -217)       |

CI, credible intervals

<sup>a</sup>Positive numbers indicate deaths delayed or averted.

In scenario (a), 75% of deaths averted were due to a reduction in cardiovascular disease, and 12% to cancer; in scenario (b), 72% of the increase in premature deaths was due to an increase in cardiovascular disease (table 5).

Table 6 shows that scenario (a) resulted in a reduction in GHG emissions of 18,683 ktCO<sub>2</sub>e (95% credible intervals, 14,665 ktCO<sub>2</sub>e to 22,889 ktCO<sub>2</sub>e). The predicted revenue generated from this scenario was £2,023 million (£1,980 million to £2,064 million). Scenario (b) resulted in a 15,228 ktCO<sub>2</sub>e (11,245 ktCO<sub>2</sub>e to 19,492 ktCO<sub>2</sub>e) reduction in GHG emissions. The reduction in emissions attributable to land-use change in scenario (a) accounted for 76% of the total reduction, and for 84% in scenario (b).

**Table 6. Reduction in greenhouse gas emissions and revenue generated from tax scenarios (a) and (b).**

|                                              | Scenario (a) (95% CIs)                            | Scenario (b) (95% CIs)                        |
|----------------------------------------------|---------------------------------------------------|-----------------------------------------------|
| Reduction in total emissions                 | 18,683 ktCO <sub>2</sub> e (14,665 to 22,889)     | 15,228 ktCO <sub>2</sub> e (11,245 to 19,492) |
| Reduction in emissions from land-used change | 14,138 ktCO <sub>2</sub> e (11,042 to 17,377)     | 12,837 ktCO <sub>2</sub> e (9,744 to 16,090)  |
| Revenue generated                            | £2,023 million (£1,980 million to £2,064 million) | N/A                                           |

CI, credible intervals; ktCO<sub>2</sub>e, kilotonne of carbon dioxide equivalents

## DISCUSSION

Our results show that fiscal interventions to reduce GHG emissions from the food sector may have health co-benefits. In scenario (a), taxation at a rate of £2.72/tCO<sub>2</sub>e/100g product has the potential to reduce the burden of premature deaths in the UK by 7,768 per year (1.4% of all UK deaths)<sup>45</sup> at the same time as reducing food related GHG emissions by 18,683 ktCO<sub>2</sub>e and generating up to £2.02 billion revenue. When subsidising products with GHG emissions lower than the average emissions per kg of food consumed in the UK (scenario (b)), we predict a reduction in emissions of 15,228 ktCO<sub>2</sub>e with an increase in premature mortality of 2,685 (0.5% of UK deaths)<sup>45</sup>.

Scenario (b) (revenue neutral) demonstrates how health and sustainability goals are not always aligned and results in some proposed price changes that run against the current trend in public health (e.g. subsidising sugar and soft drinks by 11p per kg due to the low level of GHG emissions associated with sugar). The relationship between food consumption and health is more politically prominent than that between food consumption and the environment, and therefore it is unlikely that a taxation system could be introduced that did not take account of effects on health and address them.

A concern regarding diets that would lead to reduced GHG emissions is that they may result in a decrease in consumption of essential micronutrients. Both modelled scenarios maintain the same broad micronutrient composition as the baseline diet with only moderate reductions in mean vitamin A and vitamin B12 consumption seen in scenario (a) (but these were still within recommended daily levels). Despite small absolute percentage changes in micronutrient consumption, at a population level there may be significant changes to the

number of people consuming below the recommended daily intakes (supplementary table S1).

**Strengths and limitations**

This study is the first to model the impact on population mortality of internalising the societal cost of food-related GHG emissions through increasing price. A strength of this work is that we are able to estimate the effect of price changes on both the taxed product, and on substituting and complementing products. Furthermore both consumption and price elasticity data are derived from the same dataset (LCF), resulting in more accurate modelling of the changes in purchasing and consumption than previous modelling studies in this area.<sup>20,22</sup>

Limitations of this work include that the estimates of GHG emissions of some products are assumed to be identical to related products (for example all tree fruits except oranges are assumed to be the same as apples), and non-UK data are used in some circumstances (for example with fish).<sup>38</sup> Estimates of GHG emissions for some imported products are not known and are assumed to be the same as imported products from elsewhere in the world. GHG emissions from land-use change are likely to vary significantly between and within countries and these variations are not captured by this research. Furthermore, the uncertainties surrounding the estimations of GHG emissions are not modelled; these will vary between different food products and between different producers with some (such as milk and beef)<sup>46</sup> having greater uncertainty than others.<sup>38</sup> The LCF has a significant non-response rate (50% response rate in Great Britain, and 59% in Northern Ireland) and although the results are weighted for non-response, the results may not be representative of the UK population with certain age and income groups likely to be under-sampled.<sup>47</sup>

In this study, we base estimates of pre- and post-tax diets on the mean population diet. Population diet will vary between individuals and they may respond to price changes differently both in terms of purchasing and food waste depending on their age and baseline consumption patterns. We do not account for these in our uncertainty estimates because the LCF reports at the household rather than individual level making it not possible to derive age or consumption specific price elasticities; our uncertainty estimates are therefore conservative. We are likely to have over-estimated the population consuming below recommended daily intakes because we chose to use adult recommendations but the mean and distributions of consumption are estimated for all ages. Furthermore, it was necessary to compromise between the number of food groups for which own- and cross-price elasticities are estimated, and the confidence with which those estimates were made; greater numbers of food groups results in less confidence in the estimates. We disaggregated the diet into 29 different groups and it is likely that within groups (for example, vegetable fats) certain constituents will vary (sunflower oil, rapeseed oil, etc.) but we assumed that the percentage change in consumption for any group applied to all foods within that group.

The uncertainty analyses from which the credible intervals are derived only estimate the parametric uncertainty attached to these estimates (for example the relationship between calorie intake and obesity), and cannot estimate the structural uncertainty (i.e. the uncertainty underlying the design of the model). Structural limitations include: the model assumes no time lag between changes in consumption behaviour and health outcomes; the model is cross-sectional and therefore cannot predict changes in life expectancy in the counterfactual scenario; it assumes that all non-food items will remain at the same price in the counterfactual scenario; and it assumes that reduction in consumption of broad food categories will be met equally by all items within that category.

We assume that all food purchased is consumed; food waste is no longer accounted for in the LCF and it is possible that the change in purchasing resulting from price increases could have a smaller impact on consumption patterns through individuals reducing food waste. Therefore individuals may maintain calorie consumption with reduced food purchasing following higher prices, this is thought to be partly driving the reduction in UK food and drink wastage between 2009 and 2011, a period of rising food prices and falling disposable incomes.<sup>48</sup> There would likely be differential changes in food waste patterns with different price changes making modelling of these circumstances difficult.

In our study we assume that calorie consumption will change following the implementation of a tax. Both scenarios modelled in this paper show small changes in calorie intake (1.4% decrease in scenario (a) and 1.0% increase in scenario (b), table 3). Although the changes in calorie intake dominate the modelled changes in mortality (table 4), the changes are considerably fewer than calorie reductions modelled in previous studies of taxes on GHGs or soft drinks (where calories are not assumed to be replaced), which suggest that they are plausible.<sup>23,49,50</sup> Extra calories consumed in scenario (b) are primarily due to increases in consumption of bread and cereals, and milk and soft drinks.

In both scenarios (a) and (b), there is a reduction in premature deaths if energy intake remains the same indicating that the post-tax diet is healthier in other respects (table 4). Although this estimate assumes that the percentage change in calories required to keep energy intake the same leads to a diet with equivalent percentage changes to individual nutritional components. Finally, the health impact following the implementation of tax scenarios (a) and (b) is only quantified through the change in diet. We are likely to have underestimated the wider benefits

to health of reduced GHG emissions from reduced environmental pollution and slowed climate change both within the UK and around the world.

### Comparisons with other studies

The 2006 Stern Review assessed the implications of climate change on the global economy and described climate change as ‘the greatest and widest-ranging market failure ever seen’.<sup>35</sup> The review went on to calculate the social cost of carbon to society as \$25-\$30/tCO<sub>2</sub>e emitted (£16-19/tCO<sub>2</sub>e, 2000 prices; £21-£25/tCO<sub>2</sub>e, 2010 prices).<sup>35</sup> Our tax rates are not dissimilar to the social costs to society calculated by the Stern Review, and allow for direct comparison between our modelled reduction in GHG emissions to the Defra abatement statistics derived for the agriculture MACC.<sup>34</sup> We estimate that GHG emissions from production and land-use change for UK food consumption amount to 249,207 ktCO<sub>2</sub>e; the reduction in GHG emissions seen in scenario (a) of 18,683 ktCO<sub>2</sub>e equates to 7.5% of these emissions. This is substantially more than the 7,850 ktCO<sub>2</sub>e reduction in GHG emissions estimated by Defra’s agriculture MACC with an equivalent investment of £24.10/tCO<sub>2</sub>e (£27.19/tCO<sub>2</sub>e, 2010 prices).<sup>34</sup> However, unlike the agriculture MACC, our model incorporates emissions from UK consumed food that is produced overseas. Imported products account for the vast majority of emissions relating to land-use change. Without land-use change, the reduction in emissions from scenarios (a) and (b) are both less than that estimated by Moran et al. (2008) at 4,545 ktCO<sub>2</sub>e and 2,441 ktCO<sub>2</sub>e respectively.

Scenario (b) results in a reduction in GHG emissions of 15,228 ktCO<sub>2</sub>e which is less than the reduction in scenario (a). It may be expected that by subsidising foods with below-average GHG emissions there would be an even greater reduction in emissions than found in scenario (a); however, the effect of substituting to other foods, in particular to milk, means that the

reduction in GHG emissions is not as marked. It should be noted that although scenario (b) results in an overall increase in calorie intake of 1.0% (because of increased food consumption) and scenario (a) results in a decrease of 1.4%, this makes little difference to the overall GHG emissions; if calorie consumption were to stay the same as baseline in both scenarios, there would still be an 18,428 ktCO<sub>2</sub>e reduction in scenario (a) compared to 15,436 ktCO<sub>2</sub>e reduction in scenario (b).

The number of deaths delayed or averted are fewer than those predicted by Scarborough et al. who modelled the health impact of three sustainable dietary scenarios,<sup>27</sup> and by Friel et al. who modelled the health benefits of various strategies to reduce agricultural GHG emissions.<sup>25</sup> However, neither study quantified realistic counterfactual dietary scenarios. Friel et al. modelled the effect on ischemic heart disease of a 30% reduction in livestock consumption leading to less saturated fat and cholesterol intake, without accounting for any effect of substituting food products,<sup>25</sup> and Scarborough et al., following the UK Committee on Climate Change Fourth Carbon Budget dietary scenarios, assumed that replacement calories from a 50% reduction in livestock consumption were exclusively derived from fruit, vegetables, and cereals.<sup>27</sup>

Edjabou and Smed investigated the impact of a GHG tax on food in Denmark and identify identical patterns of reductions in GHG emissions and subsequent changes to population food consumption as in our study.<sup>23</sup> Edjabou and Smed find that applying a non-tax neutral scenario results in a greater reduction in emissions than a tax neutral scenario, and that the non-tax neutral scenario reduces overall calorie consumption compared to an increase in the tax neutral model. Similarly both our model and the Edjabou and Smed model identify large reductions in saturated fat consumption alongside small changes in sugar consumption with

the non-neutral scenario, and the opposite following the tax neutral scenario. Edjabou and Smed's model does not include the effect of land-use change, and furthermore, their non-tax neutral scenario models the effect of increasing the price of all food rather than just food groups with above the average emissions. However, their estimate of the reduction in GHG emissions from food consumed in Denmark of between 4.0% and 7.9% using a tax rate of £19.10/tCO<sub>2</sub>e is comparable to the 7.5% reduction we observe in the equivalent scenario (a) with a tax rate of £27.20/tCO<sub>2</sub>e applied just to food groups with emissions greater than average.<sup>23</sup>

### Implications and future research

Scenario (a) is predicted to generate £2.02 billion revenue per annum. This represents a substantial amount of money that could be reinvested in GHG emission mitigation strategies in either the agriculture sector or elsewhere. However, revenue may also be spent on GHG producing projects that would otherwise have not been funded, thereby negating the reductions in GHG emissions seen with the changes in diet modelled here. Although our modelled tax scenarios lead to a healthier diet, scenario (a) would likely be economically regressive meaning that the poor spend proportionately more of their income on the tax than the rich. However, because those in lower socio-economic classes suffer from a greater prevalence of chronic disease<sup>51</sup> and are more sensitive to price changes,<sup>52</sup> the taxes are likely to be progressive in terms of health benefits. Further work should explicitly consider differential effects by socio-demographic group of internalising the societal cost of climate change in the food sector; this is not currently possible with our data. Alongside this work, there should be greater exploration of the effects of different tax rates and models to explore whether the synergies and conflicts identified in this research may be negated or reversed. Our research also estimates a 14% reduction in lamb and beef consumption, which will have

significant negative economic implications for some farmers. We have not accounted for these wider economic impacts; appropriate reinvestment of the tax revenue may help to mitigate the negative consequences.

We are using taxation to internalise much of the cost to society of GHG emissions as it is a readily grasped mechanism for changing prices; however, these price changes could be realised through a different mechanism, e.g. carbon trading schemes that incorporate all GHGs relevant to agriculture. The taxes modelled here are not unrealistic; the highest rate of tax is £0.176/100g beef, which represents a price increase of approximately 15%-35% (depending on quality and type of beef purchased). This price increase is not dissimilar to Mytton et al.'s estimate of a 20% increase in the price of 'unhealthy' foods to give a significant population health benefit,<sup>18</sup> and is significantly less than the current tax on cigarettes of 16.5% of retail plus a further £3.35 per 20 cigarettes.<sup>53</sup> As discussed by Mytton et al., taxation of unhealthy food as a public health measure is beginning to gain traction in the developed world<sup>18</sup> yet the jump to taxing foods with high GHG emissions is unlikely to happen soon. Scenario (b) indicates that health and sustainability goals may not always be aligned and therefore an appropriate next step would be to investigate the health and environmental impacts of a combined GHG emission and unhealthy food tax (for example implementing tax scenario (a) alongside a tax on soft drinks).

**Conclusions**

In the context of widespread global economic austerity and the estimated long term financial costs of carbon,<sup>35,54</sup> the health, economic, and environmental benefits make internalising these costs through a GHG emission tax on food a potential solution. Current projections estimate that the UK is unlikely to meet the 2050 target of an 80% reduction in GHG

emissions set by the Climate Change Act<sup>7,8</sup> and large changes to the food chain supply system would be required to achieve just a 70% reduction in emissions from agriculture (not including land-use change).<sup>38</sup> The careful use of market governance mechanisms will have a crucial role in reducing global agriculture GHG emissions and our results show that taxation offers a possible method to reduce GHG emissions, improve public health, and raise revenue simultaneously.

### **Funding**

None

### **Contributorship**

PS had the original idea for the study. AB coordinated the study, designed the study methodology and ran the modelling except for the calculation and application of price elasticities. RT designed the economic modelling for devising price elasticities. AK devised how to apply the tax strategy to price elasticities and ran the economic modelling. PS designed the model to determine health outcomes. AB wrote the initial draft of the manuscript. PS, AK, RT, TG, and MR all commented on and contributed to the study methodology and edited various drafts of the final manuscript.

### **Data sharing**

Price elasticity data are available from the authors on request. The values for all of the parameters in the DIETRON model, and the sources from which they are drawn, are provided in the supplementary data of an open access journal article and the complete model is available from the authors on request.

### **Competing Interests**

None

REFERENCES

1 Costello A, Abbas M, Allen A, *et al.* Managing the health effects of climate change: Lancet and University College London Institute for Global Health Commission. *The Lancet* 2009;**373**:1693–733.

2 Solomon S, Qin M, Manning M, *et al.* Section 2.10.2, Direct Global Warming Potentials, in Contribution of Working Group I to the Fourth Assessment Report of the Intergovernmental Panel on Climate Change. London: 2007. [http://www.ipcc.ch/publications\\_and\\_data/ar4/wg1/en/ch2s2-10-2.html](http://www.ipcc.ch/publications_and_data/ar4/wg1/en/ch2s2-10-2.html)

3 Bellarby J, Foereid B, Hastings A, *et al.* Cool farming: climate impacts of agriculture and mitigation potential. Amsterdam: 2008.

4 United Nations Environment Programme. Avoiding Future Famines: Strengthening the Ecological Foundation of Food Security through Sustainable Food Systems. Nairobi: 2012.

5 World Health Organisation. Protecting health from climate change. Geneva: 2009.

6 Brown K, Cardenas L, MacCarthy J, *et al.* UK Greenhouse Gas Inventory, 1990 to 2010. Annual report for submission under the Framework Convention on Climate Change. Didcot: 2012.

7 UK Government. Climate Change Act 2008. London: 2008. <http://www.legislation.gov.uk/ukpga/2008/27/contents>

8 Cambridge Econometrics. The decline in UK's carbon emissions is set to accelerate after 2020 as power generation, helped by a rising flood price of carbon on fossil fuel inputs, makes good progress towards decarbonisation. Cambridge: 2011. <http://www.camecon.com/uk/ukenergy/pressrelease-UKenergy.aspx>

9 Foresight. The future of food and farming. Final project report. London: 2011.

10 Foley JA, Ramankutty N, Brauman KA, *et al.* Solutions for a cultivated planet. *Nature* 2011;**478**:337–42.

11 World Health Organisation. Diet, Nutrition and the Prevention of Chronic Diseases. Technical Report Series 916. Geneva: 2003.

12 Micha R, Wallace S, Mozaffarian D. Red and processed meat consumption and risk of incident coronary heart disease, stroke and diabetes mellitus. A systematic review and meta-analysis. *Circulation* 2010;**121**:2271–83.

13 Pan A, Sun Q, Bernstein AM, *et al.* Red meat consumption and mortality: results from 2 prospective cohort studies. *Archives of Internal Medicine* 2012;**172**:555–63.

14 Chan DS, Lau R, Aune D, *et al.* Red and processed meat and colorectal cancer incidence: meta-analysis of prospective studies. *PLoS One* 2011;**6**:e20456.

- 15 Aune D, Chan DSM, Lau R, *et al.* Dietary fibre, whole grains, and risk of colorectal cancer: systematic review and dose-response meta-analysis of prospective studies. *The British Medical Journal* 2011;**343**:d6617.
- 16 Dauchet L, Amouyel P, Dallongeville J. Fruit and vegetable consumption and risk of stroke: a meta-analysis of cohort studies. *Neurology* 2005;**65**:1193–7.
- 17 Dauchet L, Amouyel P, Hercberg S, *et al.* Fruit and vegetable consumption and risk of coronary heart disease: a meta-analysis of cohort studies. *Journal of Nutrition* 2006;**136**:2588–93.
- 18 Mytton O, Clarke D, Rayner M. Taxing unhealthy food and drinks to improve health. *The British Medical Journal* 2012;**344**:e2931.
- 19 Thow AM, Jan S, Leeder S, *et al.* The effect of fiscal policy on diet, obesity and chronic disease: a systematic review. *Bulletin of the World Health Organisation* 2010;**88**:609–14.
- 20 Nnoaham KE, Sacks G, Rayner M, *et al.* Modelling income group differences in the health and economic impacts of targeted food taxes and subsidies. *International Journal of Epidemiology* 2009;**38**:1324–33.
- 21 Feng K, Hubacek K, Guan D, *et al.* Distributional effects of climate change taxation: the case of the UK. *Environmental Science and Technology* 2010;**44**:3670–6.
- 22 Wirsenius S, Hedenus F, Mohlin K. Greenhouse gas taxes on animal food products: Rationale, tax scheme and climate mitigation effects. *Climatic Change* 2011;**108**:159–84.
- 23 Edjabou L, Smed S. The effect of using consumption taxes on foods to promote climate friendly diets – The case of Denmark. *Food Policy* 2013;**39**:84–96.
- 24 McMichael AJ, Powles JW, Butler CD, *et al.* Food, livestock production, energy, climate change, and health. *The Lancet* 2007;**370**:1253–63.
- 25 Friel S, Dangour AD, Garnett T, *et al.* Public health benefits of strategies to reduce greenhouse-gas emissions: food and agriculture. *The Lancet* 2009;**374**:2016–25.
- 26 Garnett T. Cooking up a storm. Food, greenhouse gas emissions and our changing climate. Guildford: 2008.
- 27 Scarborough P, Allender S, Clarke D, *et al.* Modelling the health impact of environmentally sustainable dietary scenarios in the UK. *European Journal of Clinical Nutrition* 2012;**66**:710–5.
- 28 Vieux F, Soler L, Touazi D, *et al.* High nutritional quality is not associated with low greenhouse gas emissions in self-selected diets of French adults. *American Journal of Clinical Nutrition* 2013;**97**:569–83.

29 Saxe H, Larsen TM, Mogensen L. The global warming potential of two healthy Nordic diets compared with the average Danish diet. *Climatic Change* 2013;**116**:249–62.

30 Macdiarmid J, Kyle J, Horgan G, *et al.* Livewell: a balance of healthy and sustainable food choices. London: 2011.

31 Macdiarmid J, Kyle J, Horgan G, *et al.* Sustainable diets for the future: can we contribute to reducing greenhouse gas emissions by eating a healthy diet? *American Journal of Clinical Nutrition* 2012;**96**:632–9.

32 Aston LM, Smith JN, Powles JW. Impact of a reduced red and processed meat dietary pattern on disease risks and greenhouse gas emissions in the UK: a modelling study . *BMJ Open* 2012;**2** . doi:10.1136/bmjopen-2012-001072

33 Wilson N, Nghiem N, Ni Mhurchu C, *et al.* Foods and Dietary Patterns That Are Healthy, Low-Cost, and Environmentally Sustainable: A Case Study of Optimization Modeling for New Zealand. *PLoS ONE* 2013;**8**:e59648.

34 Moran D, MacLeod M, Wall E, *et al.* UK Marginal Abatement Cost Curves for the Agriculture and Land Use, Land-Use Change and Forestry Sectors out to 2022, with Qualitative Analysis of Options to 2050. Report to the Committee on Climate Change. London: 2008.

35 Stern N. Stern Review: The Economics of Climate Change. London: 2006.

36 Ackerman F, Stanton EA. Climate Risks and Carbon Prices: Revising the Social Cost of Carbon. *Economics: The Open-Access, Open Assessment E-Journal* 2012;**6**:2012–10.

37 Department for the Environment Food and Rural Affairs. Family Food 2010. London: 2011.

38 Audsley E, Brander M, Chatterton J, *et al.* How low can we go? An assessment of greenhouse gas emissions from the UK food system and the scope to reduce them by 2050. *Food Climate Research Network – WWF-UK* 2009.

39 FAOSTAT. The Statistics Division of the Food and Agriculture Organisation of the United Nations. 2012.<http://faostat.fao.org/> (accessed 7 Jun2013).

40 Tiffin R, Arnoult M. The demand for a healthy diet: estimating the almost ideal demand system with infrequency of purchase. *European Review of Agricultural Economics* 2010;**37**:501–21.

41 Scarborough P, Nnoaham K, Clarke D, *et al.* Modelling the impact of a healthy diet on cardiovascular disease and cancer mortality. *Journal of Epidemiology and Community Health* 2012;**66**:420–6.

42 Scarborough P, Morgan R, Webster P, *et al.* Differences in coronary heart disease, stroke and cancer mortality rates between England, Wales, Scotland and Northern Ireland: the role of diet and nutrition. *BMJ Open* 2011;**1**:e000263.

- 43 Department of Health. National Diet and Nutrition Survey Years 1 and 2, 2008/9 - 2009/10. 2011.
- 44 Department of Health. NHS Choices. Healthy eating. 2012.<http://www.nhs.uk/livewell/healthy-eating/Pages/Healthyeating.aspx> (accessed 6 Jun2013).
- 45 Office for National Statistics. Death registrations by single year of age, United Kingdom 2010. 2011.
- 46 Williams A, Audsley E, Sandars D. Determining the environmental burdens and resource use in the production of agricultural and horticultural commodities. Defra project report IS0205. Bedford: 2006.
- 47 Department for the Environment Food and Rural Affairs. Survey sampling for Family Food. London: 2011. <http://www.defra.gov.uk/statistics/files/defra-stats-foodfarm-food-methodology-sampling-111213.pdf>
- 48 Quested T, Parry A. New estimates for household food and drink waste in the UK. Banbury: 2011.
- 49 Andreyeva T, Chaloupka FJ, Brownell KD. Estimating the potential of taxes on sugar-sweetened beverages to reduce consumption and generate revenue. *Preventative Medicine* 2011;**52**:413–6.
- 50 Lin BH, Smith TA, Lee JY, *et al*. Measuring weight outcomes for obesity intervention strategies: the case of a sugar-sweetened beverage tax. *Economics and Human Biology* 2011;**9**:329–41.
- 51 Commission on the Social Determinants of Health. Closing the gap in a generation. Geneva: 2008.
- 52 Smed S, Jensen JD, Denver S. Socioeconomic characteristics and the effect of taxation as a health policy instrument. *Food Policy* 2007;**32**:624–39.
- 53 Her Majesty's Revenue and Customs. Tobacco products duty. 2012.<http://www.hmrc.gov.uk/rates/tobacco-duty.htm> (accessed 7 Jun2013).
- 54 Price R, Thornton S, Nelson S. The Social Cost Of Carbon and the Shadow Price Of Carbon: what they are, and how to use them in economic appraisal in the UK. London: 2007.

1  
2  
3  
4  
5  
6  
7  
8  
9  
10  
11  
12  
13  
14  
15  
16  
17  
18  
19  
20  
21  
22  
23  
24  
25  
26  
27  
28  
29  
30  
31  
32  
33  
34  
35  
36  
37  
38  
39  
40  
41  
42  
43  
44  
45  
46  
47  
48  
49  
50  
51  
52  
53  
54  
55  
56  
57  
58  
59  
60

For peer review only

## FIGURE LEGENDS

### Figure 1. Modelling pathway

The figure highlights the major steps in the modelling pathway used in this research.

tCO<sub>2</sub>e, tonnes of CO<sub>2</sub> equivalents

### Figure 2. DIETRON model conceptual framework

The figure demonstrates relationships between different components of the DIETRON comparative risk assessment model. Model inputs are to the left of the figure with outcomes on the right and mediating factors in the middle. Solid lines represent a negative health relationship and dashed lines represent a positive relationship.

1  
2  
3  
4  
5  
6  
7  
8  
9  
10  
11  
12  
13  
14  
15  
16  
17  
18  
19  
20  
21  
22  
23  
24  
25  
26  
27  
28  
29  
30  
31  
32  
33  
34  
35  
36  
37  
38  
39  
40  
41  
42  
43  
44  
45  
46  
47  
48  
49  
50  
51  
52  
53  
54  
55  
56  
57  
58  
59  
60

**TITLE**

Assessing the Impact on Chronic Disease of Incorporating the Societal Cost of Greenhouse Gases into the Price of Food: an Econometric and Comparative Risk Assessment Modelling Study

**AUTHORS**

Adam DM Briggs<sup>a</sup>, Ariane Kehlacher<sup>b</sup>, Richard Tiffin<sup>b</sup>, Tara Garnett<sup>c</sup>, Mike Rayner<sup>a</sup>, Peter Scarborough<sup>a</sup>

**AFFILIATIONS**

a British Heart Foundation Health Promotion Research Group, Nuffield Department of Population Health, University of Oxford, Oxford, UK

b School of Agriculture, Policy and Development, University of Reading, Reading, UK

c Food Climate Research Network, University of Oxford, Oxford, UK

**CORRESPONDENCE TO:**

Adam Briggs, British Heart Foundation Health Promotion Research Group, Nuffield Department of Population Health, University of Oxford, Oxford. UK. OX3 7LF.

Email: [adam.briggs@dph.ox.ac.uk](mailto:adam.briggs@dph.ox.ac.uk)

Phone: +44 1865 289200

**KEYWORDS**

Nutrition, taxation, greenhouse gas emissions, chronic disease

**WORD COUNT**

~~4991~~5148

## ABSTRACT

### Objectives

To model the impact on chronic disease of a tax on UK food and drink that internalises the wider costs to society of greenhouse gas emissions, and to estimate the potential revenue.

### Design

An econometric and comparative risk assessment modelling study

### Setting

UK

### Participants

UK adult population

### Interventions

Two tax scenarios are modelled:

- (a) a tax of £2.72/tonne carbon dioxide equivalents (tCO<sub>2</sub>e)/100g product applied to all food and drink groups with above average greenhouse gas emissions.
- (b) as with scenario (a) but food groups with emissions below average are subsidised to create a tax neutral scenario.

### Outcome measures

Primary outcomes are change in UK population mortality from chronic diseases following the implementation of each taxation strategy, the change in UK greenhouse gas emissions, and the predicted revenue.

Secondary outcomes are the changes to the micronutrient composition of the UK diet.

**Results**

Scenario (a) results in ~~7,770~~~~6,750~~ (95% credible intervals: ~~6,150~~~~7,150~~ to ~~8,390~~~~7,350~~) deaths averted and a reduction in GHG emissions of 18,800-683 (14,700-665 to ~~23,000~~~~22,889~~) ktCO<sub>2</sub>e per year. Estimated annual revenue is £2.0~~23~~ (£1.98 to £2.0~~67~~) billion.

Scenario (b) results in ~~3,720~~~~2,685~~ (~~2,980~~~~1,966~~ to ~~4,460~~~~3,402~~) extra deaths and a reduction in GHG emissions of ~~16,100~~~~15,228~~ (~~12,000~~~~11,245~~ to ~~20,400~~~~19,492~~) ktCO<sub>2</sub>e per year.

**Conclusions**

Incorporating the societal cost of greenhouse gases into the price of foods could save ~~nearly~~ ~~7,000~~~~7,770~~ lives in the UK each year, reduce food-related GHG emissions, and generate substantial tax revenue. The revenue neutral scenario (b) demonstrates that sustainability and health goals are not always aligned. Future work should focus on investigating the health impact by population subgroup and on designing fiscal strategies to promote both sustainable and healthy diets.

## ARTICLE SUMMARY

### Article focus

- Climate change has been described as ‘the biggest global health threat of the 21<sup>st</sup> century’ and agriculture contributes up to 32% of global greenhouse gas emissions.
- Taxation based on greenhouse gas (GHG) emissions is a potential mechanism for internalising the wider costs of climate change to society.
- This study models the impact of taxing food and drink based on their greenhouse gas emissions to estimate the effect on health of diets low in greenhouse gas emissions.

### Key messages

- Incorporating the societal cost of greenhouse gases into the price of foods could significantly improve population health at the same time as reducing food-related GHG emissions, and generating substantial tax revenue.
- However, health and sustainability goals are not always aligned and there is the potential to worsen population health when subsidising food and drink products low in greenhouse gas emissions.

### Strengths and limitations of the study

- This study uses the best currently available datasets to estimate the effects of a taxation strategy on both the taxed product, as well as on substituting and complementing products.
- The data on UK greenhouse gas emissions for different food groups are not complete meaning that for some foods, levels of emissions were estimated from related food groups or constituent ingredients.
- Due to limitations of the economic data, this study is not able to estimate the health impact by different subgroups of society, such as socioeconomic group.

1  
2  
3  
4  
5  
6  
7  
8  
9  
10  
11  
12  
13  
14  
15  
16  
17  
18  
19  
20  
21  
22  
23  
24  
25  
26  
27  
28  
29  
30  
31  
32  
33  
34  
35  
36  
37  
38  
39  
40  
41  
42  
43  
44  
45  
46  
47  
48  
49  
50  
51  
52  
53  
54  
55  
56  
57  
58  
59  
60

**FUNDING STATEMENT**

This research received no specific grant from any funding agency in the public, commercial or not-for-profit sectors.

**COMPETING INTERESTS**

None declared

**AUTHORS' CONTRIBUTIONS**

PS had the original idea for the study. AB coordinated the study, designed the study methodology and ran the modelling except for the calculation and application of price elasticities. RT designed the economic modelling for devising price elasticities. AK devised how to apply the tax strategy to price elasticities and ran the economic modelling. PS designed the model to determine health outcomes. AB wrote the initial draft of the manuscript. PS, AK, RT, TG, and MR all commented on and contributed to the study methodology and edited various drafts of the final manuscript.

**DATA SHARING STATEMENT**

Price elasticity data are available from the authors on request. The values for all of the parameters in the DIETRON model, and the sources from which they are drawn, are provided in the supplementary data of an open access journal article and the complete model is available from the authors on request.

## INTRODUCTION

Climate change has been described as ‘the biggest global health threat of the 21<sup>st</sup> century’ with rising global temperatures projected to alter disease patterns, increase food and water insecurity, and lead to extreme climatic events.<sup>1</sup> Globally, agriculture is thought to directly contribute to between 10 and 12% of total greenhouse gas (GHG) emissions, and up to 32% of global emissions if land-use change is included.<sup>2,3</sup> The need for sustainable food systems to address climate change has been highlighted by both the United Nations (UN) and the World Health Organization (WHO).<sup>4,5</sup>

In the UK, the 2010 annual GHG inventory report submitted to the United Nations Framework Convention on Climate Change estimates that 46.2 million tonnes of carbon dioxide equivalents (tCO<sub>2</sub>e), approximately 8% of GHG emissions produced in the UK, are related to agriculture.<sup>6</sup> The Climate Change Act was passed by the UK government in 2008 to reduce the UK’s GHG emissions by 80% by 2050 from 1990 levels,<sup>7</sup> although projections indicate that the interim target of a 50% reduction by 2027 is unlikely to be achieved.<sup>8</sup> Recent reviews have suggested that substantial reductions in GHG emissions from agriculture are unlikely through technological improvements alone, and will require changes in food consumption patterns.<sup>9,10</sup>

### Food, tax, and health

In the developed world, obesity is a major health problem and is associated with diseases such as diabetes, cardiovascular disease, and some cancers.<sup>11</sup> Furthermore, high intake of specific food groups, such as red and processed meat are also associated with ill-health.<sup>12–14</sup> Conversely, high intake of other food groups, such as fruit and vegetables, protect against ill-health.<sup>15–17</sup>

1  
2  
3  
4  
5  
6  
7  
8  
9  
10  
11  
12  
13  
14  
15  
16  
17  
18  
19  
20  
21  
22  
23  
24  
25  
26  
27  
28  
29  
30  
31  
32  
33  
34  
35  
36  
37  
38  
39  
40  
41  
42  
43  
44  
45  
46  
47  
48  
49  
50  
51  
52  
53  
54  
55  
56  
57  
58  
59  
60

Countries are increasingly using taxation to change population eating habits and improve health; examples include the recently withdrawn tax on saturated fat in Denmark, a tax on a variety of unhealthy foods in Hungary, and a tax on sweetened drinks in France.<sup>18</sup> The majority of studies investigating the relationship between food taxation and health are based on modelling, which offers the flexibility to illustrate a range of scenarios.<sup>19</sup> In modelling taxes, it is important to account for the effect of substituting with other foods as there is the potential that taxes designed to improve health may inadvertently do the opposite, for example by heavily taxing saturated fat, people may then consume more salt.<sup>20</sup> In summarising the current evidence from trials and modelling studies, a review by Mytton et al. suggests that any tax would need to be 20% or higher to have a significant impact on purchasing patterns and population health.<sup>18</sup>

A tax on foods associated with high GHG emissions could potentially help to internalise the wider cost of GHGs to society, however it is unclear whether such a tax would have beneficial or harmful side-effects on health.<sup>21–23</sup> Other studies have explored the potential health implications of diets that reduce GHG emissions;<sup>23–33</sup> however, many of these have modelled arbitrary changes in diet that may not reflect possible changes in consumption (e.g. replacing red meat with fruit and vegetables).<sup>24–27</sup> Other studies that have investigated more realistic dietary scenarios do not offer a mechanism to change population dietary habits.<sup>28–32</sup> Wilson et al. identified dietary patterns that were low cost, low in GHG emissions, and beneficial for health, and suggest that fiscal measures may be an appropriate mechanism by which to alter New Zealand dietary habits.<sup>33</sup> Edjabou and Smed are the only authors to have previously modelled the impact on health of internalising the cost of GHG emissions through taxation.<sup>23</sup> The authors investigated the impact of raising the price of food by either 756 DKK

(£86) or 260 DKK (£30) per tonne of carbon dioxide equivalents (tCO<sub>2</sub>e) on Danish population saturated fat and sugar consumption. However, the magnitude of any subsequent health effects is not quantified.<sup>23</sup>

In order to account for, and internalise, the wider costs to society of climate change from food production and consumption in the UK, we model the effect of a UK GHG emission food tax on health. Two scenarios are modelled: the first taxes food groups with GHG emissions greater than average, and the second taxes high GHG emission food groups and subsidises those with low emissions to create a revenue-neutral scenario. We show that internalising the costs of GHG emissions in the food system has the potential to reduce GHG emissions, generate significant revenue, and save lives.

1  
2  
3  
4  
5  
6  
7  
8  
9  
10  
11  
12  
13  
14  
15  
16  
17  
18  
19  
20  
21  
22  
23  
24  
25  
26  
27  
28  
29  
30  
31  
32  
33  
34  
35  
36  
37  
38  
39  
40  
41  
42  
43  
44  
45  
46  
47  
48  
49  
50  
51  
52  
53  
54  
55  
56  
57  
58  
59  
60

**METHODS**

We use a five-step method to model the impact of a GHG emission food tax on the health of the UK population (as measured by annual deaths averted or delayed, [see figure 1](#)).

**Step 1 – set the tax rates**

The modelled tax rates are based on the UK government’s Department for Environment, Food and Rural Affairs (Defra) agriculture marginal abatement cost curve (MACC) by Moran et al., adjusted to 2010 prices.<sup>34</sup> MACCs are used to prioritise the implementation of GHG abatement strategies. They plot the impact on GHG emissions of different interventions in the order of cost-effectiveness thereby allowing the user to visualise the cost (or savings) of reducing emissions by a specific amount using a given intervention. By plotting the cost-effectiveness of different strategies to reduce GHG emissions from agriculture, the agriculture MACC suggests that investment of £24.10/tCO<sub>2</sub>e (£27.19/tCO<sub>2</sub>e, 2010 prices) can reduce UK agricultural GHG emissions by 7,850 ktCO<sub>2</sub>e (16.2%), with the next most cost-effective abatement strategy costing significantly more (£174.22/tCO<sub>2</sub>e, £196.60/tCO<sub>2</sub>e, 2010 prices).<sup>34</sup> The specific tax level chosen for this analysis corresponds with the threshold identified in the MACC that allows for substantial reductions of GHG emissions at a cost of £24.10/tCO<sub>2</sub>e (£27.19/tCO<sub>2</sub>e, 2010 prices). The tax rate selected is also similar to the social cost of carbon for the UK economy of £21-£25/tCO<sub>2</sub>e (2010 prices) calculated by the Stern Review<sup>35</sup> although it should be noted that estimations of the cost to society of GHG emissions vary markedly.<sup>36</sup>

Two illustrative scenarios are modelled to investigate the impact on health, change in UK GHG emissions, and revenue generated from a GHG emission tax on food:

- (a) GHG emissions tax of £2.72/tCO<sub>2</sub>e/100g product applied to all food groups with emissions greater than 0.41 kgCO<sub>2</sub>e/100g, the mean level of emissions across all food groups;
- (b) as with (a) but using revenue generated to subsidise food groups with emissions lower than 0.41 kgCO<sub>2</sub>e/100g to create a cost-neutral scenario.

The rate of subsidy in scenario (b) was calculated by applying the tax rate of £2.72 tCO<sub>2</sub>e/100g product to the difference between the mean GHG emissions (0.41 kgCO<sub>2</sub>e/100g) and the GHG emissions for each food group with emissions below average.

### Step 2 – identify baseline consumption data

Current UK food consumption patterns are taken from the Living Costs and Food Survey (LCF) for 2010, to provide the baseline level of food purchasing prior to the application of a tax.<sup>37</sup> The LCF is a survey of purchasing data for 256 food categories compiled from two-week long food expenditure diaries of 12,196 people (5,263 households) from across the UK. The survey measures purchasing habits and we assumed that all food purchased is consumed.

### Step 3 – identify greenhouse gas emissions for each food group

GHG emissions for different food types, measured as kg of CO<sub>2</sub>e produced for a kg of product, are taken from Audsley et al., the only study to have collated a near complete set of UK specific GHG emissions for a wide range of food types from the literature.<sup>38</sup> Emissions are divided into three categories: primary production; processing, distribution, retail, and preparation; and land-use change.

1  
2  
3  
4  
5  
6  
7  
8  
9  
10  
11  
12  
13  
14  
15  
16  
17  
18  
19  
20  
21  
22  
23  
24  
25  
26  
27  
28  
29  
30  
31  
32  
33  
34  
35  
36  
37  
38  
39  
40  
41  
42  
43  
44  
45  
46  
47  
48  
49  
50  
51  
52  
53  
54  
55  
56  
57  
58  
59  
60

To derive the level of the tax for each food type, we use the GHG emissions from primary production (up to the retail distribution centre – pre-RDC) and land-use change, and not emissions from processing, distribution, retail, and preparation (post-RDC); although the exact distinction of where production stops and processing begins varies slightly between different food groups (see Audsley *et al.* 2009).<sup>38</sup> This is because post-RDC emissions for individual food types are not available.<sup>38</sup> Furthermore, post-RDC emissions result from the consumer’s travel to buy the food and how the consumer chooses to cook the product. These decisions are as much influenced by the price of fuel and electricity, as food. On a conservative basis, we assume that food purchased in restaurants (not including takeaway meals) will not change in price as a result of the tax (eating out in 2010 contributed only 11% of daily calorie intake).<sup>37</sup>

Pre-RDC emissions for food categories in the LCF are weighted by the proportion of food consumed in the UK that is domestically produced, imported from Europe, and imported from elsewhere in the world using consumption and import data from Food Balance Sheets published by the Statistics Division of the Food and Agriculture Organization of the United Nations.<sup>39</sup>

Where FAOSTAT food types do not exactly match the food categories used in the LCF, the food categories are either assigned emissions (and therefore a tax rate) of a weighted average of the food comprising that group (e.g. fresh fruit), the same emissions as the primary ingredient in the group (e.g. bread/cereals/flour are assigned the emissions of wheat), or the emissions of the closest constituent ingredient (e.g. cheese is assigned the same emissions as butter).

The GHG emissions for each food type in kgCO<sub>2</sub>e/kg product are the sum of pre-RDC emissions (weighted by the proportions domestically produced and imported) and land-use change related emissions.

#### Step 4 – apply price elasticities

Price elasticities predict the percentage change in the amount of a food purchased, and of its substitute and complementary foods, following a one per cent change in price. UK specific price elasticities are derived for food categories from the LCF, 2010 using methods described in Tiffin and Arnould.<sup>40</sup> Using three-stage budgeting, we estimate unconditional price elasticities for 29 different food groups into which each of the 256 food categories of the LCF are allocated. The own- and cross-price elasticities used in this study are available from the authors on request. These are then used to predict change in purchasing, and therefore nutritional composition of the diet and annual tax revenue generated following tax scenarios (a) and (b) (table 1). The annual revenue generated by tax scenario (a) is calculated by scaling up the post-tax per person food intake from the LCF to the UK population and multiplying it by the tax per kg of each food group.

1  
2  
3  
4  
5  
6  
7  
8  
9  
10  
11  
12  
13  
14  
15  
16  
17  
18  
19  
20  
21  
22  
23  
24  
25  
26  
27  
28  
29  
30  
31  
32  
33  
34  
35  
36  
37  
38  
39  
40  
41  
42  
43  
44  
45  
46  
47  
48  
49  
50  
51  
52  
53  
54  
55  
56  
57  
58  
59  
60

**Table 1. Food groups for which price-elasticities are estimated, and the levels of taxation applied to each food group for tax scenarios (a) and (b).**

| Food group                      | GHG emissions/<br>kg product (kgCO <sub>2</sub> e) | Tax/kg product in £ |              |
|---------------------------------|----------------------------------------------------|---------------------|--------------|
|                                 |                                                    | Scenario (a)        | Scenario (b) |
| Milk                            | 1.8                                                | 0                   | -0.06        |
| Other milk products             | 2.4                                                | 0                   | -0.05        |
| Cream                           | 2.4                                                | 0                   | -0.05        |
| Cheese                          | 1.8                                                | 0                   | -0.06        |
| Eggs                            | 4.9                                                | 0.02                | 0.02         |
| Pork                            | 7.9                                                | 0.10                | 0.10         |
| Beef                            | 68.8                                               | 1.76                | 1.76         |
| Poultry                         | 5.4                                                | 0.04                | 0.04         |
| Lamb                            | 64.2                                               | 1.63                | 1.63         |
| Other meat                      | 35.9                                               | 0.86                | 0.86         |
| Fish                            | 5.4                                                | 0.03                | 0.03         |
| Bread/cereals/flour             | 1.0                                                | 0                   | -0.08        |
| Cakes/buns/pastries/biscuits    | 0.9                                                | 0                   | -0.09        |
| Animal fats                     | 35.6                                               | 0.86                | 0.86         |
| Vegetable fats                  | 3.2                                                | 0                   | -0.02        |
| Sugar and preserves             | 0.1                                                | 0                   | -0.11        |
| Sweets                          | 0.1                                                | 0                   | -0.11        |
| Tinned and dried fruit and nuts | 0.9                                                | 0                   | -0.09        |
| Fresh fruit                     | 0.9                                                | 0                   | -0.09        |

|                       |      |      |       |
|-----------------------|------|------|-------|
| Potatoes              | 0.4  | 0    | -0.10 |
| Canned vegetables     | 1.6  | 0    | -0.07 |
| Fresh vegetables      | 1.6  | 0    | -0.07 |
| Fruit juice           | 0.9  | 0    | -0.09 |
| Soft drinks           | 0.1  | 0    | -0.11 |
| Non-coffee hot drinks | 3.0  | 0    | -0.03 |
| Coffee drinks         | 10.1 | 0.16 | 0.16  |
| Beer                  | 3.8  | 0    | -0.01 |
| Wine                  | 1.0  | 0    | -0.08 |
| Other                 | 3.3  | 0    | -0.02 |

GHG, greenhouse gas emissions; kgCO<sub>2</sub>e, kg of carbon dioxide equivalents

The 95% credible intervals of the post-tax estimates of the reduction in GHG emissions, revenue generated, and nutritional composition of the diet reflect the uncertainty surrounding the price elasticity estimates. Elasticities are estimated using a Markov Chain Monte Carlo procedure with 12,000 iterations and a burn-in of 2,000.

### Step 5 – identify population health implications of diet post tax

The effects of the introduction of a food based GHG emission tax on health are modelled using the DIETRON comparative risk assessment model to derive changes in mortality and identify the numbers of deaths averted with each scenario.<sup>41</sup> The DIETRON model uses age- and sex-specific relative risk estimates from meta-analyses to link the consumption of different food categories to mortality (figure 2+). Dietary input data are grams/day of fruit, vegetables, salt, and fibre, per cent of total energy derived from total fat, monounsaturated

1  
2  
3  
4  
5  
6  
7  
8  
9  
10  
11  
12  
13  
14  
15  
16  
17  
18  
19  
20  
21  
22  
23  
24  
25  
26  
27  
28  
29  
30  
31  
32  
33  
34  
35  
36  
37  
38  
39  
40  
41  
42  
43  
44  
45  
46  
47  
48  
49  
50  
51  
52  
53  
54  
55  
56  
57  
58  
59  
60

fatty acids, polyunsaturated fatty acids, saturated fatty acids, trans fatty acids, and dietary cholesterol, and total energy intake in kilocalories/day (kcal/day).<sup>41</sup> Changes in the mortality burden of coronary heart disease, stroke, and cancer are modelled via the intermediary risk factors of blood pressure, blood cholesterol, and obesity. The DIETRON model derives 95% credible intervals using 5,000 iterations of a Monte Carlo analysis to account for the uncertainty of the relationship between the dietary changes and mortality outcomes reported in the literature. The values for all of the parameters in the DIETRON model, and the sources from which they are drawn, are provided in the supplementary data of an open access journal article and the complete model is available from the authors on request.<sup>42</sup>

Following the change in UK population diet, the number of people consuming less than the recommended daily intake of vitamins A and B12, calcium, iron, and zinc are estimated. Consumption of micronutrients are assumed to follow a log-normal distribution with mean and standard deviation taken from the National Diet and Nutrition Survey (NDNS) years 1 and 2 (2008/9 – 2009/10).<sup>43</sup> NDNS collects four-day food diaries for 2126 participants as well as blood samples to help assess nutritional status; when calculating the distributions we used total micronutrients consumed including supplements. Where recommended daily intakes vary between men and women, the average is used.<sup>44</sup>

## RESULTS

Table 2 shows that following tax scenarios (a) and (b) the largest changes in consumption occurred with beef (14.32% reduction in scenario (a), 13.74% in scenario (b)) and lamb (14.10% and 13.9% reductions in scenarios (a) and (b) respectively). Unlike scenario (a), scenario (b) led to increases in the consumption of milk, fruit juice, fresh fruit, and vegetable fats/potatoes by more than 4%, and small reductions in the consumption of alcohol (although uncertainty estimates surrounding changes in fruit and alcohol consumption included 0%). Unlike scenario (a), scenario (b) also resulted in a 5.04% increase in sugar and preserves consumption and a 12.93% increase in soft drink consumption (compared to a 2.40% non-significant reduction in scenario (a)).

**Table 2. Percentage change in consumption of different food groups following the implementation of tax scenarios (a) and (b).**

| Food group          | Scenario (a) (95% CIs)                | Scenario (b) (95% CIs)    |
|---------------------|---------------------------------------|---------------------------|
|                     | Total change in quantity consumed (%) |                           |
| Milk                | -1.09 (-2.00 to -0.17)                | +4.96 (+3.61 to +6.31)    |
| Other milk products | -0.71 (-1.30 to -0.12)                | +0.90 (+0.24 to +1.55)    |
| Cream               | +0.00 (-0.00 to +0.00)                | +0.62 (+0.12 to +1.12)    |
| Cheese              | -0.38 (-0.70 to -0.07)                | +0.34 (-0.02 to +0.70)    |
| Eggs                | -0.43 (-0.58 to -0.28)                | -0.37 (-0.67 to -0.09)    |
| Pork                | -0.86 (-1.29 to -0.44)                | -0.69 (-1.13 to -0.26)    |
| Beef                | -14.28 (-17.93 to -10.63)             | -14.21 (-17.86 to -10.56) |
| Poultry             | -0.19 (-0.50 to +0.13)                | -0.09 (-0.41 to +0.22)    |

|                                         |                                       |                           |
|-----------------------------------------|---------------------------------------|---------------------------|
| Lamb                                    | -14.00 (-23.92 to -4.09)              | -14.00 (-23.92 to -4.09)  |
| Other meat                              | -9.33 (-10.73 to -7.93)               | -8.98 (-10.39 to -7.58)   |
| Fish                                    | -0.83 (-1.67 to +0.01)                | -0.73 (-1.51 to +0.04)    |
| Bread, cereals, flour, and other starch | -0.71 (-2.87 to +1.45)                | +1.76 (-0.57 to +4.09)    |
| Cakes, buns, pastries, and biscuits     | -0.27 (-1.09 to +0.55)                | +1.48 (+0.57 to +2.38)    |
| Animal fats                             | -13.26 (-16.11 to -10.41)             | -13.13 (-16.03 to -10.23) |
| Vegetable fats                          | +6.55 (+4.31 to +8.79)                | +7.46 (+4.94 to +9.99)    |
| Sugar and preserves                     | -0.02 (-0.08 to +0.04)                | +5.14 (+4.82 to +5.46)    |
| Sweets                                  | -0.12 (-0.36 to +0.12)                | +0.66 (+0.35 to +0.98)    |
| Tinned and dried fruit, and nuts        | +0.08 (-0.05 to +0.21)                | +1.26 (+0.98 to +1.54)    |
| Fresh fruit                             | +4.47 (-2.32 to +11.25)               | +6.77 (-0.53 to +14.08)   |
| Potatoes                                | -0.77 (-1.10 to -0.46)                | +2.53 (+2.04 to +3.01)    |
| Canned vegetables                       | -1.38 (-1.90 to -0.85)                | +0.58 (+0.05 to +1.11)    |
| Fresh vegetables                        | -2.57 (-3.54 to -1.61)                | +0.21 (-0.77 to +1.18)    |
| Fruit juice                             | -0.15 (-0.32 to +0.02)                | +6.78 (+5.28 to +8.27)    |
| Soft drinks                             | -2.36 (-5.01 to +0.29)                | +13.06 (+9.62 to +16.51)  |
| Non-coffee drinks                       | -0.75 (-1.59 to +0.10)                | +0.01 (-0.95 to +0.96)    |
| Coffee drinks                           | -1.95 (-2.98 to -0.93)                | -1.43 (-2.61 to -0.26)    |
| Beer                                    | -0.37 (-1.45 to +0.70)                | -0.17 (-1.02 to +0.68)    |
| Wine                                    | -1.68 (-6.43 to +3.07)                | -1.38 (-5.06 to +2.31)    |
| Other alcoholic beverages               | -0.28 (-1.10 to +0.53)                | -0.26 (-0.90 to +0.37)    |
| CI, confidence interval                 |                                       |                           |
| Food group                              | Scenario (a) (95% CIs)                | Scenario (b) (95% CIs)    |
|                                         | Total change in quantity consumed (%) |                           |

|                                                |                                  |                                  |
|------------------------------------------------|----------------------------------|----------------------------------|
| <u>Milk</u>                                    | <u>-0.25 (-0.44 to -0.06)</u>    | <u>+6.19 (+5.11 to +7.26)</u>    |
| <u>Other milk products</u>                     | <u>-0.24 (-0.41 to -0.61)</u>    | <u>+1.79 (+1.29 to +2.28)</u>    |
| <u>Cream</u>                                   | <u>-0.03 (-0.13 to +0.06)</u>    | <u>+0.15 (-1.42 to +1.71)</u>    |
| <u>Cheese</u>                                  | <u>-0.19 (-0.32 to -0.07)</u>    | <u>+0.86 (+0.47 to +1.25)</u>    |
| <u>Eggs</u>                                    | <u>-0.51 (-0.76 to -0.25)</u>    | <u>-0.19 (-1.20 to +0.82)</u>    |
| <u>Pork</u>                                    | <u>-1.20 (-1.51 to -0.89)</u>    | <u>-0.67 (-1.04 to -0.31)</u>    |
| <u>Beef</u>                                    | <u>-14.22 (-17.88 to -10.56)</u> | <u>-13.71 (-17.35 to -10.01)</u> |
| <u>Poultry</u>                                 | <u>-0.23 (-0.53 to +0.07)</u>    | <u>-0.30 (-0.06 to +0.67)</u>    |
| <u>Lamb</u>                                    | <u>-14.14 (-23.78 to -4.51)</u>  | <u>-13.91 (-23.55 to -4.27)</u>  |
| <u>Other meat</u>                              | <u>-9.81 (-11.22 to -8.39)</u>   | <u>-9.13 (-10.55 to -7.71)</u>   |
| <u>Fish</u>                                    | <u>-0.95 (-1.89 to -0.00)</u>    | <u>-0.43 (-1.07 to +0.20)</u>    |
| <u>Bread, cereals, flour, and other starch</u> | <u>-0.35 (-0.52 to -0.19)</u>    | <u>+2.21 (+1.83 to +2.59)</u>    |
| <u>Cakes, buns, pastries, and biscuits</u>     | <u>-0.29 (-0.44 to -0.15)</u>    | <u>+1.29 (+0.93 to +1.65)</u>    |
| <u>Animal fats</u>                             | <u>-13.25 (-16.10 to -10.40)</u> | <u>-13.32 (-16.26 to -10.37)</u> |
| <u>Vegetable fats</u>                          | <u>+1.09 (-0.19 to +2.36)</u>    | <u>+1.62 (+0.20 to +3.05)</u>    |
| <u>Sugar and preserves</u>                     | <u>-0.14 (-0.64 to +0.35)</u>    | <u>+5.04 (+4.46 to +5.63)</u>    |
| <u>Sweets</u>                                  | <u>-0.20 (-0.61 to +0.20)</u>    | <u>+0.91 (+0.17 to +1.66)</u>    |
| <u>Tinned and dried fruit, and nuts</u>        | <u>+0.07 (-0.04 to +0.17)</u>    | <u>+0.96 (+0.60 to +1.31)</u>    |
| <u>Fresh fruit</u>                             | <u>+0.18 (-0.08 to +0.43)</u>    | <u>+3.49 (+2.79 to +4.18)</u>    |
| <u>Potatoes</u>                                | <u>-0.27 (-0.38 to -0.15)</u>    | <u>+3.08 (+2.68 to +3.49)</u>    |
| <u>Canned vegetables</u>                       | <u>-0.36 (-0.50 to -0.22)</u>    | <u>+1.67 (+1.32 to +2.02)</u>    |
| <u>Fresh vegetables</u>                        | <u>-0.41 (-0.56 to -0.26)</u>    | <u>+2.39 (+1.96 to +2.82)</u>    |
| <u>Fruit juice</u>                             | <u>-0.12 (-0.26 to +0.03)</u>    | <u>+9.97 (+7.61 to +12.32)</u>   |
| <u>Soft drinks</u>                             | <u>-0.20 (-0.45 to +0.04)</u>    | <u>+12.95 (+11.16 to</u>         |

|                                  |                               |                               |
|----------------------------------|-------------------------------|-------------------------------|
|                                  |                               | <u>+14.74)</u>                |
| <u>Non-coffee drinks</u>         | <u>-0.16 (-0.37 to +0.05)</u> | <u>+0.26 (-0.29 to +0.82)</u> |
| <u>Coffee drinks</u>             | <u>-1.20 (-1.41 to -0.99)</u> | <u>-1.11 (-1.71 to -0.51)</u> |
| <u>Beer</u>                      | <u>-0.13 (-0.54 to +0.29)</u> | <u>+0.06 (-0.70 to +0.82)</u> |
| <u>Wine</u>                      | <u>-0.15 (-0.63 to +0.33)</u> | <u>+0.77 (-0.12 to +1.66)</u> |
| <u>Other alcoholic beverages</u> | <u>-0.12 (-0.52 to +0.28)</u> | <u>-0.07 (-0.80 to +0.66)</u> |
| <u>CI, confidence interval</u>   |                               |                               |

Tax scenario (a) predicted a change in energy intake from 2,027 kcals/day to 1,9992,004 kcals/day (95% credible intervals: 1,9971,992 kcals/day to 2,00217 kcals/day), a 1.44% reduction (table 3). There were also overall reductions in consumption of cholesterol, saturated fatty acids, polyunsaturated fatty acids, and total fat, and in zinc, vitamin A, and vitamin B12 by more than 2% (mean levels of zinc, vitamins A, and vitamin B12 remained above the UK daily recommended intake). All other nutrients and dietary constituents increased or decreased by less than 2%.

Tax scenario (b) resulted in an increase in calorie consumption from 2,027kcals/day to 2,04851kcals/day (2,04438kcals/day to 2,05264kcals per day), a 1.02% increase (table 3). In this scenario there was a reduction in cholesterol consumption of 2.2%, and increases in consumption of fruit and vegetables, calcium, polyunsaturated fatty acids, and sugar of over 2%. The remaining nutrients did not vary from baseline by more than 2%.

**Table 3. Nutrient composition of baseline diet and diets following tax scenarios (a) and (b), alongside UK recommended daily intakes.**

|                                 | Baseline | Scenario (a)<br>(95% CIs) | Scenario (b)<br>(95% CIs) | Recommended<br>daily intake <sup>44</sup> |
|---------------------------------|----------|---------------------------|---------------------------|-------------------------------------------|
| Energy (kcal/day)               | 2,027    | 2,004 (1,991 to 2,017)    | 2,051 (2,038 to 2,064)    | Female: 2,000;<br>Male: 2,500             |
| Total fat (g/day)               | 84.2     | 83.3 (82.8 to 83.7)       | 84.4 (83.9 to 84.9)       |                                           |
| SAFAs (g/day)                   | 32.5     | 31.7 (31.6 to 31.9)       | 32.2 (32.0 to 32.3)       | Female: <20;<br>Male: <30                 |
| MUFAs (g/day)                   | 31.0     | 30.6 (30.5 to 30.8)       | 31.0 (30.8 to 31.2)       |                                           |
| PUFAs (g/day)                   | 15.3     | 15.5 (15.3 to 15.6)       | 15.7 (15.5 to 15.8)       |                                           |
| Cholesterol (mg/day)            | 230.0    | 223.1 (222.1 to 223.9)    | 225.0 (224.1 to 225.8)    |                                           |
| Fibre (g/day)                   | 13.1     | 13.0 (12.9 to 13.2)       | 13.3 (13.2 to 13.5)       | 18                                        |
| Salt (g/day)                    | 6.3      | 6.2 (6.2 to 6.2)          | 6.3 (6.3 to 6.3)          | 6                                         |
| Fruit and vegetables<br>(g/day) | 344.2    | 345.1 (337.3 to 352.9)    | 354.9 (346.8 to 363.2)    | 400                                       |
| Iron (mg/day)                   | 10.6     | 10.4 (10.3 to 10.5)       | 10.6 (10.5 to 10.7)       | Female: 14.8;<br>Male: 8.7                |
| Calcium (mg/day)                | 889.1    | 880.5 (874.4 to 886.4)    | 909.2 (902.6 to 915.6)    | 700                                       |
| Zinc (mg/day)                   | 8.2      | 8.0 (7.9 to 8.0)          | 8.1 (8.1 to 8.2)          | Female: 4-7;                              |

|                                                                                                                               |                 |                                  |                                  |                                                  |
|-------------------------------------------------------------------------------------------------------------------------------|-----------------|----------------------------------|----------------------------------|--------------------------------------------------|
|                                                                                                                               |                 |                                  |                                  | Male: 5.5-9.5                                    |
| Vitamin A (µg/day)                                                                                                            | 803.6           | 778.7 (774.5 to 782.8)           | 793.5 (789.3 to 797.5)           | Female: 600;<br>Male: 700                        |
| Vitamin D (µg/day)                                                                                                            | 2.7             | 2.7 (2.7 to 2.7)                 | 2.7 (2.7 to 2.7)                 | Variable                                         |
| Vitamin B12 (µg/day)                                                                                                          | 5.7             | 5.6 (5.5 to 5.6)                 | 5.7 (5.7 to 5.8)                 | 1.5                                              |
| Total sugar (g/day)                                                                                                           | 115.4           | 115.0 (114.0 to 116.0)           | 120.2 (119.2 to 121.2)           |                                                  |
| SAFAs, saturated fatty acids; MUFAs, mono-unsaturated fatty acids; PUFAs, poly-unsaturated fatty acids; CI, credible interval |                 |                                  |                                  |                                                  |
|                                                                                                                               | <u>Baseline</u> | <u>Scenario (a)</u><br>(95% CIs) | <u>Scenario (b)</u><br>(95% CIs) | <u>Recommended</u><br>daily intake <sup>44</sup> |
| <u>Energy (kcal/day)</u>                                                                                                      | <u>2,027</u>    | <u>1,999 (1,997 to 2,002)</u>    | <u>2,048 (2,044 to 2,051)</u>    | <u>Female: 2,000;</u><br><u>Male: 2,500</u>      |
| <u>Total fat (g/day)</u>                                                                                                      | <u>84.2</u>     | <u>82.4 (82.2 to 82.6)</u>       | <u>83.6 (83.4 to 83.9)</u>       |                                                  |
| <u>SAFAs (g/day)</u>                                                                                                          | <u>32.5</u>     | <u>31.6 (31.5 to 31.7)</u>       | <u>32.1 (32.0 to 32.2)</u>       | <u>Female: &lt;20;</u><br><u>Male: &lt;30</u>    |
| <u>MUFAs (g/day)</u>                                                                                                          | <u>31.0</u>     | <u>30.3 (30.2 to 30.4)</u>       | <u>30.7 (30.6 to 30.8)</u>       |                                                  |
| <u>PUFAs (g/day)</u>                                                                                                          | <u>15.3</u>     | <u>15.2 (15.1 to 15.2)</u>       | <u>15.4 (15.3 to 15.4)</u>       |                                                  |
| <u>Cholesterol (mg/day)</u>                                                                                                   | <u>230.0</u>    | <u>222.6 (221.8 to 223.3)</u>    | <u>225.1 (224.1 to 226.0)</u>    |                                                  |
| <u>Fibre (g/day)</u>                                                                                                          | <u>13.1</u>     | <u>13.1 (13.0 to 13.1)</u>       | <u>13.4 (13.4 to 13.4)</u>       | <u>18</u>                                        |

|                                     |              |                               |                               |                                             |
|-------------------------------------|--------------|-------------------------------|-------------------------------|---------------------------------------------|
|                                     |              | <u>13.1)</u>                  | <u>13.4)</u>                  |                                             |
| <u>Salt (g/day)</u>                 | <u>6.3</u>   | <u>6.2 (6.2 to 6.2)</u>       | <u>6.3 (6.3 to 6.3)</u>       | <u>6</u>                                    |
| <u>Fruit and vegetables (g/day)</u> | <u>344.2</u> | <u>343.6 (343.2 to 344.1)</u> | <u>355.9 (354.4 to 357.3)</u> | <u>400</u>                                  |
| <u>Iron (mg/day)</u>                | <u>10.6</u>  | <u>10.4 (10.4 to 10.4)</u>    | <u>10.6 (10.6 to 10.7)</u>    | <u>Female: 14.8;</u><br><u>Male: 8.7</u>    |
| <u>Calcium (mg/day)</u>             | <u>889.1</u> | <u>884.3 (883.4 to 885.2)</u> | <u>915.1 (911.9 to 918.5)</u> | <u>700</u>                                  |
| <u>Zinc (mg/day)</u>                | <u>8.2</u>   | <u>8.0 (8.0 to 8.0)</u>       | <u>8.2 (8.1 to 8.2)</u>       | <u>Female: 4-7;</u><br><u>Male: 5.5-9.5</u> |
| <u>Vitamin A (µg /day)</u>          | <u>803.6</u> | <u>778.4 (775.6 to 780.9)</u> | <u>793.7 (790.6 to 796.6)</u> | <u>Female: 600;</u><br><u>Male: 700</u>     |
| <u>Vitamin D (µg /day)</u>          | <u>2.7</u>   | <u>2.6 (2.6 to 2.6)</u>       | <u>2.7 (2.7 to 2.7)</u>       | <u>Variable</u>                             |
| <u>Vitamin B12 (µg/day)</u>         | <u>5.7</u>   | <u>5.6 (5.6 to 5.6)</u>       | <u>5.8 (5.7 to 5.8)</u>       | <u>1.5</u>                                  |
| <u>Total sugar (g/day)</u>          | <u>115.4</u> | <u>115.0 (114.9 to 115.2)</u> | <u>120.3 (119.8 to 120.6)</u> |                                             |

SAFAs, saturated fatty acids; MUFAs, mono-unsaturated fatty acids; PUFAs, poly-unsaturated fatty acids; CI, credible interval

Following changes in nutrient consumption, tax scenarios (a) and (b) predict shifts in the number of people consuming below the recommended daily amounts of dietary

micronutrients (supplementary table S1).<sup>44</sup> Following tax scenario (a), over ~~1,000,000~~ 900,000 extra people consumed less than the recommended daily intake of vitamin A, zinc, and iron.

Tax scenario (b) predicted 1, ~~507~~ 472,000 extra people would be consuming greater than the recommended daily intake of calcium.

1  
2  
3  
4  
5  
6  
7  
8  
9  
10  
11  
12  
13  
14  
15  
16  
17  
18  
19  
20  
21  
22  
23  
24  
25  
26  
27  
28  
29  
30  
31  
32  
33  
34  
35  
36  
37  
38  
39  
40  
41  
42  
43  
44  
45  
46  
47  
48  
49  
50  
51  
52  
53  
54  
55  
56  
57  
58  
59  
60

Scenario (a) predicted ~~6,751~~7,768 deaths delayed or averted in the UK population per year (95% credible intervals: ~~7,151~~6,147 deaths to ~~7,346~~8,382 deaths), and ~~2,156~~448 delayed or averted in people under 75 years old (table 4). Most of the reduction in deaths was due to fewer calories consumed; this leads to changes in population obesity prevalence and a lower burden of cardiovascular disease (tables 4 and 5). If energy intake were to have stayed the same, the improvement in dietary quality would have led to ~~805~~1,207 deaths (~~1,003~~476 to ~~1,431~~1,131) delayed or averted.

Scenario (b) predicted an increase in deaths in the UK population of ~~3,721~~2,685 (~~2,984~~1,966 to ~~3,402~~4,464), and of ~~789~~477 in those less than 75 years old (table 4). The increase in deaths was due to increased calories consumed, again leading to a change in obesity prevalence and a greater burden of cardiovascular disease (tables 4 and 5). If energy intake were to have stayed the same, the increase in dietary quality would have led to ~~2,758~~2,536 (~~2,278~~195 to ~~3,232~~2,896) deaths delayed or averted.

**Table 4. Total deaths delayed or averted by age, and deaths delayed or averted from nutritional changes in the diet following taxation scenarios (a) and (b)<sup>a</sup>.**

|       | Deaths averted or delayed, scenarios (a) and (b) |                                               |                                               |                                               |
|-------|--------------------------------------------------|-----------------------------------------------|-----------------------------------------------|-----------------------------------------------|
|       | Scenario (a) (95% CIs)                           |                                               | Scenario (b) (95% CIs)                        |                                               |
|       | Energy intake changes                            | Energy intake stays the same                  | Energy intake changes                         | Energy intake stays the same                  |
| Total | <del>6,751</del> (6,147 to <del>7,347</del> )    | <del>1,435</del> (1,135 to <del>1,729</del> ) | <del>3,721</del> (4,464 to <del>2,984</del> ) | <del>2,374</del> (2,003 to <del>2,750</del> ) |

|                                                         |                               |                                     |                               |                                     |
|---------------------------------------------------------|-------------------------------|-------------------------------------|-------------------------------|-------------------------------------|
| Total under 75 years                                    | 2,156 (1,964 to 2,338)        | 602 (486 to 715)                    | -789 (-1040 to -545)          | 977 (835 to 1,119)                  |
| Fruit and vegetables                                    | 270 (-26 to 555)              | 923 (646 to 1,208)                  | 1,930 (1,515 to 2,349)        | 1,252 (916 to 1,589)                |
| Fibre                                                   | -171 (-72 to -273)            | 170 (74 to 268)                     | 336 (142 to 536)              | 170 (72 to 266)                     |
| Fats                                                    | 318 (255 to 387)              | 290 (232 to 351)                    | 500 (396 to 620)              | 537 (427 to 661)                    |
| Salt                                                    | 321 (383 to 446)              | 0*                                  | 0*                            | 383 (323 to 445)                    |
| Energy balance                                          | 5,909 (5,411 to 6,414)        | 0*                                  | -6,600 (-7,154 to -6,029)     | 0*                                  |
| Alcohol consumption                                     | 58 (42 to 73)                 | 57 (42 to 73)                       | 36 (26 to 46)                 | 36 (27 to 46)                       |
| <u>Deaths averted or delayed, scenarios (a) and (b)</u> |                               |                                     |                               |                                     |
|                                                         | <u>Scenario (a) (95% CIs)</u> |                                     | <u>Scenario (b) (95% CIs)</u> |                                     |
|                                                         | <u>Energy intake changes</u>  | <u>Energy intake stays the same</u> | <u>Energy intake changes</u>  | <u>Energy intake stays the same</u> |
| Total                                                   | 7,768 (7,151 to 8,392)        | 1,207 (1,003 to 1,431)              | -2,685 (-3,402 to -1,966)     | 2,536 (2,195 to 2,896)              |
| Total under 75 years                                    | 2,448 (2,254 to 2,638)        | 463 (386 to 542)                    | -477 (-719 to -233)           | 1,082 (945 to 1,223)                |
| Fruit and vegetables                                    | -75 (-124 to -26)             | 696 (540 to 857)                    | 1,996 (1,570 to 2,420)        | 1,414 (1,118 to 1,712)              |
| Fibre                                                   | -118 (-50 to -185)            | 188 (79 to 298)                     | 439 (185 to 695)              | 204 (83 to 326)                     |

|                     |                        |                     |                           |                  |
|---------------------|------------------------|---------------------|---------------------------|------------------|
| Fats                | 410 (324 to 512)       | 373 (292 to 464)    | 577 (432 to 735)          | 601 (454 to 765) |
| Salt                | 426 (356 to 496)       | 98 (81 to 114)      | -32 (-37 to -26)          | 216 (181 to 252) |
| Energy balance      | 7,124 (6,511 to 7,737) | 0*                  | -5,726 (-6,212 to -5,229) | 0*               |
| Alcohol consumption | 15 (11 to 19)          | -148 (-187 to -107) | -13 (-16 to -9)           | 108 (79 to 137)  |

CI, credible interval.

<sup>a</sup>Numbers for each dietary component do not add up to the overall total of deaths delayed or averted because the DIETRON model accounts for double counting of different nutritional components contributing to the same cause of mortality<sup>41</sup>. Positive numbers indicate deaths delayed or averted.

\*Where there is no change in nutrient consumption there is no parameter to vary for the uncertainty analysis for health outcomes and therefore there are no CIs calculated for these dietary components

**Table 5. Total deaths delayed or averted by cause following taxation scenarios (a) and (b) allowing for energy intake to change.**

|                        | <del>Deaths averted or delayed<sup>a</sup></del> |                           |
|------------------------|--------------------------------------------------|---------------------------|
|                        | Scenario (a) (95% CIs)                           | Scenario (b) (95% CIs)    |
| Cardiovascular disease | 4,915 (4,379 to 5,461)                           | -2,823 (-3,484 to -2,176) |
| Diabetes               | 398 (315 to 483)                                 | -459 (-562 to -360)       |
| Cancer                 | 1,032 (824 to 1,227)                             | -21 (-329 to 283)         |
| Kidney disease         | 65 (32 to 101)                                   | -73 (-114 to -33)         |
| Liver disease          | 350 (244 to 461)                                 | -346 (-471 to -227)       |

|                               | <u>Deaths averted or delayed<sup>a</sup></u> |                                  |
|-------------------------------|----------------------------------------------|----------------------------------|
|                               | <u>Scenario (a) (95% CIs)</u>                | <u>Scenario (b) (95% CIs)</u>    |
| <u>Cardiovascular disease</u> | <u>5,845 (5,274 to 6,410)</u>                | <u>-1,937 (-2,583 to -1,293)</u> |
| <u>Diabetes</u>               | <u>477 (381 to 580)</u>                      | <u>-399 (-486 to -313)</u>       |
| <u>Cancer</u>                 | <u>969 (798 to 1,138)</u>                    | <u>30 (-240 to 305)</u>          |
| <u>Kidney disease</u>         | <u>79 (39 to 123)</u>                        | <u>-63 (-100 to -32)</u>         |
| <u>Liver disease</u>          | <u>392 (264 to 524)</u>                      | <u>-323 (-434 to -217)</u>       |

CI, credible intervals

<sup>a</sup>Positive numbers indicate deaths delayed or averted.

In scenario (a), 753% of deaths averted were due to a reduction in cardiovascular disease, and 152% to cancer; in scenario (b), 726% of the increase in premature deaths was due to an increase in cardiovascular disease (table 5).

Table 6 shows that scenario (a) resulted in a reduction in GHG emissions of 18,765,683 ktCO<sub>2</sub>e (95% credible intervals, 14,665,74 ktCO<sub>2</sub>e to 22,8893,022 ktCO<sub>2</sub>e). The predicted revenue generated from this scenario was £2,0238 million (£1,9805 million to £2,0684 million). Scenario (b) resulted in a +6,126,15,228 ktCO<sub>2</sub>e (121,245,002 ktCO<sub>2</sub>e to 20,406,19,492 ktCO<sub>2</sub>e) reduction in GHG emissions. The reduction in emissions attributable to land-use change in scenario (a) accounted for 765% of the total reduction, and for 842% in scenario (b).

**Table 6. Reduction in greenhouse gas emissions and revenue generated from tax scenarios (a) and (b).**

|                                              | Scenario (a) (95% CIs)                            | Scenario (b) (95% CIs)                        |
|----------------------------------------------|---------------------------------------------------|-----------------------------------------------|
| Reduction in total emissions                 | 18,765 ktCO <sub>2</sub> e (14,674 to 23,022)     | 16,126 ktCO <sub>2</sub> e (12,002 to 20,406) |
| Reduction in emissions from land-used change | 14,128 ktCO <sub>2</sub> e (10,994 to 17,404)     | 13,282 ktCO <sub>2</sub> e (10,141 to 16,558) |
| Revenue generated                            | £2,028 million (1,985 million to 2,068 million)   | N/A                                           |
|                                              | Scenario (a) (95% CIs)                            | Scenario (b) (95% CIs)                        |
| Reduction in total emissions                 | 18,683 ktCO <sub>2</sub> e (14,665 to 22,889)     | 15,228 ktCO <sub>2</sub> e (11,245 to 19,492) |
| Reduction in emissions from land-used change | 14,138 ktCO <sub>2</sub> e (11,042 to 17,377)     | 12,837 ktCO <sub>2</sub> e (9,744 to 16,090)  |
| Revenue generated                            | £2,023 million (£1,980 million to £2,064 million) | N/A                                           |

CI, credible intervals; ktCO<sub>2</sub>e, kilotonne of carbon dioxide equivalents

## DISCUSSION

Our results show that fiscal interventions to reduce GHG emissions from the food sector may have health co-benefits. In scenario (a), taxation at a rate of £2.72/tCO<sub>2</sub>e/100g product has the potential to reduce the burden of premature deaths in the UK by ~~nearly 7,007,680~~ per year (1.42% of all UK deaths)<sup>45</sup> at the same time as reducing food related GHG emissions by ~~18,765,683~~ ktCO<sub>2</sub>e and generating up to £2.023 billion revenue. When subsidising products with GHG emissions lower than the average emissions per kg of food consumed in the UK (scenario (b)), we predict a reduction in emissions of ~~16,126,15,228~~ ktCO<sub>2</sub>e with an increase in premature mortality of ~~3,721,2,685~~ (0.57% of UK deaths)<sup>45</sup>.

Scenario (b) (revenue neutral) demonstrates how health and sustainability goals are not always aligned and results in some proposed price changes that run against the current trend in public health (e.g. subsidising sugar and soft drinks by 11p per kg due to the low level of GHG emissions associated with sugar). The relationship between food consumption and health is more politically prominent than that between food consumption and the environment, and therefore it is unlikely that a taxation system could be introduced that did not take account of effects on health and address them.

A concern regarding diets that would lead to reduced GHG emissions is that they may result in a decrease in consumption of essential micronutrients. Both modelled scenarios maintain the same broad micronutrient composition as the baseline diet with only moderate reductions in mean vitamin A and vitamin B12 consumption seen in scenario (a) (but these were still within recommended daily levels). Despite small absolute percentage changes in micronutrient consumption, at a population level there may be significant changes to the

1  
2  
3  
4  
5  
6  
7  
8  
9  
10  
11  
12  
13  
14  
15  
16  
17  
18  
19  
20  
21  
22  
23  
24  
25  
26  
27  
28  
29  
30  
31  
32  
33  
34  
35  
36  
37  
38  
39  
40  
41  
42  
43  
44  
45  
46  
47  
48  
49  
50  
51  
52  
53  
54  
55  
56  
57  
58  
59  
60

number of people consuming below the recommended daily intakes (supplementary table S1).

**Strengths and limitations**

This study is the first to model the impact on population mortality of internalising the societal cost of food-related GHG emissions through increasing price. A strength of this work is that we are able to estimate the effect of price changes on both the taxed product, and on substituting and complementing products. Furthermore both consumption and price elasticity data are derived from the same dataset (LCF), resulting in more accurate modelling of the changes in purchasing and consumption than previous modelling studies in this area.<sup>20,22</sup>

Limitations of this work include that the estimates of GHG emissions of some products are assumed to be identical to related products (for example all tree fruits except oranges are assumed to be the same as apples), and non-UK data are used in some circumstances (for example with fish).<sup>38</sup> Estimates of GHG emissions for some imported products are not known and are assumed to be the same as imported products from elsewhere in the world.

~~Furthermore,~~ GHG emissions from land-use change are likely to vary significantly between and within countries and these variations are not captured by this research. Furthermore, the uncertainties surrounding the estimations of GHG emissions are not modelled; these will vary between different food products and between different producers with some (such as milk and beef)<sup>46</sup> having greater uncertainty than others.<sup>38</sup> The LCF has a significant non-response rate (50% response rate in Great Britain, and 59% in Northern Ireland) and although the results are weighted for non-response, the results may not be representative of the UK population with certain age and income groups likely to be under-sampled.<sup>47</sup>

In this study, we base estimates of pre- and post-tax diets on the mean population diet. Population diet will vary between individuals and they may respond to price changes differently both in terms of purchasing and food waste depending on their age and baseline consumption patterns. We do not account for these in our uncertainty estimates because the LCF reports at the household rather than individual level making it not possible to derive age or consumption specific price elasticities; our uncertainty estimates are therefore conservative. We are likely to have over-estimated the population consuming below recommended daily intakes because we chose to use adult recommendations but the mean and distributions of consumption are estimated for all ages. Furthermore, it was necessary to compromise between the number of food groups for which own- and cross-price elasticities are estimated, and the confidence with which those estimates were made; greater numbers of food groups results in less confidence in the estimates. We disaggregated the diet into 29 different groups and it is likely that within groups (for example, vegetable fats) certain constituents will vary (sunflower oil, rapeseed oil, etc.) but we assumed that the percentage change in consumption for any group applied to all foods within that group.

The uncertainty analyses from which the credible intervals are derived only estimate the parametric uncertainty attached to these estimates (for example the relationship between calorie intake and obesity), and cannot estimate the structural uncertainty (i.e. the uncertainty underlying the design of the model). Structural limitations include: the model assumes no time lag between changes in consumption behaviour and health outcomes; the model is cross-sectional and therefore cannot predict changes in life expectancy in the counterfactual scenario; it assumes that all non-food items will remain at the same price in the counterfactual scenario; and it assumes that reduction in consumption of broad food categories will be met equally by all items within that category.

1  
2  
3  
4  
5  
6  
7  
8  
9  
10  
11  
12  
13  
14  
15  
16  
17  
18  
19  
20  
21  
22  
23  
24  
25  
26  
27  
28  
29  
30  
31  
32  
33  
34  
35  
36  
37  
38  
39  
40  
41  
42  
43  
44  
45  
46  
47  
48  
49  
50  
51  
52  
53  
54  
55  
56  
57  
58  
59  
60

We assume that all food purchased is consumed; food waste is no longer accounted for in the LCF and it is possible that the change in purchasing resulting from price increases could have a smaller impact on consumption patterns through individuals reducing food waste. Therefore individuals may maintain calorie consumption with reduced food purchasing following higher prices, this is thought to be partly driving the reduction in UK food and drink wastage between 2009 and 2011, a period of rising food prices and falling disposable incomes.<sup>48</sup> There would likely be differential changes in food waste patterns with different price changes making modelling of these circumstances difficult.

In our study we assume that calorie consumption will change following the implementation of a tax. Both scenarios modelled in this paper show small changes in calorie intake (1.44% decrease in scenario (a) and 1.20% increase in scenario (b), table 3). Although the changes in calorie intake dominate the modelled changes in mortality (table 4), the changes are considerably fewer than calorie reductions modelled in previous studies of taxes on GHGs or soft drinks (where calories are not assumed to be replaced), which suggest that they are plausible.<sup>23,49,50</sup> Extra calories consumed in scenario (b) are primarily due to increases in consumption of bread and cereals, and milk and soft drinks.

In both scenarios (a) and (b), there is a reduction in premature deaths if energy intake remains the same indicating that the post-tax diet is healthier in other respects (table 4). Although this estimate assumes that the percentage change in calories required to keep energy intake the same leads to a diet with equivalent percentage changes to individual nutritional components. Finally, the health impact following the implementation of tax scenarios (a) and (b) is only quantified through the change in diet. We are likely to have underestimated the wider benefits

to health of reduced GHG emissions from reduced environmental pollution and slowed climate change both within the UK and around the world.

### Comparisons with other studies

The 2006 Stern Review assessed the implications of climate change on the global economy and described climate change as ‘the greatest and widest-ranging market failure ever seen’.<sup>35</sup> The review went on to calculate the social cost of carbon to society as \$25-\$30/tCO<sub>2</sub>e emitted (£16-19/tCO<sub>2</sub>e, 2000 prices; £21-£25/tCO<sub>2</sub>e, 2010 prices).<sup>35</sup> Our tax rates are not dissimilar to the social costs to society calculated by the Stern Review, and allow for direct comparison between our modelled reduction in GHG emissions to the Defra abatement statistics derived for the agriculture MACC.<sup>34</sup> We estimate that GHG emissions from production and land-use change for UK food consumption amount to 249,207 ktCO<sub>2</sub>e; the reduction in GHG emissions seen in scenario (a) of 18,765-683 ktCO<sub>2</sub>e equates to 7.5% of these emissions. This is substantially more than the 7,850 ktCO<sub>2</sub>e reduction in GHG emissions estimated by Defra’s agriculture MACC with an equivalent investment of £24.10/tCO<sub>2</sub>e (£27.19/tCO<sub>2</sub>e, 2010 prices).<sup>34</sup> However, unlike the agriculture MACC, our model incorporates emissions from UK consumed food that is produced overseas. Imported products account for the vast majority of emissions relating to land-use change. Without land-use change, the reduction in emissions from scenarios (a) and (b) are both less than that estimated by Moran et al. (2008) at 4,637-545 ktCO<sub>2</sub>e and 2,844-441 ktCO<sub>2</sub>e respectively.

Scenario (b) results in a reduction in GHG emissions of 16,126-15,228 ktCO<sub>2</sub>e which is less than the reduction in scenario (a). It may be expected that by subsidising foods with below-average GHG emissions there would be an even greater reduction in emissions than found in scenario (a); however, the effect of substituting to other foods, in particular to milk, means

1  
2  
3  
4  
5  
6  
7  
8  
9  
10  
11  
12  
13  
14  
15  
16  
17  
18  
19  
20  
21  
22  
23  
24  
25  
26  
27  
28  
29  
30  
31  
32  
33  
34  
35  
36  
37  
38  
39  
40  
41  
42  
43  
44  
45  
46  
47  
48  
49  
50  
51  
52  
53  
54  
55  
56  
57  
58  
59  
60

that the reduction in GHG emissions is not as marked. It should be noted that although scenario (b) results in an overall increase in calorie intake of 1.02% (because of increased food consumption) and scenario (a) results in a decrease of 1.44%, this makes little difference to the overall GHG emissions; if calorie consumption were to stay the same as baseline in both scenarios, there would still be an 18,552428 ktCO<sub>2</sub>e reduction in scenario (a) compared to 16,31615.436 ktCO<sub>2</sub>e reduction in scenario (b).

The number of deaths delayed or averted are fewer than those predicted by Scarborough et al. who modelled the health impact of three sustainable dietary scenarios,<sup>27</sup> and by Friel et al. who modelled the health benefits of various strategies to reduce agricultural GHG emissions.<sup>25</sup> However, neither study quantified realistic counterfactual dietary scenarios. Friel et al. modelled the effect on ischemic heart disease of a 30% reduction in livestock consumption leading to less saturated fat and cholesterol intake, without accounting for any effect of substituting food products,<sup>25</sup> and Scarborough et al., following the UK Committee on Climate Change Fourth Carbon Budget dietary scenarios, assumed that replacement calories from a 50% reduction in livestock consumption were exclusively derived from fruit, vegetables, and cereals.<sup>27</sup>

Edjabou and Smed investigated the impact of a GHG tax on food in Denmark and identify identical patterns of reductions in GHG emissions and subsequent changes to population food consumption as in our study.<sup>23</sup> Edjabou and Smed find that applying a non-tax neutral scenario results in a greater reduction in emissions than a tax neutral scenario, and that the non-tax neutral scenario reduces overall calorie consumption compared to an increase in the tax neutral model. Similarly both our model and the Edjabou and Smed model identify large reductions in saturated fat consumption alongside small changes in sugar consumption with

the non-neutral scenario, and the opposite following the tax neutral scenario. Edjabou and Smed's model does not include the effect of land-use change, and furthermore, their non-tax neutral scenario models the effect of increasing the price of all food rather than just food groups with above the average emissions. However, their estimate of the reduction in GHG emissions from food consumed in Denmark of between 4.0% and 7.9% using a tax rate of £19.10/tCO<sub>2</sub>e is comparable to the 7.5% reduction we observe in the equivalent scenario (a) with a tax rate of £27.20/tCO<sub>2</sub>e applied just to food groups with emissions greater than average.<sup>23</sup>

### Implications and future research

Scenario (a) is predicted to generate £2.032 billion revenue per annum. This represents a substantial amount of money that could be reinvested in GHG emission mitigation strategies in either the agriculture sector or elsewhere. However, revenue may also be spent on GHG producing projects that would otherwise have not been funded, thereby negating the reductions in GHG emissions seen with the changes in diet modelled here. Although our modelled tax scenarios lead to a healthier diet, scenario (a) would likely be economically regressive meaning that the poor spend proportionately more of their income on the tax than the rich. However, because those in lower socio-economic classes suffer from a greater prevalence of chronic disease<sup>51</sup> and are more sensitive to price changes,<sup>52</sup> the taxes are likely to be progressive in terms of health benefits. Further work should explicitly consider differential effects by socio-demographic group of internalising the societal cost of climate change in the food sector; this is not currently possible with our data. Alongside this work, there should be greater exploration of the effects of different tax rates and models to explore whether the synergies and conflicts identified in this research may be negated or reversed.

Our research also estimates a 14% reduction in lamb and beef consumption, which will have

1  
2  
3  
4  
5  
6  
7 significant negative economic implications for some farmers. We have not accounted for  
8 these wider economic impacts; appropriate reinvestment of the tax revenue may help to  
9 mitigate the negative consequences.  
10  
11

12  
13  
14 We are using taxation to internalise much of the cost to society of GHG emissions as it is a  
15 readily grasped mechanism for changing prices; however, these price changes could be  
16 realised through a different mechanism, e.g. carbon trading schemes that incorporate all  
17 GHGs relevant to agriculture. The taxes modelled here are not unrealistic; the highest rate of  
18 tax is £0.176/100g beef, which represents a price increase of approximately 15%-35%  
19 (depending on quality and type of beef purchased). This price increase is not dissimilar to  
20 Mytton et al.'s estimate of a 20% increase in the price of 'unhealthy' foods to give a  
21 significant population health benefit,<sup>18</sup> and is significantly less than the current tax on  
22 cigarettes of 16.5% of retail plus a further £3.35 per 20 cigarettes.<sup>53</sup> As discussed by Mytton  
23 et al., taxation of unhealthy food as a public health measure is beginning to gain traction in  
24 the developed world<sup>18</sup> yet the jump to taxing foods with high GHG emissions is unlikely to  
25 happen soon. Scenario (b) indicates that health and sustainability goals may not always be  
26 aligned and therefore an appropriate next step would be to investigate the health and  
27 environmental impacts of a combined GHG emission and unhealthy food tax (for example  
28 implementing tax scenario (a) alongside a tax on soft drinks).  
29  
30  
31  
32  
33  
34  
35  
36  
37  
38  
39  
40  
41  
42  
43  
44

45 **Conclusions**

46  
47 In the context of widespread global economic austerity and the estimated long term financial  
48 costs of carbon,<sup>35,54</sup> the health, economic, and environmental benefits make internalising  
49 these costs through a GHG emission tax on food a potential solution. Current projections  
50 estimate that the UK is unlikely to meet the 2050 target of an 80% reduction in GHG  
51  
52  
53  
54

emissions set by the Climate Change Act<sup>7,8</sup> and large changes to the food chain supply system would be required to achieve just a 70% reduction in emissions from agriculture (not including land-use change).<sup>38</sup> The careful use of market governance mechanisms will have a crucial role in reducing global agriculture GHG emissions and our results show that taxation offers a possible method to reduce GHG emissions, improve public health, and raise revenue simultaneously.

### **Funding**

None

### **Contributorship**

PS had the original idea for the study. AB coordinated the study, designed the study methodology and ran the modelling except for the calculation and application of price elasticities. RT designed the economic modelling for devising price elasticities. AK devised how to apply the tax strategy to price elasticities and ran the economic modelling. PS designed the model to determine health outcomes. AB wrote the initial draft of the manuscript. PS, AK, RT, TG, and MR all commented on and contributed to the study methodology and edited various drafts of the final manuscript.

### **Data sharing**

Price elasticity data are available from the authors on request. The values for all of the parameters in the DIETRON model, and the sources from which they are drawn, are provided in the supplementary data of an open access journal article and the complete model is available from the authors on request.

### **Competing Interests**

None

REFERENCES

1 Costello A, Abbas M, Allen A, *et al.* Managing the health effects of climate change: Lancet and University College London Institute for Global Health Commission. *The Lancet* 2009;**373**:1693–733.

2 Solomon S, Qin M, Manning M, *et al.* Section 2.10.2, Direct Global Warming Potentials, in Contribution of Working Group I to the Fourth Assessment Report of the Intergovernmental Panel on Climate Change. London: 2007. [http://www.ipcc.ch/publications\\_and\\_data/ar4/wg1/en/ch2s2-10-2.html](http://www.ipcc.ch/publications_and_data/ar4/wg1/en/ch2s2-10-2.html)

3 Bellarby J, Foereid B, Hastings A, *et al.* Cool farming: climate impacts of agriculture and mitigation potential. Amsterdam: 2008.

4 United Nations Environment Programme. Avoiding Future Famines: Strengthening the Ecological Foundation of Food Security through Sustainable Food Systems. Nairobi: 2012.

5 World Health Organisation. Protecting health from climate change. Geneva: 2009.

6 Brown K, Cardenas L, MacCarthy J, *et al.* UK Greenhouse Gas Inventory, 1990 to 2010. Annual report for submission under the Framework Convention on Climate Change. Didcot: 2012.

7 UK Government. Climate Change Act 2008. London: 2008. <http://www.legislation.gov.uk/ukpga/2008/27/contents>

8 Cambridge Econometrics. The decline in UK’s carbon emissions is set to accelerate after 2020 as power generation, helped by a rising flood price of carbon on fossil fuel inputs, makes good progress towards decarbonisation. Cambridge: 2011. <http://www.camecon.com/uk/ukenergy/pressrelease-UKenergy.aspx>

9 Foresight. The future of food and farming. Final project report. London: 2011.

10 Foley JA, Ramankutty N, Brauman KA, *et al.* Solutions for a cultivated planet. *Nature* 2011;**478**:337–42.

11 World Health Organisation. Diet, Nutrition and the Prevention of Chronic Diseases. Technical Report Series 916. Geneva: 2003.

12 Micha R, Wallace S, Mozaffarian D. Red and processed meat consumption and risk of incident coronary heart disease, stroke and diabetes mellitus. A systematic review and meta-analysis. *Circulation* 2010;**121**:2271–83.

13 Pan A, Sun Q, Bernstein AM, *et al.* Red meat consumption and mortality: results from 2 prospective cohort studies. *Archives of Internal Medicine* 2012;**172**:555–63.

14 Chan DS, Lau R, Aune D, *et al.* Red and processed meat and colorectal cancer incidence: meta-analysis of prospective studies. *PLoS One* 2011;**6**:e20456.

- 1  
2  
3  
4  
5  
6  
7 15 Aune D, Chan DSM, Lau R, *et al*. Dietary fibre, whole grains, and risk of colorectal cancer: systematic review and dose-response meta-analysis of prospective studies. *The British Medical Journal* 2011;**343**:d6617.
- 8  
9  
10 16 Dauchet L, Amouyel P, Dallongeville J. Fruit and vegetable consumption and risk of stroke: a meta-analysis of cohort studies. *Neurology* 2005;**65**:1193–7.
- 11  
12  
13 17 Dauchet L, Amouyel P, Hercberg S, *et al*. Fruit and vegetable consumption and risk of coronary heart disease: a meta-analysis of cohort studies. *Journal of Nutrition* 2006;**136**:2588–93.
- 14  
15  
16  
17 18 Mytton O, Clarke D, Rayner M. Taxing unhealthy food and drinks to improve health. *The British Medical Journal* 2012;**344**:e2931.
- 18  
19  
20 19 Thow AM, Jan S, Leeder S, *et al*. The effect of fiscal policy on diet, obesity and chronic disease: a systematic review. *Bulletin of the World Health Organisation* 2010;**88**:609–14.
- 21  
22  
23 20 Nnoaham KE, Sacks G, Rayner M, *et al*. Modelling income group differences in the health and economic impacts of targeted food taxes and subsidies. *International Journal of Epidemiology* 2009;**38**:1324–33.
- 24  
25  
26 21 Feng K, Hubacek K, Guan D, *et al*. Distributional effects of climate change taxation: the case of the UK. *Environmental Science and Technology* 2010;**44**:3670–6.
- 27  
28  
29 22 Wirsenius S, Hedenus F, Mohlin K. Greenhouse gas taxes on animal food products: Rationale, tax scheme and climate mitigation effects. *Climatic Change* 2011;**108**:159–84.
- 30  
31  
32 23 Edjabou L, Smed S. The effect of using consumption taxes on foods to promote climate friendly diets – The case of Denmark. *Food Policy* 2013;**39**:84–96.
- 33  
34  
35 24 McMichael AJ, Powles JW, Butler CD, *et al*. Food, livestock production, energy, climate change, and health. *The Lancet* 2007;**370**:1253–63.
- 36  
37  
38 25 Friel S, Dangour AD, Garnett T, *et al*. Public health benefits of strategies to reduce greenhouse-gas emissions: food and agriculture. *The Lancet* 2009;**374**:2016–25.
- 39  
40  
41 26 Garnett T. Cooking up a storm. Food, greenhouse gas emissions and our changing climate. Guildford: 2008.
- 42  
43  
44 27 Scarborough P, Allender S, Clarke D, *et al*. Modelling the health impact of environmentally sustainable dietary scenarios in the UK. *European Journal of Clinical Nutrition* 2012;**66**:710–5.
- 45  
46  
47 28 Vieux F, Soler L, Touazi D, *et al*. High nutritional quality is not associated with low greenhouse gas emissions in self-selected diets of French adults. *American Journal of Clinical Nutrition* 2013;**97**:569–83.
- 48  
49  
50  
51  
52  
53  
54  
55  
56  
57  
58  
59  
60

1  
2  
3  
4  
5  
6  
7  
8  
9  
10  
11  
12  
13  
14  
15  
16  
17  
18  
19  
20  
21  
22  
23  
24  
25  
26  
27  
28  
29  
30  
31  
32  
33  
34  
35  
36  
37  
38  
39  
40  
41  
42  
43  
44  
45  
46  
47  
48  
49  
50  
51  
52  
53  
54  
55  
56  
57  
58  
59  
60

29 Saxe H, Larsen TM, Mogensen L. The global warming potential of two healthy Nordic diets compared with the average Danish diet. *Climatic Change* 2013;**116**:249–62.

30 Macdiarmid J, Kyle J, Horgan G, *et al*. Livewell: a balance of healthy and sustainable food choices. London: 2011.

31 Macdiarmid J, Kyle J, Horgan G, *et al*. Sustainable diets for the future: can we contribute to reducing greenhouse gas emissions by eating a healthy diet? *American Journal of Clinical Nutrition* 2012;**96**:632–9.

32 Aston LM, Smith JN, Powles JW. Impact of a reduced red and processed meat dietary pattern on disease risks and greenhouse gas emissions in the UK: a modelling study . *BMJ Open* 2012;**2** . doi:10.1136/bmjopen-2012-001072

33 Wilson N, Nghiem N, Ni Mhurchu C, *et al*. Foods and Dietary Patterns That Are Healthy, Low-Cost, and Environmentally Sustainable: A Case Study of Optimization Modeling for New Zealand. *PLoS ONE* 2013;**8**:e59648.

34 Moran D, MacLeod M, Wall E, *et al*. UK Marginal Abatement Cost Curves for the Agriculture and Land Use, Land-Use Change and Forestry Sectors out to 2022, with Qualitative Analysis of Options to 2050. Report to the Committee on Climate Change. London: 2008.

35 Stern N. Stern Review: The Economics of Climate Change. London: 2006.

36 Ackerman F, Stanton EA. Climate Risks and Carbon Prices: Revising the Social Cost of Carbon. *Economics: The Open-Access, Open Assessment E-Journal* 2012;**6**:2012–10.

37 Department for the Environment Food and Rural Affairs. Family Food 2010. London: 2011.

38 Audsley E, Brander M, Chatterton J, *et al*. How low can we go? An assessment of greenhouse gas emissions from the UK food system and the scope to reduce them by 2050. *Food Climate Research Network – WWF-UK* 2009.

39 FAOSTAT. The Statistics Division of the Food and Agriculture Organisation of the United Nations. 2012.<http://faostat.fao.org/> (accessed 7 Jun2013).

40 Tiffin R, Arnoult M. The demand for a healthy diet: estimating the almost ideal demand system with infrequency of purchase. *European Review of Agricultural Economics* 2010;**37**:501–21.

41 Scarborough P, Nnoaham K, Clarke D, *et al*. Modelling the impact of a healthy diet on cardiovascular disease and cancer mortality. *Journal of Epidemiology and Community Health* 2012;**66**:420–6.

42 Scarborough P, Morgan R, Webster P, *et al*. Differences in coronary heart disease, stroke and cancer mortality rates between England, Wales, Scotland and Northern Ireland: the role of diet and nutrition. *BMJ Open* 2011;**1**:e000263.

- 43 Department of Health. National Diet and Nutrition Survey Years 1 and 2, 2008/9 - 2009/10. 2011.
- 44 Department of Health. NHS Choices. Healthy eating. 2012.<http://www.nhs.uk/livewell/healthy-eating/Pages/Healthyeating.aspx> (accessed 6 Jun2013).
- 45 Office for National Statistics. Death registrations by single year of age, United Kingdom 2010. 2011.
- 46 Williams A, Audsley E, Sandars D. Determining the environmental burdens and resource use in the production of agricultural and horticultural commodities. Defra project report IS0205. Bedford: 2006.
- 47 Department for the Environment Food and Rural Affairs. Survey sampling for Family Food. London: 2011. <http://www.defra.gov.uk/statistics/files/defra-stats-foodfarm-food-methodology-sampling-111213.pdf>
- 48 Quested T, Parry A. New estimates for household food and drink waste in the UK. Banbury: 2011.
- 49 Andreyeva T, Chaloupka FJ, Brownell KD. Estimating the potential of taxes on sugar-sweetened beverages to reduce consumption and generate revenue. *Preventative Medicine* 2011;**52**:413–6.
- 50 Lin BH, Smith TA, Lee JY, *et al*. Measuring weight outcomes for obesity intervention strategies: the case of a sugar-sweetened beverage tax. *Economics and Human Biology* 2011;**9**:329–41.
- 51 Commission on the Social Determinants of Health. Closing the gap in a generation. Geneva: 2008.
- 52 Smed S, Jensen JD, Denver S. Socioeconomic characteristics and the effect of taxation as a health policy instrument. *Food Policy* 2007;**32**:624–39.
- 53 Her Majesty's Revenue and Customs. Tobacco products duty. 2012.<http://www.hmrc.gov.uk/rates/tobacco-duty.htm> (accessed 7 Jun2013).
- 54 Price R, Thornton S, Nelson S. The Social Cost Of Carbon and the Shadow Price Of Carbon: what they are, and how to use them in economic appraisal in the UK. London: 2007.

1  
2  
3  
4  
5  
6  
7  
8  
9  
10  
11  
12  
13  
14  
15  
16  
17  
18  
19  
20  
21  
22  
23  
24  
25  
26  
27  
28  
29  
30  
31  
32  
33  
34  
35  
36  
37  
38  
39  
40  
41  
42  
43  
44  
45  
46  
47  
48  
49  
50  
51  
52  
53  
54  
55  
56  
57  
58  
59  
60

For peer review only

## FIGURE LEGENDS

### Figure 1. Modelling pathway

The figure highlights the major steps in the modelling pathway used in this research.

tCO<sub>2</sub>e, tonnes of CO<sub>2</sub> equivalents

Formatted: Font: Not Bold

### **Figure 12. DIETRON model conceptual framework**

The figure demonstrates relationships between different components of the DIETRON comparative risk assessment model. Model inputs are to the left of the figure with outcomes on the right and mediating factors in the middle. Solid lines represent a negative health relationship and dashed lines represent a positive relationship.

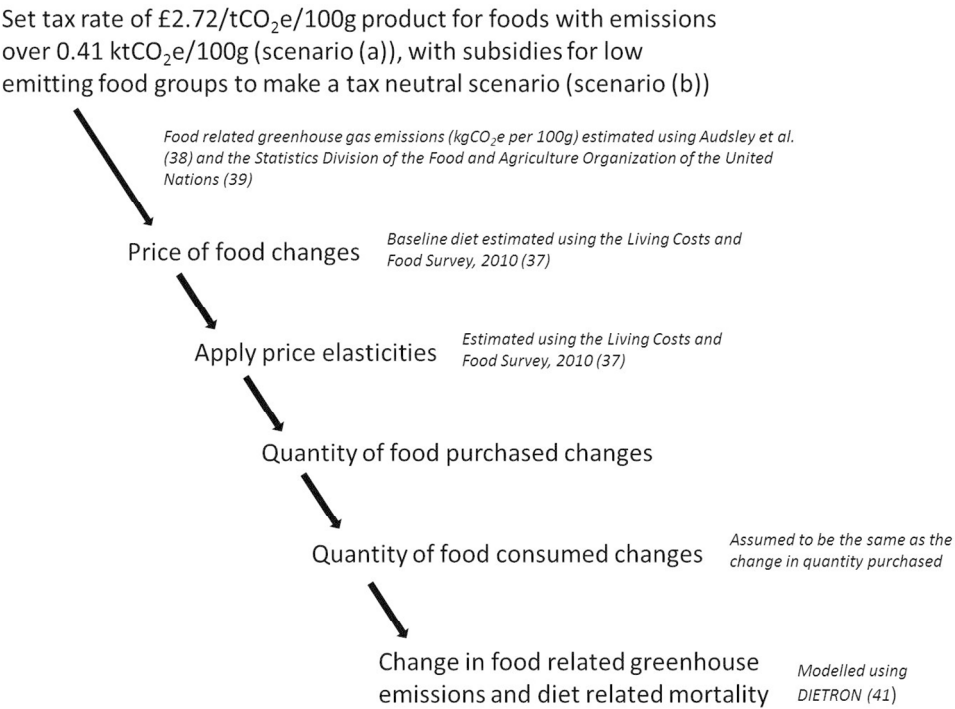

The figure highlights the major steps in the modelling pathway used in this research.  
tCO<sub>2</sub>e, tonnes of CO<sub>2</sub> equivalents  
239x175mm (150 x 150 DPI)



The figure demonstrates relationships between different components of the DIETRON comparative risk assessment model. Model inputs are to the left of the figure with outcomes on the right and mediating factors in the middle. Solid lines represent a negative health relationship and dashed lines represent a positive relationship.

223x145mm (150 x 150 DPI)

1  
2  
3  
4  
5  
6  
7  
8  
9  
10  
11  
12  
13  
14  
15  
16  
17  
18  
19  
20  
21  
22  
23  
24  
25  
26  
27  
28  
29  
30  
31  
32  
33  
34  
35  
36  
37  
38  
39  
40  
41  
42  
43  
44  
45  
46  
47  
48  
49  
50  
51  
52  
53  
54  
55  
56  
57  
58  
59  
60

**Supplementary table**

Modeling the Impact on Chronic Disease of Incorporating the Societal Cost of  
Greenhouse Gases into the Price of Food

Adam DM Briggs

Ariane Kehlbacher

Richard Tiffin

Tara Garnett

Mike Rayner

Peter Scarborough

**Contents**

|                             |   |
|-----------------------------|---|
| Supplemental Table, S1..... | 2 |
| Reference.....              | 3 |

**Supplementary Table, S1. Number of people in the UK consuming less than the recommended daily intake of micronutrients following tax scenarios (a) and (b) (000s).**

|                         | Recommended<br>daily intake <sup>1</sup> | Baseline | Scenario (a)<br>(95% CIs)    | Scenario (b)<br>(95% CIs)    |
|-------------------------|------------------------------------------|----------|------------------------------|------------------------------|
| Iron (mg/day)           | Female: 14.8;<br>Male: 8.7               | 37,119   | 38,027 (37,920<br>to 38,135) | 36,711 (36,543<br>to 36,977) |
| Calcium (mg/day)        | 700                                      | 16,507   | 16,741 (16,668<br>to 16,851) | 15,000 (14,814<br>to 15,182) |
| Zinc (mg/day)           | Female: 4-7;<br>Male: 5.5-9.5            | 18,361   | 19,766 (19,539<br>to 20,004) | 18,675 (18,443<br>to 18,911) |
| Vitamin A (µg /day)     | Female: 600;<br>Male: 700                | 23,982   | 25,035 (24,926<br>to 25,152) | 24,391 (24,270<br>to 24,518) |
| Vitamin B12<br>(µg/day) | 1.5                                      | 624      | 710 (699 to<br>722)          | 617 (603 to<br>632)          |

Assumes 2010 UK population of 62,262,000. CI, credible intervals

1  
2  
3  
4  
5  
6  
7  
8  
9  
10  
11  
12  
13  
14  
15  
16  
17  
18  
19  
20  
21  
22  
23  
24  
25  
26  
27  
28  
29  
30  
31  
32  
33  
34  
35  
36  
37  
38  
39  
40  
41  
42  
43  
44  
45  
46  
47  
48  
49  
50  
51  
52  
53  
54  
55  
56  
57  
58  
59  
60

Reference

1     Department of Health. NHS Choices. Healthy eating.  
2012.<http://www.nhs.uk/livewell/healthy-eating/Pages/Healthyeating.aspx>  
(accessed 6 Jun2013).

For peer review only
